# Supplementary material for: Replicated methylation changes associated with eczema herpeticum and allergic response
Source: Clin Epigenetics. 2019 Aug 23;11:122. doi: 10.1186/s13148-019-0714-1 (PMC6706929; doi:10.1186/s13148-019-0714-1)
Supplement: Supplementary file 2 — Table S2 and S3. DMPs significant from gene-based analysis for both phenotype groups and severity scores. (XLSX 31 kb) [file 13148_2019_714_MOESM2_ESM.xlsx]

## Sheet: SuppTableS2 Gene-based groups
Supplementary Table S2: Effect size, p-value and FDR-adjusted q-values from three pair-wise group
comparisons for 129 CpGs in 7 genes (and receptors) from the discovery data set.
ID	CHR	POS	GENE	Diff_ADNA	Pval_ADNA	qVal_ADNA	Diff_EHNA	Pval_EHNA	qVal_EHNA	Diff_ADEH	Pval_ADEH	qVal_ADEH
cg01880149	1	152284601	FLG	0.0233905	0.496952	0.933841	-0.034371	0.444409	0.849697	-0.0493941	0.16899	0.726659
cg03465714	1	152285911	FLG	0.0493566	0.156295	0.720163	0.00202075	0.969792	0.985064	-0.0176369	0.663688	0.932656
cg07548383	1	152284827	FLG	-0.00105463	0.85703	0.990527	0.00291543	0.679044	0.925398	-0.00116251	0.833322	0.960293
cg10321714	1	152280068	FLG	0.000847293	0.987488	0.990527	0.0207887	0.703015	0.925398	0.00291805	0.957396	0.988033
cg10500702	1	152299041	FLG	-0.0522754	0.377748	0.86311	-0.0876096	0.272799	0.849697	-0.0965122	0.142594	0.726659
cg13447818	1	152298884	FLG	-0.00170438	0.96734	0.990527	0.0602408	0.30465	0.849697	0.0252025	0.621242	0.932656
cg19855573	1	152297873	FLG	0.0853663	0.149619	0.720163	-0.0486798	0.496635	0.860671	-0.137812	0.0174205	0.726659
cg22719314	1	152290334	FLG	0.0881329	0.249021	0.798328	-0.0129626	0.891368	0.966638	-0.0181038	0.809189	0.960293
cg26390526	1	152299078	FLG	0.0460749	0.438446	0.897827	0.102526	0.228262	0.849697	-0.00850658	0.887586	0.962272
cg12377972	5	132009630	IL4	-0.125947	0.142703	0.720163	-0.112942	0.284125	0.849697	0.0156206	0.859008	0.960293
cg18145937	5	132010740	IL4	-0.00182935	0.900359	0.990527	0.0017522	0.931726	0.980716	0.0117697	0.464672	0.905109
cg23943829	5	132009111	IL4	-0.00375061	0.910739	0.990527	-0.142542	0.000222373	0.0286861	-0.0800035	0.0250059	0.726659
cg25368824	5	132009352	IL4	-0.0668655	0.166415	0.74029	-0.0243023	0.687883	0.925398	0.0626064	0.21507	0.736648
cg26787239	5	132008525	IL4	-0.0627917	0.191086	0.753224	-0.0356756	0.551032	0.888539	0.0387108	0.469491	0.905109
cg04022379	5	110408740	TSLP	-0.0332515	0.477645	0.933581	0.0402367	0.529406	0.864473	0.0592747	0.247555	0.736648
cg04450332	5	110408780	TSLP	0.0592908	0.153526	0.720163	0.0208424	0.687519	0.925398	0.0602295	0.138231	0.726659
cg08354104	5	110409196	TSLP	0.00188728	0.950291	0.990527	0.0444724	0.245094	0.849697	0.0157633	0.628661	0.932656
cg08734618	5	110408916	TSLP	-0.021369	0.537008	0.936135	0.0107261	0.816591	0.957638	0.0176987	0.640065	0.932656
cg10931190	5	110406506	TSLP	-0.0348359	0.0529136	0.480485	-0.0133935	0.597887	0.918183	0.00387679	0.863519	0.960293
cg15089387	5	110406661	TSLP	0.0136734	0.799628	0.990527	0.0203116	0.751443	0.949736	-0.0140339	0.741169	0.960293
cg15557878	5	110406049	TSLP	-0.00933538	0.822066	0.990527	0.0401511	0.475612	0.852138	0.0520553	0.232032	0.736648
cg15739437	5	110407538	TSLP	0.0349162	0.499469	0.933841	0.106987	0.143292	0.849697	0.111673	0.0484548	0.726659
cg16280705	5	110408910	TSLP	0.0306856	0.566178	0.948577	-0.0762898	0.237453	0.849697	-0.00718605	0.899211	0.962272
cg17157872	5	110408788	TSLP	0.00291255	0.949348	0.990527	0.0339974	0.521572	0.864473	0.0186876	0.652471	0.932656
cg18049164	5	110407157	TSLP	-0.0487987	0.322083	0.835066	0.00437592	0.943988	0.982052	0.0764505	0.129212	0.726659
cg18897025	5	110413671	TSLP	-0.0948162	0.113541	0.720163	0.0956744	0.20376	0.849697	0.147923	0.00889394	0.726659
cg20710777	5	110411740	TSLP	-0.101549	0.120244	0.720163	-0.0908609	0.241556	0.849697	0.0222242	0.724443	0.960293
cg21145140	5	110409467	TSLP	0.0754204	0.241964	0.798328	0.0557605	0.502847	0.860671	-0.0105951	0.863304	0.960293
cg24994173	5	110408997	TSLP	-0.0568245	0.425726	0.897827	-0.0279348	0.743191	0.949736	0.127493	0.0709459	0.726659
cg25328184	5	110406414	TSLP	-0.00320538	0.940473	0.990527	-0.00760073	0.876422	0.966311	0.0623878	0.198571	0.735946
cg27323009	5	110408974	TSLP	0.0376766	0.433242	0.897827	0.0472353	0.411339	0.849697	-0.0239108	0.606399	0.932656
cg07090653	1	152784914	LCE1B	0.0893784	0.0761883	0.614373	-0.0311848	0.619652	0.925398	-0.0694991	0.137726	0.726659
cg08878744	1	152783674	LCE1B	-0.000783213	0.982893	0.990527	0.0253306	0.637676	0.925398	0.051793	0.218366	0.736648
cg12449852	1	152785473	LCE1B	0.0318905	0.450296	0.907683	-0.0655669	0.210725	0.849697	-0.0878027	0.0338743	0.726659
cg19250709	1	152783489	LCE1B	0.0338184	0.553474	0.948577	-0.0806615	0.248369	0.849697	-0.0664647	0.244183	0.736648
cg21434954	1	152783137	LCE1B	-0.0269941	0.643859	0.988777	-0.0551325	0.446154	0.849697	-0.0570251	0.300005	0.841616
cg00097968	1	152126975	RPTN	0.0137288	0.680813	0.990527	-0.0205671	0.586605	0.915686	-0.047795	0.139577	0.726659
cg05765254	1	152132853	RPTN	0.0483047	0.393775	0.872338	0.173049	0.0229959	0.494413	0.0612463	0.371745	0.860598
cg11535506	1	152132450	RPTN	0.00246845	0.957794	0.990527	-0.0176123	0.767969	0.949736	0.0141652	0.779631	0.960293
cg12480301	1	152128681	RPTN	-0.0369607	0.336611	0.835066	-0.0151738	0.738053	0.949736	0.00799639	0.857916	0.960293
cg17443668	1	152130772	RPTN	0.151217	0.0212383	0.371389	0.0122113	0.868563	0.966311	-0.108323	0.101698	0.726659
cg25304681	1	152132592	RPTN	-0.0454008	0.531867	0.936135	0.188692	0.0465668	0.693063	0.0902681	0.249817	0.736648
cg00090800	16	27325237	IL4R	-0.0121552	0.821116	0.990527	0.0311133	0.656794	0.925398	0.0892781	0.119964	0.726659
cg01165142	16	27367172	IL4R	0.0649435	0.0976679	0.720163	0.0621751	0.173528	0.849697	0.0393309	0.316878	0.853433
cg01706029	16	27325672	IL4R	-0.000539423	0.987175	0.990527	-0.00743641	0.866898	0.966311	0.00807075	0.828659	0.960293
cg03980304	16	27325000	IL4R	0.0431092	0.346362	0.843097	0.0836259	0.17799	0.849697	0.0312119	0.539475	0.913494
cg04303330	5	131992430	IL13	-0.122642	0.0010365	0.133749	-0.151618	0.000682162	0.0439994	-0.0148072	0.66515	0.932656
cg05729093	16	27324953	IL4R	0.0444966	0.246046	0.798328	-0.0561401	0.264413	0.849697	-0.0630868	0.161066	0.726659
cg05903710	16	27375732	IL4R	0.036625	0.335295	0.835066	-0.100382	0.0673005	0.693063	-0.0807742	0.0630418	0.726659
cg06584121	5	131993818	IL13	-0.0636653	0.112269	0.720163	-0.0499009	0.295455	0.849697	-0.0253041	0.553024	0.914617
cg06641959	16	27325254	IL4R	-0.0361892	0.259821	0.798328	0.00955434	0.812189	0.957638	0.0403041	0.25126	0.736648
cg06967316	5	131993853	IL13	-0.0609612	0.0230287	0.371389	-0.0471981	0.187382	0.849697	0.0218253	0.462799	0.905109
cg07810967	5	131993925	IL13	0.0154445	0.660053	0.990527	-0.0022013	0.9559	0.985064	0.00778145	0.835222	0.960293
cg08317580	16	27345891	IL4R	0.0010693	0.99051	0.990527	-0.0362638	0.699271	0.925398	-0.0600709	0.500525	0.913494
cg08932316	16	27324341	IL4R	0.0191647	0.73612	0.990527	0.0306129	0.640436	0.925398	0.00248088	0.969421	0.992502
cg09791102	16	27353414	IL4R	-0.0388837	0.560145	0.948577	-0.0766649	0.315288	0.849697	-0.0634708	0.341612	0.853433
cg11798521	5	131996143	IL13	-0.0183102	0.173412	0.745705	-0.0177261	0.276712	0.849697	0.00608451	0.631796	0.932656
cg13566430	5	131992455	IL13	-0.024604	0.00957167	0.371389	-0.0163964	0.15054	0.849697	0.0079409	0.397863	0.876109
cg14523284	5	131993614	IL13	0.0815892	0.0224169	0.371389	0.0291939	0.507062	0.860671	-0.0409703	0.300111	0.841616
cg15329179	5	131993728	IL13	-0.0937926	0.0188902	0.371389	-0.0562369	0.26691	0.849697	0.0606828	0.168266	0.726659
cg16649560	16	27338391	IL4R	-0.0107412	0.705079	0.990527	-0.0866859	0.0163806	0.494413	-0.0414159	0.157374	0.726659
cg24580593	5	131994061	IL13	0.0118373	0.770826	0.990527	-0.0369705	0.434955	0.849697	-0.0570957	0.120895	0.726659
cg26937798	16	27326054	IL4R	0.0452198	0.327973	0.835066	0.132303	0.0206204	0.494413	0.0253893	0.576143	0.932656
cg00474004	9	21239944	IFNA14	0.00290708	0.947604	0.990527	-0.105997	0.0692383	0.693063	-0.0384376	0.413032	0.876109
cg00622702	21	34727950	IFNAR1	-0.0209176	0.579665	0.958673	0.00949735	0.834051	0.966311	0.0502876	0.183334	0.735946
cg00848007	12	68553396	IFNG	0.0736116	0.180948	0.753066	0.0501763	0.466095	0.849697	0.0373262	0.523342	0.913494
cg00937568	21	34602128	IFNAR2	-0.00457948	0.838881	0.990527	0.0362833	0.212335	0.849697	0.0208132	0.380264	0.860598
cg01281450	12	68548770	IFNG	0.0490586	0.307923	0.835066	0.0933994	0.107488	0.849697	0.0688081	0.16516	0.726659
cg01713938	9	21368292	IFNA13	-0.110228	0.233094	0.798328	-0.239797	0.0297862	0.548917	-0.0485293	0.544646	0.913494
cg01940810	12	68551655	IFNG	0.0177145	0.707504	0.990527	0.0174943	0.773041	0.949736	-0.0151223	0.759399	0.960293
cg02431704	21	34602713	IFNAR2	0.0122285	0.753415	0.990527	0.0342775	0.458316	0.849697	-0.00370127	0.917515	0.962272
cg02480602	6	137518909	IFNGR1	0.142688	0.0503402	0.480485	0.0664833	0.429212	0.849697	-0.0349107	0.64386	0.932656
cg03065308	6	137538584	IFNGR1	-0.0240174	0.627738	0.975635	-5.73584e-05	0.996246	0.996246	0.0170201	0.73315	0.960293
cg03866569	21	34697528	IFNAR1	0.00757253	0.845311	0.990527	-0.0514263	0.339943	0.849697	-0.0297117	0.495977	0.913494
cg04842828	21	34696676	IFNAR1	0.0592344	0.220684	0.798328	0.00191269	0.981188	0.988853	-0.083125	0.129233	0.726659
cg05224770	12	68553819	IFNG	0.0355874	0.619171	0.975635	0.0127573	0.894007	0.966638	-0.065526	0.336469	0.853433
cg06121323	21	34697899	IFNAR1	0.023199	0.474219	0.933581	-0.00129822	0.96931	0.985064	-0.0193723	0.477112	0.905109
cg06665941	21	34602869	IFNAR2	-0.0734588	0.0417725	0.449103	-0.0427177	0.345001	0.849697	0.0201931	0.589133	0.932656
cg07401792	6	137539816	IFNGR1	-0.0452145	0.380959	0.86311	-0.0342131	0.577434	0.915686	0.0107875	0.848734	0.960293
cg07845895	21	34776100	IFNGR2	-0.00583239	0.919416	0.990527	-0.0369438	0.619336	0.925398	0.00106366	0.992072	0.993998
cg08173915	21	34774164	IFNGR2	-0.0316706	0.334817	0.835066	0.0416738	0.310205	0.849697	0.0500193	0.123501	0.726659
cg08492707	21	34696952	IFNAR1	0.0760781	0.00694709	0.371389	0.0367406	0.349198	0.849697	-0.0216564	0.470372	0.905109
cg08874470	21	34779962	IFNGR2	0.00139118	0.893719	0.990527	-0.0104565	0.46187	0.849697	-0.00968129	0.414284	0.876109
cg09179743	9	27524436	IFNK	0.0177105	0.677946	0.990527	-0.047896	0.372799	0.849697	-0.0393776	0.379441	0.860598
cg09885409	21	34697563	IFNAR1	-0.00942417	0.812767	0.990527	0.0364606	0.483491	0.854389	0.00762751	0.859385	0.960293
cg10572943	21	34775045	IFNGR2	0.00786875	0.86748	0.990527	-0.0525645	0.384036	0.849697	-0.0759622	0.0856826	0.726659
cg12640631	12	68554684	IFNG	-0.0505812	0.524472	0.936135	0.026759	0.805571	0.957638	0.0533138	0.545264	0.913494
cg13027384	21	34776124	IFNGR2	0.0353088	0.534319	0.936135	0.054581	0.445373	0.849697	-0.00660472	0.906855	0.962272
cg13208562	21	34603264	IFNAR2	0.00695926	0.883138	0.990527	-0.0495583	0.467663	0.849697	0.0277349	0.585	0.932656
cg13370280	6	137539688	IFNGR1	-0.0525816	0.0404677	0.449103	-0.0432452	0.156426	0.849697	0.0367823	0.119243	0.726659
cg14279899	6	137540774	IFNGR1	-0.0601293	0.192678	0.753224	-0.104992	0.0935104	0.80419	0.0148575	0.786803	0.960293
cg14297867	9	27526172	IFNK	-0.0557445	0.259914	0.798328	0.0116342	0.857327	0.966311	0.00794743	0.887703	0.962272
cg14352951	21	34696688	IFNAR1	0.0299081	0.508154	0.936135	0.0745422	0.134318	0.849697	0.0105394	0.808352	0.960293
cg14850771	21	34775459	IFNGR2	-0.092698	0.213115	0.798328	-0.085754	0.344131	0.849697	0.084412	0.20538	0.735946
cg14911223	21	34700152	IFNAR1	-0.0116568	0.621187	0.975635	-0.0274337	0.353549	0.849697	-0.0322727	0.204662	0.735946
cg15382669	21	34697036	IFNAR1	-0.0138744	0.765581	0.990527	0.0137561	0.804829	0.957638	0.0120342	0.772944	0.960293
cg15669228	9	21409505	IFNA8	0.0133749	0.773375	0.990527	-0.0156872	0.770903	0.949736	-0.0383376	0.410732	0.876109
cg16134430	21	34636155	IFNAR2	0.00195887	0.970405	0.990527	-0.0264796	0.645628	0.925398	0.0678663	0.187919	0.735946
cg17356733	21	34774627	IFNGR2	-0.0119248	0.755742	0.990527	0.0230102	0.589162	0.915686	0.0258545	0.515278	0.913494
cg17725807	21	34601817	IFNAR2	0.0706375	0.15547	0.720163	0.114204	0.0698435	0.693063	0.0600971	0.203807	0.735946
cg17748222	21	34634995	IFNAR2	0.00166634	0.9785	0.990527	-0.0373572	0.635099	0.925398	0.0403716	0.524178	0.913494
cg17977197	21	34601762	IFNAR2	-0.0536345	0.376534	0.86311	-0.132104	0.0786134	0.724367	-0.0959467	0.0831687	0.726659
cg18403613	9	21202213	IFNA7	0.0729388	0.0372129	0.449103	0.0751785	0.0689514	0.693063	0.0290198	0.353012	0.853433
cg18576635	6	137540623	IFNGR1	-0.0100831	0.850049	0.990527	-0.0513692	0.452603	0.849697	-0.0418867	0.45034	0.905109
cg18656581	21	34602557	IFNAR2	-0.064044	0.0218721	0.371389	-0.0266295	0.430157	0.849697	0.0262248	0.334257	0.853433
cg20000468	21	34601686	IFNAR2	-0.0512644	0.311997	0.835066	0.0146179	0.814467	0.957638	0.0526243	0.346982	0.853433
cg20215695	21	34602070	IFNAR2	-0.0690349	0.229961	0.798328	-0.0595953	0.438851	0.849697	-0.036597	0.529363	0.913494
cg20817150	21	34776492	IFNGR2	0.0132653	0.719234	0.990527	-0.00555926	0.899198	0.966638	-0.0179222	0.60875	0.932656
cg20890145	12	68554673	IFNG	-0.166	0.106418	0.720163	-0.137433	0.242771	0.849697	-0.00855091	0.917282	0.962272
cg21023114	9	21241233	IFNA14	0.0191347	0.797145	0.990527	0.0363566	0.689384	0.925398	0.0255528	0.760374	0.960293
cg21030939	6	137540666	IFNGR1	-0.0278016	0.124382	0.720163	0.0137101	0.401926	0.849697	0.0164776	0.357251	0.853433
cg21292957	21	34602922	IFNAR2	0.00336712	0.809461	0.990527	-0.0185819	0.209488	0.849697	0.00253794	0.855315	0.960293
cg21355791	21	34602157	IFNAR2	-0.0129481	0.595491	0.972379	-0.0124288	0.682037	0.925398	0.00040473	0.993998	0.993998
cg21664037	21	34809647	IFNGR2	0.00876942	0.885418	0.990527	0.111931	0.130481	0.849697	0.0181253	0.784956	0.960293
cg21980821	21	34602030	IFNAR2	0.0505584	0.13401	0.720163	-0.0516945	0.245979	0.849697	-0.0541643	0.0996715	0.726659
cg22212414	21	34775032	IFNGR2	-0.0037654	0.905147	0.990527	-0.034404	0.431225	0.849697	-0.0613433	0.090803	0.726659
cg22454603	21	34602027	IFNAR2	0.00687124	0.882839	0.990527	0.0986786	0.0689565	0.693063	0.00600178	0.90175	0.962272
cg22669060	21	34774882	IFNGR2	-0.00947848	0.425607	0.897827	0.0140146	0.325845	0.849697	0.0124059	0.329485	0.853433
cg23029519	9	21187344	IFNA4	-0.0197439	0.624241	0.975635	0.00508589	0.92649	0.980716	-0.000229487	0.989326	0.993998
cg23508786	21	34775291	IFNGR2	-0.0066949	0.933593	0.990527	0.0702866	0.459317	0.849697	0.0872778	0.228876	0.736648
cg24768245	21	34602948	IFNAR2	-0.000357483	0.989915	0.990527	0.0867145	0.0209417	0.494413	0.050771	0.111976	0.726659
cg24865779	21	34775042	IFNGR2	-0.0538266	0.274062	0.813705	-0.0104083	0.870182	0.966311	0.0105599	0.848287	0.960293
cg25543316	6	137540615	IFNGR1	-0.12941	0.0295584	0.423723	-0.0133832	0.861329	0.966311	0.0507311	0.449317	0.905109
cg26227465	12	68553577	IFNG	0.0321651	0.316102	0.835066	0.050459	0.256003	0.849697	0.00335621	0.935247	0.972959
cg26668632	6	137540814	IFNGR1	-0.0384469	0.38137	0.86311	0.0395102	0.525015	0.864473	0.0144943	0.781442	0.960293
cg26976562	6	137540401	IFNGR1	0.0751582	0.0558596	0.480485	-0.0645697	0.215878	0.849697	-0.0880893	0.0270025	0.726659
cg27469991	21	34776637	IFNGR2	0.0407137	0.398949	0.872338	-0.00450453	0.935101	0.980716	0.00925711	0.842458	0.960293
cg27490198	6	137540157	IFNGR1	0.00915579	0.277518	0.813705	0.0108693	0.772216	0.949736	-0.0158376	0.603639	0.932656
cg27634991	6	137536245	IFNGR1	-0.0391503	0.487787	0.933841	0.0777178	0.343529	0.849697	0.128258	0.0430671	0.726659

## Sheet: SuppTableS3 Gene-based severity
Supplementary Table S3: Effect size, p-value and FDR-adjusted q-values from tIgE analysis on 26 CpGs from IL4, IL13
and IL4R from the discovery data set.
ID	GENE	Diff_IgE_cases	Pval_IgE_cases	qval_IgE
cg15329179	IL13	-0.0829589	0.000326361	0.0042427
cg26787239	IL4	-0.107333	0.000191091	0.0042427
cg06641959	IL4R	0.0522263	0.00251423	0.0163425
cg06967316	IL13	-0.0490293	0.00191784	0.0163425
cg14523284	IL13	-0.0602501	0.003353	0.0174356
cg23943829	IL4	-0.0548791	0.00546489	0.0236812
cg16649560	IL4R	-0.0361837	0.018487	0.0686658
cg12377972	IL4	-0.0959675	0.0284377	0.0924226
cg24580593	IL13	-0.0380698	0.0449706	0.129915
cg03980304	IL4R	0.0484106	0.0619248	0.146368
cg04303330	IL13	-0.0336532	0.0616507	0.146368
cg18145937	IL4	-0.0150366	0.0784122	0.169893
cg06584121	IL13	-0.0380409	0.101165	0.1995
cg07810967	IL13	-0.0307461	0.107423	0.1995
cg11798521	IL13	0.0074932	0.245295	0.403786
cg25368824	IL4	-0.0316895	0.248483	0.403786
cg01165142	IL4R	-0.0216013	0.295737	0.452304
cg00090800	IL4R	-0.0247112	0.411455	0.563044
cg05729093	IL4R	-0.0196198	0.410264	0.563044
cg26937798	IL4R	-0.0158576	0.499383	0.649198
cg08932316	IL4R	0.016436	0.547835	0.678272
cg09791102	IL4R	0.0180788	0.598396	0.682909
cg13566430	IL13	-0.00257916	0.604112	0.682909
cg05903710	IL4R	-0.00737868	0.756663	0.819718
cg01706029	IL4R	-0.0040249	0.839868	0.839868
cg08317580	IL4R	0.00995402	0.82415	0.839868
