# Supplementary material for: Replicated methylation changes associated with eczema herpeticum and allergic response
Source: Clin Epigenetics. 2019 Aug 23;11:122. doi: 10.1186/s13148-019-0714-1 (PMC6706929; doi:10.1186/s13148-019-0714-1)
Supplement: Supplementary file 3 — Table S4. DMPs significant from ADEH− vs controls and/or ADEH+ vs controls analysis at an FDR threshold of 0.05 from model adjusting for six cell types. (XLSX 91 kb) [file 13148_2019_714_MOESM3_ESM.xlsx]

## Sheet: SuppTableS4 DMPs Six Cell Types
Supplementary Table S4: Effect sizes, p-values and FDR-adjusted q-values for 491 CpGs significant in at least
one of three group-wise comparisons from model with six cell types (no specific adjustment
for eosinophil fraction) from discovery data set.
CpG	CHR	Pos	Gene	Diff_ADNA	Pval-ADNA	Qval-ADNA	Diff_EHNA	Pval-EHNA	Qval-EHNA	Diff_ADEH	Pval-ADEH	Qval-ADEH
cg00024471	3	188692547		-0.106168	0.00286621	0.685679	-0.180485	2.60791e-05	0.0306842	-0.0510076	0.171011	0.975013
cg00100703	17	33514885	UNC45B;UNC45B	-0.118567	0.0321918	0.896366	-0.258022	1.77427e-05	0.0236145	-0.0764084	0.124863	0.968227
cg00119811	5	73092353	RGNEF	-0.0872376	0.0030466	0.690224	-0.162289	3.2357e-06	0.00754048	-0.106282	0.00037571	0.713225
cg00170714	17	40724562	MLX;MLX;PSMC3IP;PSMC3IP;MLX	-0.0612967	0.13356	0.960622	-0.200739	1.12e-05	0.0179204	-0.0844362	0.0501356	0.943926
cg00286717	11	6225537	C11orf42	-0.163262	0.00170115	0.637069	-0.27273	7.88924e-06	0.0141793	-0.0395158	0.447803	0.990764
cg00324520	15	41411926		-0.0914398	0.00133274	0.601068	-0.192008	7.97983e-07	0.00289119	-0.012153	0.736538	0.996895
cg00340958	20	48328658	B4GALT5	0.105537	0.00383997	0.726629	0.178759	4.67908e-05	0.0462351	0.0411025	0.238725	0.981324
cg00366037	10	76781121	MYST4	-0.211994	8.46744e-06	0.15495	-0.271753	4.30672e-06	0.00949794	-0.0588273	0.235789	0.981094
cg00381391	3	33837694		-0.0987472	0.0382359	0.90625	-0.272105	1.93547e-06	0.00538761	-0.0557908	0.2624	0.982257
cg00458295	2	111593263	ACOXL;ACOXL;ACOXL	-0.0775937	0.151345	0.965809	-0.265043	3.09175e-05	0.034425	-0.113613	0.0430558	0.94179
cg00582671	1	872235	SAMD11	-0.130997	0.00110366	0.584549	-0.22872	5.17961e-06	0.0104166	0.00803839	0.852949	0.998399
cg00637085	5	126952391		-0.165733	0.0031133	0.694374	-0.293676	1.45835e-05	0.0208459	-0.0433951	0.408319	0.989116
cg00638845	6	137544615		-0.138611	0.0123961	0.830366	-0.351101	3.83575e-07	0.00176876	-0.0640792	0.290759	0.983408
cg00711896	16	30410051	ZNF48	-0.095918	3.83241e-05	0.248382	-0.133526	2.46719e-05	0.0295957	-0.00917082	0.717027	0.996369
cg00736681	8	134546052	ST3GAL1;ST3GAL1	-0.149589	0.00254975	0.685533	-0.34535	3.12443e-08	0.000303477	-0.0975898	0.0668835	0.952384
cg00793181	12	52995634	KRT72;KRT72;KRT72	-0.0674321	0.0443401	0.914388	-0.164228	1.6239e-05	0.0223182	-0.0374545	0.23502	0.980959
cg00837308	16	88473488		-0.0834772	0.0369121	0.903113	-0.22188	1.25947e-05	0.0194245	-0.1044	0.0106382	0.880602
cg00851028	1	234905772		-0.0420708	0.111501	0.954876	-0.145506	1.09947e-05	0.0177358	-0.0719916	0.00780881	0.871017
cg00869582	16	12564745	SNX29	-0.102793	0.0112128	0.827045	-0.214658	4.78323e-05	0.0468586	-0.0535805	0.22369	0.980211
cg00944309	5	60142446		-0.15956	1.09062e-05	0.15495	-0.227741	4.38973e-07	0.00190854	-0.0262583	0.507459	0.991793
cg00978785	17	71185631		-0.103315	0.00026095	0.447846	-0.129526	4.13636e-05	0.0425855	0.00229575	0.937858	0.999703
cg00986350	16	88540396	ZFPM1	-0.123038	0.00445158	0.736749	-0.221599	2.8307e-05	0.0326326	-0.0171778	0.693197	0.996126
cg01093786	11	96047698	MAML2	0.124315	0.00705245	0.783154	0.235906	1.4072e-06	0.00433804	0.0640126	0.144649	0.971212
cg01104306	11	4066205	STIM1	-0.0839779	0.0189388	0.858064	-0.190826	2.48391e-06	0.00626333	-0.0871091	0.0220139	0.907202
cg01126699	14	104625468	KIF26A	-0.0441752	0.000278712	0.452402	-0.069906	2.74604e-06	0.00666809	-0.00360655	0.74618	0.996972
cg01258949	11	47092992	C11orf49;C11orf49;C11orf49;C11orf49	-0.0836905	0.203349	0.974109	-0.363793	2.47467e-06	0.00626333	-0.138093	0.0269258	0.916832
cg01304182	16	30409908	ZNF48	-0.0569169	0.000146253	0.365391	-0.104064	2.72851e-08	0.000288602	-0.0134094	0.410293	0.989116
cg01310029	3	3152374	IL5RA;IL5RA;IL5RA;IL5RA;IL5RA;IL5RA	-0.17574	0.000285754	0.452402	-0.27442	3.05334e-05	0.0341336	-0.0250293	0.642472	0.995103
cg01376665	15	40641810	PHGR1	-0.102898	0.00254247	0.685533	-0.179821	1.9758e-05	0.0254079	-0.0424275	0.219516	0.979607
cg01378515	3	124773106	HEG1	-0.0891584	0.00879666	0.803355	-0.175727	2.11539e-06	0.00561878	-0.0486853	0.146254	0.971986
cg01425762	16	81666633	CMIP;CMIP	-0.0326967	0.229495	0.976423	-0.135314	5.13546e-05	0.0487402	-0.0705639	0.0102378	0.880602
cg01445399	1	87596934	LOC339524;LOC339524;LOC339524;LOC339524;LOC339524	-0.0652327	0.109154	0.954135	-0.20686	1.0045e-05	0.0166751	-0.0604666	0.139853	0.969818
cg01613077	20	4764277	RASSF2;RASSF2	-0.0927457	0.0589782	0.926151	-0.264171	2.92319e-05	0.0333618	-0.124924	0.024678	0.913439
cg01614759	10	45495435	C10orf25;ZNF22	-0.166624	0.000472698	0.493299	-0.328295	6.66233e-08	0.000457898	-0.0414632	0.426494	0.990276
cg01632240	8	42009223	AP3M2;AP3M2	0.0472072	0.0391657	0.908252	0.142952	4.48513e-06	0.00969454	0.0348393	0.198374	0.977964
cg01649647	20	35177530	MYL9;MYL9	-0.075446	0.00377002	0.723168	-0.151183	5.93061e-07	0.00235426	-0.0288296	0.297566	0.983408
cg01770400	1	173886485	SERPINC1;SERPINC1	-0.146341	0.000403855	0.484941	-0.251982	1.43726e-06	0.00434521	-0.0545265	0.214208	0.979324
cg01888395	9	132145105		-0.0620045	0.142414	0.963566	-0.248003	5.51136e-07	0.00226667	-0.118719	0.00508738	0.851526
cg01901579	14	95615731	DICER1	-0.124354	0.00533261	0.753916	-0.299359	5.5274e-08	0.00041366	-0.0597687	0.202306	0.978408
cg01942646	1	27240694	NR0B2	-0.108841	0.0132922	0.83512	-0.220287	2.29773e-05	0.0281219	-0.032658	0.467372	0.9913
cg01998785	16	55542709	LPCAT2	-0.131105	0.000747547	0.533185	-0.244608	7.87128e-08	0.000506314	-0.0523601	0.184773	0.975986
cg02065192	1	6421414	ACOT7;ACOT7;ACOT7	-0.0892428	0.00239493	0.682422	-0.159044	1.88519e-05	0.0244991	-0.0391057	0.208137	0.978495
cg02124524	16	85655007	KIAA0182;KIAA0182	-0.108938	9.10987e-05	0.314166	-0.144167	1.13297e-05	0.0180215	-0.0155964	0.524434	0.991861
cg02133716	8	128981622	PVT1	-0.167381	0.000353728	0.47416	-0.289022	1.99671e-07	0.00107238	-0.056531	0.237033	0.981106
cg02195201	11	19135951		-0.150926	0.0103201	0.818052	-0.328843	1.19975e-06	0.0038844	-0.0955439	0.0912347	0.960795
cg02245534	17	81043668	METRNL	-0.115094	0.00185954	0.641054	-0.210386	1.96148e-06	0.00541487	-0.0442378	0.236013	0.981106
cg02402423	19	41255444	C19orf54;SNRPA	-0.127088	0.000548071	0.511279	-0.232115	5.88636e-07	0.00235426	-0.0301527	0.466629	0.991188
cg02427831	19	51961937	SIGLEC8	-0.10386	0.0147333	0.84284	-0.201414	4.19859e-05	0.0428795	-0.00937699	0.827236	0.998246
cg02464901	2	188851274		-0.0967694	0.0248652	0.877825	-0.21722	1.60999e-05	0.0222048	-0.083601	0.0397855	0.939068
cg02475695	16	616220	NHLRC4	-0.120274	0.00115993	0.587372	-0.261348	6.00486e-08	0.000442145	-0.0488034	0.224479	0.980324
cg02494549	2	161798364		-0.16298	0.00879558	0.803355	-0.359113	1.81556e-07	0.000998589	-0.0785663	0.186927	0.976427
cg02593766	17	48608677	MYCBPAP;EPN3	0.10894	0.004761	0.742115	0.205205	1.0297e-05	0.0168659	0.0495914	0.159735	0.97369
cg02596233	7	150970209	SMARCD3;SMARCD3	-0.132446	0.00231415	0.676337	-0.235043	2.11698e-06	0.00561878	-0.0106601	0.797756	0.997521
cg02752812	6	167101267	RPS6KA2	-0.0670963	0.0708263	0.934959	-0.179325	1.86461e-05	0.0243902	-0.101581	0.00757983	0.866305
cg02757667	2	179149472	OSBPL6	-0.0941443	0.0248334	0.877825	-0.192109	5.07872e-05	0.0483021	-0.0213218	0.558318	0.992348
cg02859042	12	124971861	NCOR2;NCOR2	-0.0936877	0.0393059	0.908252	-0.255325	5.1024e-06	0.0103067	-0.093703	0.0411331	0.940646
cg02906503	17	76564972	DNAH17	-0.0387395	0.176492	0.969477	-0.153127	4.41949e-06	0.00960739	-0.0752107	0.0125379	0.882817
cg02970679	17	56269818	EPX	-0.162167	0.000172483	0.392658	-0.309271	5.74934e-09	9.72091e-05	-0.0489946	0.299254	0.983408
cg02985445	7	97908505		-0.109402	0.00262027	0.685533	-0.22073	1.50147e-07	0.000846222	-0.0267121	0.467115	0.9913
cg03106413	1	6683528	PHF13	-0.0859753	0.0216317	0.869779	-0.182731	3.24393e-05	0.0352777	-0.0638436	0.0859587	0.960795
cg03131767	12	123446272	ABCB9;ABCB9;ABCB9	-0.167288	0.000113339	0.339322	-0.266244	7.24026e-08	0.000479025	-0.0515196	0.194005	0.977237
cg03159676	16	85600536		-0.102619	0.015193	0.84616	-0.263421	2.57854e-05	0.030594	-0.106237	0.0354909	0.93472
cg03231953	22	19716778		-0.1305	0.000481194	0.49445	-0.180183	2.18673e-05	0.027127	-0.0376812	0.306992	0.983784
cg03437605	8	22847209	RHOBTB2	-0.112079	0.00530047	0.753722	-0.268494	3.66138e-07	0.00174111	-0.0911739	0.0323538	0.928094
cg03453890	8	145643535	SLC39A4	-0.0444022	0.165663	0.967644	-0.154771	1.63889e-05	0.0223361	-0.0574782	0.0803893	0.958241
cg03479289	11	33563377	C11orf41	0.0871551	0.0036438	0.717999	0.13956	2.03489e-05	0.0260243	0.0248122	0.400483	0.98881
cg03493123	5	177029444	B4GALT7	-0.0341548	0.240505	0.978535	-0.169623	3.7237e-07	0.00174906	-0.0890972	0.00191178	0.820779
cg03507593	12	124939480	NCOR2;NCOR2	-0.0310074	0.0256323	0.879712	-0.0951642	3.76837e-08	0.000330417	-0.0377675	0.00766948	0.867939
cg03538814	19	34667843	LSM14A;LSM14A	-0.0471525	0.208775	0.974515	-0.204204	4.03027e-05	0.0419105	-0.148907	7.84426e-06	0.516038
cg03651219	10	5576480		-0.178041	0.000221162	0.417157	-0.257759	1.03077e-05	0.0168659	-0.0329029	0.495187	0.991793
cg03661164	7	148560646	EZH2;EZH2	-0.122337	0.0145076	0.841605	-0.27699	2.3251e-06	0.00596091	-0.0709422	0.135831	0.969171
cg03678274	1	236017128	LYST;MIR1537	0.0768455	0.133093	0.960541	0.269213	2.56457e-05	0.0305681	0.0776261	0.104793	0.964268
cg03693099	9	135936901	CEL	-0.0878262	0.00399105	0.728508	-0.161167	1.46579e-05	0.0208459	-0.0420933	0.18761	0.976499
cg03695871	11	65547172	DKFZp761E198	-0.0280326	0.0406067	0.910593	-0.0795579	6.49092e-06	0.0124504	-0.0257919	0.0798542	0.958241
cg03715305	19	5894715	NDUFA11	-0.0914927	0.00208418	0.654822	-0.154491	4.95917e-05	0.0476616	-0.0136122	0.676579	0.996007
cg03761216	1	51986130	EPS15	-0.104554	0.0233978	0.872521	-0.283057	2.28468e-08	0.000261962	-0.086707	0.0620893	0.948507
cg03837680	17	77967529	TBC1D16	-0.076064	0.00209788	0.655516	-0.125151	1.31616e-05	0.0199616	-0.0246596	0.379921	0.987843
cg03966055	22	40387288		-0.0950871	0.0380216	0.90625	-0.227359	2.0677e-05	0.0262934	-0.0959573	0.0205932	0.903951
cg04066472	8	142157867	DENND3	-0.0736354	0.0274323	0.883754	-0.158905	3.0581e-05	0.0341336	-0.0473936	0.125064	0.968227
cg04077085	4	9937674	SLC2A9;SLC2A9	-0.10408	0.0489281	0.917124	-0.260351	3.20751e-05	0.0352777	-0.0680585	0.204591	0.978408
cg04079215	1	95095221		0.0469465	0.0824952	0.943751	0.147997	5.11128e-07	0.0021407	0.0460297	0.0911988	0.960795
cg04111761	3	46282766	CCR3;CCR3;CCR3;CCR3	-0.0613898	0.19959	0.973211	-0.237086	4.54737e-05	0.045326	-0.0994955	0.0322773	0.928094
cg04120520	16	85708039	KIAA0182;KIAA0182	-0.11638	0.0102532	0.816638	-0.279699	4.28445e-07	0.00188068	-0.100196	0.0407659	0.940646
cg04138746	16	17034451		-0.0915139	0.124321	0.956993	-0.313104	1.62798e-05	0.0223182	-0.0952848	0.125355	0.968262
cg04217850	3	66428294	SLC25A26;SLC25A26;SLC25A26	-0.13032	3.49446e-05	0.245462	-0.247222	3.3013e-09	6.8504e-05	-0.0596549	0.107046	0.964271
cg04223924	2	98552472	TMEM131	-0.121282	0.00265834	0.685533	-0.216551	1.64569e-05	0.0223518	-0.0579226	0.167601	0.974373
cg04365699	3	177320997		-0.080199	0.102477	0.95289	-0.273971	1.41952e-06	0.00433804	-0.0946223	0.0744007	0.95495
cg04385523	3	44381576	C3orf23;C3orf23;C3orf23	-0.123928	0.00476107	0.742115	-0.265672	2.6325e-07	0.00138134	-0.0820855	0.0547141	0.94691
cg04497992	16	616212	NHLRC4	-0.0515939	0.00180762	0.638762	-0.103785	2.78163e-08	0.000288602	-0.0210917	0.195803	0.977614
cg04577253	11	46414401		-0.0803998	0.109395	0.954448	-0.247383	2.23954e-05	0.0276639	-0.111246	0.0557233	0.94691
cg04741118	12	96720813	CDK17;CDK17	-0.0564601	0.191636	0.971585	-0.229821	5.38915e-06	0.0107904	-0.0977842	0.0208514	0.904779
cg04766834	13	45912168	TPT1;SNORA31	-0.147593	0.000392709	0.484941	-0.241745	1.83101e-06	0.00519179	-0.0247627	0.57751	0.993019
cg04800394	3	197677333	RPL35A;IQCG;IQCG	-0.0682549	0.0277157	0.884807	-0.202879	6.6761e-06	0.0124907	-0.112154	0.00484277	0.844104
cg04856396	17	3589140	P2RX5;P2RX5	0.0412258	0.136878	0.96171	0.130717	3.36365e-05	0.0362158	0.0533357	0.0663878	0.952268
cg04923746	1	211666304	RD3;RD3	-0.128493	0.00231875	0.676814	-0.240395	1.21852e-06	0.00388999	-0.0533503	0.215828	0.979607
cg04933530	14	77419754		-0.104077	0.0112643	0.827045	-0.231366	1.01967e-05	0.0168048	-0.100693	0.0241426	0.912836
cg04983687	16	88558223	ZFPM1	-0.1371	4.74852e-06	0.144517	-0.224593	4.02745e-08	0.000334288	-0.0269119	0.446563	0.990764
cg05161682	13	111107167	COL4A2	0.0575077	0.0180584	0.854384	0.136642	4.79971e-06	0.0100052	0.0588448	0.027919	0.91866
cg05168344	22	21340160	LZTR1	0.0209689	0.122382	0.956885	0.0751036	5.29644e-05	0.0496488	0.0559516	0.000633409	0.756962
cg05184016	7	149543136	ZNF862	-0.0458327	0.0059043	0.766908	-0.0970233	1.05015e-06	0.00349933	-0.019882	0.207186	0.978495
cg05193538	1	26097991	MAN1C1	-0.109909	9.23938e-05	0.314166	-0.129968	2.7852e-05	0.0321894	-0.0329067	0.226342	0.980589
cg05215575	16	4838722	SEPT12;SEPT12;LOC440335;LOC440335	-0.0336826	0.343075	0.986284	-0.174103	2.42068e-05	0.029381	-0.0586979	0.101629	0.963273
cg05218678	6	46081541		-0.0832401	0.0171604	0.851438	-0.190945	9.83344e-06	0.016504	-0.042638	0.267034	0.982428
cg05219423	10	11291279	CUGBP2;CUGBP2;CUGBP2;CUGBP2	-0.122799	0.0081482	0.797376	-0.226796	6.60676e-06	0.012479	-0.0423179	0.350552	0.985976
cg05270552	11	95969587	MAML2	0.307796	0.029224	0.889329	0.634308	3.28351e-05	0.0355205	0.136975	0.211512	0.97889
cg05300717	11	65546210	DKFZp761E198	-0.049015	0.0235085	0.872979	-0.140934	2.40905e-08	0.000265943	-0.0522429	0.0121376	0.882817
cg05308970	16	85318420		0.0700295	0.0255014	0.879047	0.142072	1.81293e-05	0.0239551	0.0742609	0.0174973	0.897766
cg05318169	6	33255475	WDR46;WDR46	-0.0789753	0.0095456	0.812745	-0.154449	4.14183e-05	0.0425855	-0.04943	0.101383	0.963273
cg05373256	11	61522178	C11orf9;DKFZP434K028;C11orf9	-0.0780545	0.0209145	0.867579	-0.173246	4.64067e-05	0.045955	-0.0428607	0.251816	0.981775
cg05480350	8	128972681	MIR1205;PVT1	-0.110015	0.00180285	0.638762	-0.232879	9.76759e-07	0.00332764	-0.0415713	0.268081	0.982469
cg05486260	8	139206451	FAM135B	-0.148193	0.00155974	0.628457	-0.23892	3.2396e-05	0.0352777	-0.040383	0.369494	0.987338
cg05719902	7	138348774	SVOPL;SVOPL	-0.180184	0.00444326	0.736749	-0.332857	2.2566e-05	0.0276927	-0.130381	0.100056	0.963273
cg05767306	3	49459143	AMT;AMT;AMT;AMT;AMT	0.040028	0.277662	0.982297	0.15782	5.27494e-05	0.049549	0.103853	0.00815026	0.873987
cg05851148	5	179225977	MGAT4B;MIR1229;MGAT4B	-0.0266064	0.0157334	0.846608	-0.0502204	5.20866e-05	0.0492872	-0.00306793	0.777887	0.99744
cg05875421	14	91709951	GPR68	0.106433	0.0144901	0.841559	0.222695	4.1597e-05	0.0426732	0.0584144	0.204013	0.978408
cg06043201	8	28974428	KIF13B	0.0417631	0.10118	0.952126	0.148215	5.7088e-07	0.00230632	0.0725321	0.00495422	0.846193
cg06070625	3	69812798	MITF;MITF	-0.110507	0.0186139	0.855735	-0.256441	2.85905e-07	0.00146651	-0.0640634	0.157152	0.97369
cg06266582	11	64871778	C11orf2	-0.0238856	0.616876	0.99889	-0.237062	4.9529e-06	0.0101393	-0.118912	0.020839	0.904779
cg06391412	3	71295684	FOXP1;FOXP1	-0.195527	6.48181e-06	0.148839	-0.312594	8.68621e-10	2.77654e-05	-0.0266903	0.558889	0.992348
cg06398474	2	240291509	HDAC4	0.116842	0.000514391	0.507184	0.176041	1.40009e-05	0.0205013	0.0372318	0.288023	0.983408
cg06528816	2	47242277	TTC7A	-0.170742	6.55053e-05	0.276889	-0.271235	2.90421e-07	0.00147312	-0.0307618	0.48081	0.991732
cg06558622	7	149543177	ZNF862	-0.107794	3.35503e-07	0.0305473	-0.126943	8.04296e-06	0.0143426	-0.0124107	0.565207	0.992518
cg06559756	17	65464297	PITPNC1;PITPNC1	-0.0869007	0.01566	0.84616	-0.172799	3.81597e-05	0.0400469	-0.0428598	0.222241	0.979669
cg06647928	5	73612203		-0.0459646	0.204201	0.974109	-0.166461	3.27487e-05	0.0355111	-0.0534713	0.153766	0.973024
cg06648780	3	105133817	ALCAM	-0.161667	0.000415906	0.48945	-0.264899	8.07852e-06	0.01435	-0.0614971	0.169753	0.974623
cg06680065	12	71835739	LGR5	-0.136197	0.00544589	0.757277	-0.287633	1.98009e-06	0.00541487	-0.0885012	0.115257	0.967165
cg06809298	6	75953853	COX7A2;COX7A2	-0.205037	0.0550853	0.925031	-0.607308	4.00151e-06	0.00908827	-0.198821	0.0867161	0.960795
cg06824199	1	47157809	KIAA0494	-0.115798	0.00183297	0.638762	-0.216548	2.59504e-05	0.0306729	-0.0507412	0.207212	0.978495
cg06864151	7	1913918	MAD1L1;MAD1L1;MAD1L1	-0.222689	4.60116e-05	0.256128	-0.271669	3.24561e-05	0.0352777	0.0536171	0.366887	0.987124
cg06866208	16	67560245		-0.0677608	0.0170874	0.851438	-0.145198	2.47002e-05	0.0295957	-0.0466072	0.105851	0.964268
cg06958964	10	45494806	C10orf25;ZNF22	-0.169285	0.000608425	0.523937	-0.262205	5.07839e-06	0.0103038	0.00954187	0.861476	0.998765
cg06996254	12	47427791		-0.104235	0.0176886	0.853468	-0.223805	4.87098e-06	0.0101076	-0.0138218	0.752193	0.997042
cg07092805	13	21005388	CRYL1	0.0897208	0.00135295	0.603439	0.161236	3.25396e-06	0.00754048	0.0449434	0.125848	0.968378
cg07177867	15	52030746	LYSMD2;LYSMD2	-0.148605	1.04206e-05	0.15495	-0.236714	5.53147e-09	9.71227e-05	0.00528526	0.885617	0.998834
cg07209977	1	15224956	KIAA1026;KIAA1026	-0.018098	0.5474	0.997155	-0.145014	4.27245e-05	0.0434403	-0.0468779	0.129201	0.968804
cg07313835	1	167342724	POU2F1	-0.0486503	0.221662	0.975139	-0.214446	6.78554e-06	0.0126436	-0.0971061	0.0142562	0.891488
cg07376535	18	905450	ADCYAP1;ADCYAP1	0.0845761	0.0160201	0.848688	0.198102	4.79893e-06	0.0100052	0.0814135	0.0208978	0.904779
cg07386061	3	52492874	NISCH	-0.100764	0.0104121	0.820229	-0.251711	4.10194e-07	0.00181805	-0.0850691	0.0395201	0.938543
cg07410597	3	66404129	SLC25A26;SLC25A26;SLC25A26	-0.144046	0.00116013	0.587372	-0.254036	8.99098e-06	0.0155473	-0.0579233	0.230667	0.980661
cg07456681	16	15146876	NTAN1	-0.0480308	0.168115	0.967644	-0.16931	2.72748e-05	0.0317636	-0.0770215	0.0254772	0.914045
cg07577997	1	116653561	C1orf161	-0.0898727	0.00185129	0.639287	-0.155826	1.66052e-05	0.0223518	-0.0369934	0.221592	0.979607
cg07584558	19	42703228	DEDD2	0.107362	0.00110933	0.584549	0.186787	7.16319e-07	0.00267939	0.00867419	0.801139	0.997624
cg07602847	11	65545237	DKFZp761E198;DKFZp761E198	-0.0639026	0.0416751	0.911513	-0.171051	2.14005e-05	0.0269135	-0.0662386	0.0439527	0.94179
cg07636225	11	63466987	RTN3;RTN3;RTN3;RTN3	-0.049112	0.241141	0.978556	-0.280735	1.24131e-08	0.000169466	-0.137873	0.00101478	0.819859
cg07644446	3	64034134		0.0955831	0.010065	0.814982	0.193161	2.1117e-05	0.0266304	0.0499861	0.174631	0.975191
cg07765167	17	36451845	MRPL45	-0.103998	0.00912374	0.807568	-0.195816	5.35228e-05	0.0499306	-0.0416933	0.258376	0.981851
cg07766916	16	88853845		-0.0695273	0.264503	0.981652	-0.296495	2.86742e-05	0.0328074	-0.102506	0.110656	0.965932
cg07819010	11	46619375		-0.0990622	0.00691058	0.781586	-0.217086	9.41331e-07	0.00325553	-0.0146274	0.719279	0.996369
cg07828169	5	132114623	2017-09-08	-0.047764	0.194404	0.972076	-0.186916	4.98031e-05	0.0477643	-0.052778	0.195668	0.977614
cg07895206	5	6492253	UBE2QL1	-0.0766715	0.0736442	0.937658	-0.230733	1.39373e-05	0.0205013	-0.101731	0.0232704	0.91057
cg07908654	13	41631052		-0.0969898	0.0298385	0.89048	-0.247679	1.00458e-06	0.00339708	-0.092432	0.0453977	0.94179
cg07912766	18	45458698	SMAD2;SMAD2	-0.0677806	0.0542343	0.924171	-0.188961	4.74209e-05	0.0467565	-0.0579656	0.136705	0.969171
cg07948085	10	9805340		-0.0558001	0.230004	0.976423	-0.230791	5.00168e-05	0.0478686	-0.0810028	0.136641	0.969171
cg07970948	7	149543165	ZNF862	-0.0404279	0.00574913	0.766134	-0.084794	6.0256e-06	0.0117554	-0.0233241	0.124981	0.968227
cg08067346	16	25011481	ARHGAP17;ARHGAP17	-0.199143	0.00193451	0.644868	-0.373755	4.70397e-07	0.00202587	-0.040013	0.484643	0.991793
cg08077807	14	62001072	PRKCH	-0.195198	0.000715085	0.528652	-0.361906	3.62764e-08	0.000324719	-0.0839262	0.152451	0.97272
cg08085199	16	69170548	CIRH1A	-0.0671634	0.0911389	0.946251	-0.195071	2.16632e-05	0.027073	-0.0396253	0.262207	0.982257
cg08105265	17	56274480	EPX	-0.122405	0.010646	0.823297	-0.271719	3.21156e-05	0.0352777	-0.068565	0.185035	0.975986
cg08106792	1	153509323	S100A6	0.0622471	0.00169303	0.636649	0.109978	4.9241e-06	0.0101393	0.00370082	0.853466	0.998403
cg08122652	3	122281939	PARP9;PARP9;DTX3L;PARP9;PARP9;PARP9;PARP9	-0.1466	0.0153654	0.84616	-0.253454	4.75601e-05	0.0467711	0.0188931	0.76957	0.99744
cg08223760	1	43291209	ERMAP;ERMAP	-0.271812	2.86838e-07	0.0305473	-0.268867	0.000571579	0.207255	0.0808191	0.231871	0.980671
cg08268892	6	157131429	ARID1B;ARID1B;ARID1B	-0.11756	0.00228672	0.673497	-0.222171	4.54452e-06	0.00969454	-0.0139604	0.721516	0.996369
cg08377000	4	90033921	TIGD2	-0.168981	0.00503471	0.747831	-0.329038	6.16691e-06	0.0119799	-0.0407341	0.492844	0.991793
cg08404225	3	3151899	IL5RA;IL5RA;IL5RA;IL5RA;IL5RA;IL5RA;IL5RA;IL5RA;IL5RA;IL5RA;IL5RA;IL5RA	-0.0918195	0.0388983	0.907346	-0.245291	4.58419e-06	0.00973369	-0.0516048	0.252758	0.981775
cg08473858	11	118476352	PHLDB1	-0.0378037	0.0393029	0.908252	-0.093353	2.17646e-05	0.027073	-0.0215476	0.216558	0.979607
cg08698681	3	171091657	TNIK;TNIK;TNIK;TNIK;TNIK;TNIK;TNIK;TNIK;TNIK	-0.115148	0.00280058	0.685533	-0.293126	1.14308e-10	6.34339e-06	-0.124807	0.00108873	0.819859
cg08770358	13	48876684	RB1	-0.165053	0.00449089	0.738163	-0.376116	3.58427e-08	0.000324719	-0.109421	0.0604432	0.948507
cg08773180	11	57157607	PRG2	-0.139721	0.000149985	0.36615	-0.241404	3.27102e-07	0.00162311	-0.0332863	0.407725	0.989116
cg08817867	17	19656554		-0.0700627	0.00761228	0.791304	-0.122857	5.24953e-05	0.0494119	-0.0798646	0.0045338	0.83869
cg08832745	7	102531568	FBXL13;FBXL13	-0.160057	0.000145188	0.365391	-0.223514	2.73913e-05	0.0318181	-0.0249518	0.533388	0.992052
cg08884974	15	31505024		0.00054128	0.991781	0.999931	-0.187974	4.82773e-05	0.0471932	-0.0850454	0.0405843	0.940609
cg08889930	3	127317798	MCM2	-0.128549	0.000810989	0.553852	-0.215346	6.52867e-06	0.0124704	0.0055075	0.891328	0.998834
cg08922729	1	21913557		0.0871194	0.0329178	0.898446	0.227624	9.2202e-06	0.0158238	0.104084	0.0203212	0.903951
cg08924256	8	107672853	OXR1;OXR1	-0.16749	0.00510564	0.750674	-0.260029	4.43951e-05	0.0446408	-0.0467408	0.406121	0.989116
cg08940169	16	88540241	ZFPM1	-0.0829719	8.90943e-08	0.0293194	-0.124729	7.36652e-11	6.34339e-06	-0.0104676	0.507913	0.991793
cg08945642	5	205863	CCDC127	-0.130819	0.00615909	0.772995	-0.29	3.75471e-07	0.00174906	-0.0788346	0.129021	0.968804
cg08969102	5	133563532		-0.172391	0.00157624	0.629277	-0.318176	4.05863e-07	0.00181649	-0.0709503	0.152484	0.97272
cg09147843	16	53467612	RBL2	-0.133583	0.00396858	0.727302	-0.257251	9.27259e-06	0.0158542	-0.0711756	0.134778	0.969171
cg09187107	17	79006087	FLJ90757	0.0473377	5.38809e-05	0.264361	0.0907959	8.00187e-10	2.77654e-05	0.0191259	0.132058	0.969171
cg09227119	20	35504403	C20orf118	-0.0927956	0.00354354	0.715785	-0.202919	1.41436e-07	0.000807091	-0.0343733	0.305545	0.983784
cg09241885	20	35504371	C20orf118	-0.0284124	0.465329	0.994084	-0.186506	1.3481e-05	0.0203683	-0.0799654	0.0474208	0.94262
cg09249800	1	6341287	ACOT7;ACOT7;ACOT7;ACOT7	-0.129512	1.16241e-06	0.0758082	-0.198793	2.54012e-09	5.52191e-05	-0.0239662	0.409378	0.989116
cg09312904	1	117281442		0.0956423	0.0169874	0.851438	0.178945	2.34885e-05	0.0285942	0.0204386	0.567997	0.992626
cg09332506	1	160309220	COPA;COPA	-0.195775	7.23063e-05	0.287644	-0.361733	2.62248e-11	2.99299e-06	-0.0998074	0.0258758	0.915326
cg09377531	8	141046469	TRAPPC9;TRAPPC9	-0.250535	4.24732e-05	0.251813	-0.435661	5.60226e-10	2.325e-05	-0.0734618	0.224902	0.98037
cg09423651	3	136618442	NCK1	-0.210383	2.64317e-05	0.232046	-0.258243	2.96375e-05	0.0335992	0.0351017	0.517377	0.991793
cg09480190	16	85671771	KIAA0182;KIAA0182	-0.0365814	0.0453011	0.914438	-0.0959744	4.28205e-05	0.0434403	-0.0290611	0.117613	0.968015
cg09565310	5	112541553	MCC;MCC	-0.157314	0.000965504	0.576164	-0.332123	2.9683e-08	0.000301126	-0.0721058	0.131055	0.968804
cg09597192	6	32141591	AGPAT1;AGPAT1	-0.117033	0.00302137	0.689993	-0.231112	1.12269e-05	0.0179204	-0.0506967	0.222357	0.979669
cg09705784	17	76565232	DNAH17	-0.125141	0.00738223	0.788481	-0.279133	3.53645e-06	0.00807217	-0.0712255	0.13612	0.969171
cg09764807	10	43820676		-0.142007	0.00608572	0.770642	-0.24463	4.33419e-05	0.0438717	-0.0580503	0.285806	0.983408
cg09793866	8	38009548	STAR;STAR	-0.0645079	0.0693406	0.934267	-0.171658	3.71891e-05	0.0391182	-0.0286656	0.44949	0.990881
cg10036013	7	4778839	FOXK1	-0.0903457	0.0279244	0.884807	-0.21885	2.33543e-05	0.0285068	-0.0530034	0.187568	0.976499
cg10065736	12	117440120	FBXW8;FBXW8	-0.125858	0.000413786	0.489375	-0.211278	6.50984e-07	0.00247652	-0.0126539	0.730771	0.996846
cg10101109	12	112455255	ERP29;ERP29	-0.177594	0.000460747	0.493299	-0.265475	8.67848e-06	0.0152378	-0.102256	0.0474682	0.942757
cg10142520	11	65344604	EHBP1L1	0.0201553	0.0960714	0.950072	0.0597089	1.43756e-05	0.0206373	0.0211721	0.105051	0.964268
cg10159529	3	3152530	IL5RA;IL5RA;IL5RA;IL5RA;IL5RA;IL5RA	-0.121273	0.00584001	0.766752	-0.289278	5.06599e-08	0.000391981	-0.0846092	0.0651477	0.951184
cg10163122	6	34633133	C6orf106;C6orf106	-0.167118	0.0238274	0.873899	-0.311638	4.37099e-05	0.0441463	-0.109902	0.115538	0.967209
cg10298741	16	73019173	ZFHX3;ZFHX3	-0.176403	2.08835e-05	0.207252	-0.263338	1.02783e-06	0.00345012	-0.0445771	0.270948	0.982503
cg10298992	16	75103853	ZNRF1	-0.0918366	0.000403691	0.484941	-0.139427	6.66686e-06	0.0124907	-0.0133422	0.58859	0.993462
cg10315334	17	34207332	CCL5;CCL5	0.0367019	0.245744	0.978941	0.170771	4.88715e-05	0.0473683	0.0847066	0.0174223	0.897766
cg10402121	10	126487101		-0.0858839	0.0333868	0.899526	-0.258808	1.70928e-09	4.10689e-05	-0.0820017	0.0482305	0.942757
cg10433549	17	41472748		-0.0888756	0.0358296	0.901743	-0.23722	1.41908e-05	0.0205782	-0.0738187	0.0599994	0.948507
cg10454864	2	112654017		-0.179702	0.00664925	0.778592	-0.456448	1.73749e-07	0.000967302	-0.133188	0.0489707	0.942837
cg10462803	16	85568220		-0.0990043	0.0203734	0.864866	-0.196836	4.09857e-05	0.0424274	-0.0292143	0.504301	0.991793
cg10619318	5	135470751	SMAD5;SMAD5;SMAD5OS;SMAD5	-0.0742864	0.0172991	0.851453	-0.158897	9.77173e-06	0.016461	-0.0175135	0.570159	0.992723
cg10704177	1	62209607	INADL	-0.166694	7.32496e-05	0.288271	-0.265769	1.99271e-06	0.00541487	-0.0293401	0.524048	0.991854
cg10718130	8	145539893	DGAT1	-0.0578059	0.0564875	0.925057	-0.148161	2.42675e-05	0.029381	-0.0633372	0.0325619	0.928594
cg10977795	6	158507753	SYNJ2	0.0852681	0.0215667	0.869779	0.188377	2.10506e-05	0.0266201	0.0311243	0.411958	0.989116
cg11137709	14	21508979	RNASE7	-0.110711	0.031747	0.896366	-0.26851	1.49186e-05	0.0211427	-0.0836608	0.109821	0.965556
cg11142013	13	24441476	MIPEP	-0.0269737	0.329617	0.985106	-0.150116	9.11663e-06	0.0157051	-0.0773738	0.0113949	0.880602
cg11202380	1	33473905	AK2	-0.12293	0.00213109	0.655573	-0.179176	3.19674e-05	0.0352777	0.00558712	0.899449	0.998952
cg11385906	8	28745680	INTS9;INTS9;INTS9	-0.100256	0.00113513	0.587246	-0.175185	1.78856e-05	0.0237355	-0.063822	0.0517293	0.944525
cg11398517	20	42355625	GTSF1L;GTSF1L;GTSF1L;GTSF1L	-0.0495553	0.101841	0.952726	-0.178329	2.65315e-06	0.0065118	-0.092145	0.00414347	0.83869
cg11432630	7	100224149	TFR2	0.14218	0.000177901	0.392967	0.21987	2.04256e-06	0.00548504	0.0293714	0.452817	0.991087
cg11456013	6	111192760		-0.195383	2.21581e-07	0.0305473	-0.28592	1.04662e-09	2.98621e-05	-0.0115988	0.766453	0.99744
cg11525409	2	74236068		0.0466936	0.130191	0.959559	0.157037	8.64441e-06	0.0152366	0.0416745	0.209292	0.978732
cg11668148	15	72636405	HEXA	-0.211667	0.00141712	0.610893	-0.399585	8.07218e-07	0.00290162	-0.148167	0.0146775	0.892138
cg11683482	1	44678623	DMAP1;DMAP1;DMAP1	-0.0514196	0.0979808	0.95082	-0.151148	4.85601e-05	0.0473682	-0.0177028	0.564194	0.992422
cg11699125	1	6341327	ACOT7;ACOT7;ACOT7;ACOT7	-0.118346	0.000102527	0.323842	-0.183679	1.33138e-08	0.000173655	-0.0275222	0.36186	0.987036
cg11738543	12	93967225	SOCS2	-0.0829951	0.07487	0.938806	-0.234014	2.43279e-05	0.029381	-0.154912	0.000421628	0.713816
cg11770323	13	80066032	NDFIP2;NDFIP2	-0.166037	1.19868e-05	0.15495	-0.317617	1.72143e-12	2.61951e-07	-0.0797748	0.0436228	0.94179
cg11791710	10	129172535	DOCK1	-0.0919931	0.037281	0.905473	-0.240487	8.46824e-06	0.014984	-0.0864348	0.0620807	0.948507
cg11830436	10	34943260	PARD3	-0.138294	0.00027552	0.452402	-0.268965	1.73069e-08	0.000218765	-0.0807206	0.0448436	0.94179
cg11949606	21	34096277	SYNJ1;SYNJ1;SYNJ1;SYNJ1	-0.097189	0.0205066	0.865928	-0.244514	2.02753e-06	0.00547688	-0.104217	0.013632	0.890435
cg11988722	20	33416959		-0.118613	0.00241651	0.682422	-0.24871	1.23389e-06	0.0039117	-0.0398013	0.331336	0.984863
cg12043019	22	50356277	PIM3	0.0346266	0.479398	0.994318	0.259894	5.02899e-05	0.0480293	0.106267	0.0279942	0.918684
cg12074090	8	6360436	ANGPT2;ANGPT2;ANGPT2;MCPH1	-0.153573	0.000769006	0.540094	-0.248036	6.91567e-06	0.0128337	-0.0321256	0.468736	0.991366
cg12077754	2	75089669	HK2	-0.228508	0.000138553	0.363512	-0.401756	2.44672e-08	0.000265943	-0.0576781	0.3498	0.985864
cg12098228	7	2106321	MAD1L1;MAD1L1;MAD1L1	0.0612371	0.141667	0.963099	0.211482	6.43233e-06	0.01239	0.0438742	0.318885	0.984025
cg12104982	19	5592815	SAFB2	-0.113128	6.65714e-05	0.278814	-0.180315	1.13723e-07	0.000657163	-0.0313977	0.254162	0.981775
cg12213680	6	24877462	FAM65B;FAM65B;FAM65B	-0.0834103	0.000593067	0.51966	-0.126763	1.43009e-05	0.0205948	-0.0339888	0.15048	0.97272
cg12220466	12	48922312		-0.0177415	0.7688	0.998989	-0.288235	1.41992e-05	0.0205782	-0.155899	0.00814574	0.873987
cg12298872	1	228352449	C1orf69	-0.0752359	0.0321618	0.896366	-0.142322	2.99093e-05	0.033797	-0.0323888	0.341865	0.98515
cg12380764	1	206971195	IL19	-0.0573482	0.0177672	0.853527	-0.103851	2.03514e-05	0.0260243	-0.0228939	0.294929	0.983408
cg12402318	15	52135487	TMOD3	-0.169269	0.00100167	0.581776	-0.254822	1.37388e-05	0.0204965	-0.0339524	0.471838	0.991568
cg12524168	5	76028910	F2R	0.0587204	0.0574818	0.925133	0.17677	3.99795e-07	0.00181649	0.070912	0.0127469	0.885041
cg12580580	10	74544059	CCDC109A	-0.0772466	0.0826194	0.943829	-0.310043	4.29776e-06	0.00949794	-0.165382	0.0125508	0.882817
cg12614529	4	154269418	MND1	-0.163173	3.07875e-05	0.245462	-0.274689	8.15254e-08	0.000516909	-0.0808512	0.0586109	0.948096
cg12838007	14	70086897	KIAA0247	-0.0652627	0.0420673	0.912071	-0.160318	3.29138e-05	0.0355215	-0.0603654	0.0868282	0.960795
cg12841375	6	52929709	FBXO9;FBXO9	-0.0499062	0.125979	0.957922	-0.146168	3.23255e-05	0.0352777	-0.0800461	0.0135626	0.890435
cg13007701	8	13078829	DLC1	0.0962356	0.0336785	0.900368	0.205637	4.76407e-05	0.0467711	0.0713861	0.099119	0.963273
cg13020518	22	49575834		0.0617287	0.0330162	0.898942	0.170081	9.51677e-07	0.00326656	0.106837	0.000404968	0.713225
cg13054523	17	81055722		-0.0767321	0.000421459	0.489495	-0.144668	1.63965e-06	0.00482916	-0.0317515	0.181604	0.975986
cg13209388	1	6355060	ACOT7;ACOT7;ACOT7;ACOT7	-0.189638	6.0998e-05	0.27619	-0.317025	6.98936e-06	0.0128793	-0.0455945	0.416856	0.98956
cg13233042	11	63432489	ATL3	-0.133441	0.0138509	0.839398	-0.299079	1.40564e-05	0.0205013	-0.0577697	0.333159	0.984863
cg13423371	9	138701748	CAMSAP1	-0.166732	0.0012343	0.587372	-0.25783	9.68291e-06	0.0164326	-0.0700702	0.163334	0.97373
cg13424284	1	26624129	UBXN11;UBXN11;UBXN11	-0.0691438	0.0141131	0.83975	-0.186842	5.57886e-07	0.00227395	-0.0775596	0.0203865	0.903951
cg13429095	1	206913187		-0.0557402	0.0507531	0.919173	-0.141423	1.11196e-05	0.0178741	-0.047235	0.139002	0.969678
cg13458609	9	130608923	ENG;ENG	-0.0397674	0.0396341	0.908701	-0.0851124	4.18666e-05	0.0428534	-0.0126525	0.490784	0.991793
cg13480658	1	4795012	AJAP1;AJAP1	-0.0209455	0.0961404	0.950072	-0.0629024	1.54232e-05	0.021423	-0.0242989	0.0609958	0.948507
cg13576859	9	97403129	FBP1;FBP1	-0.147886	8.86371e-05	0.311262	-0.256128	4.44337e-08	0.000355869	-0.0752689	0.0551061	0.94691
cg13585029	9	95886330	NINJ1	-0.110709	0.00489601	0.74744	-0.238367	8.3896e-07	0.00296896	-0.0609564	0.127114	0.968804
cg13587621	9	95497984	BICD2;BICD2	-0.15257	0.00047236	0.493299	-0.232465	4.93419e-05	0.0476616	-0.0466639	0.306756	0.983784
cg13628444	9	134883788	MED27	-0.110336	0.00171161	0.637854	-0.221049	7.23258e-08	0.000479025	-0.0277305	0.413146	0.989271
cg13638867	11	2241568		-0.0232193	0.627875	0.99889	-0.223946	4.49781e-05	0.0450287	-0.128877	0.00860766	0.87742
cg13645296	15	64275810	DAPK2	-0.144907	0.000307372	0.463373	-0.238793	7.21918e-07	0.00267939	-0.0233905	0.574517	0.992823
cg13692121	5	169408916	FAM196B;DOCK2	0.0574123	0.177896	0.969934	0.211568	3.37399e-05	0.0362416	0.124835	0.00941375	0.87742
cg13710553	7	129598625		-0.0816867	0.000466836	0.493299	-0.157942	8.285e-09	0.000130274	-0.0519934	0.0188279	0.902142
cg13753183	9	32989852	APTX;APTX;APTX;APTX;APTX;APTX;APTX	-0.124449	0.000146358	0.365391	-0.237183	3.06709e-08	0.000303477	-0.0382231	0.270294	0.982503
cg13792581	20	43590115	TOMM34	-0.1012	0.0339722	0.900647	-0.250003	4.51576e-06	0.00969454	-0.0532852	0.264144	0.982257
cg13821176	8	126448338	TRIB1	-0.0513304	0.090288	0.945966	-0.185835	8.38796e-07	0.00296896	-0.0853293	0.0111112	0.880602
cg13835688	9	130859454	SLC25A25;SLC25A25;SLC25A25;SLC25A25	-0.203624	3.60026e-05	0.245462	-0.378866	1.25058e-10	6.34339e-06	-0.0816174	0.103396	0.963779
cg13850063	9	138362321		-0.0490717	0.0100497	0.814952	-0.0970953	5.55483e-06	0.0109801	-0.0313212	0.0974318	0.963273
cg13876325	17	16190098	PIGL	-0.0706552	0.0898274	0.945966	-0.199718	1.27994e-05	0.0196738	-0.0969864	0.0173156	0.897766
cg13953978	9	132600788	USP20;USP20;USP20	-0.169634	7.39192e-05	0.288419	-0.241692	1.39889e-05	0.0205013	-0.0151392	0.737025	0.996895
cg13968233	1	197564458	DENND1B;DENND1B	-0.0194934	0.702179	0.998989	-0.306	4.55983e-08	0.000358901	-0.123303	0.0191741	0.902934
cg14011077	9	138362327		-0.0319255	0.0214494	0.869311	-0.074482	1.50124e-05	0.0211427	-0.0142643	0.328087	0.984671
cg14025883	9	5436224	C9orf46	-0.132184	0.0029686	0.688744	-0.316018	2.82596e-10	1.29009e-05	-0.12206	0.00613245	0.86584
cg14084609	14	100610407	EVL	-0.220433	3.28323e-05	0.245462	-0.359274	1.77308e-08	0.000218765	-0.0471847	0.384454	0.987843
cg14109551	6	118903047	C6orf204;C6orf204	-0.0730023	0.0447097	0.914388	-0.190462	3.83749e-05	0.0401803	-0.0633283	0.117267	0.968015
cg14120984	14	104627874	KIF26A	0.0386604	0.111064	0.954876	0.125583	1.92758e-06	0.00538761	0.0494608	0.0369938	0.935252
cg14206516	1	175099472	TNN	-0.184466	0.000148073	0.365391	-0.288381	4.19508e-08	0.000341983	-0.0760057	0.115453	0.967165
cg14226212	9	113530240	MUSK;MUSK;MUSK	-0.12027	0.00133353	0.601068	-0.263327	6.12971e-08	0.000444174	-0.0447282	0.302239	0.983408
cg14355482	21	22373039	NCAM2	-0.115038	0.0171311	0.851438	-0.338509	5.16869e-09	9.43829e-05	-0.11176	0.0203177	0.903951
cg14480531	17	55700565	MSI2;MSI2	-0.141221	0.00227748	0.673497	-0.248343	2.49307e-05	0.0297937	-0.0550858	0.270447	0.982503
cg14588003	15	93361889		-0.129325	0.00786853	0.793753	-0.325311	8.56103e-09	0.000130274	-0.12406	0.0115349	0.880602
cg14611258	17	17946468	C17orf39	-0.175969	0.000169566	0.390955	-0.309024	3.52781e-07	0.00170808	-0.055643	0.254433	0.981775
cg14613878	20	35504198	C20orf118	-0.173122	3.03343e-05	0.245462	-0.331452	1.20696e-10	6.34339e-06	-0.0796136	0.0825328	0.95904
cg14634136	2	127410953		-0.133556	0.00379691	0.72464	-0.216731	4.56232e-05	0.045376	-0.0450977	0.323282	0.984335
cg14684068	11	63894400	MACROD1	-0.0288814	0.32601	0.985106	-0.150647	1.01375e-05	0.0167678	-0.0755798	0.00703385	0.86584
cg14769121	7	98722470	SMURF1;SMURF1	-0.122169	0.00551658	0.759727	-0.296628	1.26214e-08	0.000169466	-0.0630422	0.173157	0.975191
cg14890343	17	78161178	CARD14;CARD14	-0.120181	0.008509	0.803144	-0.232364	5.43529e-06	0.0108353	-0.0741693	0.103779	0.964227
cg15044010	7	104897205	SRPK2;SRPK2	-0.195747	0.00126582	0.588601	-0.392594	6.48127e-07	0.00247652	-0.119161	0.0687823	0.952384
cg15075897	12	7862691	DPPA3	-0.190394	0.000284756	0.452402	-0.317873	1.21576e-06	0.00388999	-0.052995	0.321019	0.984109
cg15215978	6	167135152	RPS6KA2	-0.119683	0.0126148	0.831116	-0.286241	2.33729e-06	0.00596091	-0.101421	0.0460459	0.942073
cg15227982	10	104535854	C10orf26;C10orf26	-0.0646324	0.011068	0.827045	-0.133035	1.29635e-05	0.0197926	-0.0604551	0.0102938	0.880602
cg15254424	3	50388344	TUSC4;CYB561D2;CYB561D2;TUSC4	0.0736506	0.0217557	0.869977	0.142107	1.54392e-05	0.021423	0.099033	0.00109955	0.819859
cg15344640	5	176774729	LMAN2	-0.156544	0.00035681	0.47416	-0.264724	5.0297e-07	0.00212604	-0.0236987	0.611349	0.994232
cg15384400	4	36257279		0.183184	0.000578966	0.516089	0.351381	3.31717e-08	0.000309047	0.0700699	0.172497	0.975191
cg15482717	11	70053254	FADD	-0.105391	0.00510279	0.750674	-0.24125	1.04487e-07	0.000627628	-0.0336356	0.395359	0.988616
cg15491950	3	132004600		-0.10338	0.00974182	0.813209	-0.257554	1.67501e-06	0.00490169	-0.0780885	0.0534904	0.945348
cg15526939	5	82805379	VCAN;VCAN;VCAN;VCAN	-0.0746891	0.141163	0.962926	-0.269209	4.39345e-06	0.00959649	-0.105474	0.032951	0.929442
cg15700636	11	57156050	PRG2	-0.186473	5.18639e-06	0.144832	-0.273344	5.47893e-07	0.00226667	-0.0144204	0.744142	0.996972
cg15867698	14	69438267	ACTN1;ACTN1;ACTN1	-0.133819	1.9957e-05	0.20706	-0.238751	9.58065e-09	0.000141087	-0.0707039	0.0383962	0.937297
cg15915361	12	46855182		-0.0485949	0.338631	0.985966	-0.258883	1.63908e-05	0.0223361	-0.128957	0.0225026	0.90872
cg15937266	1	3777197	DFFB	-0.033298	0.378939	0.98914	-0.190016	4.13887e-05	0.0425855	-0.0946293	0.0123693	0.882817
cg15998761	2	191300784	MFSD6	-0.128275	0.0249233	0.877825	-0.283018	2.62609e-05	0.0308187	-0.0796795	0.0979028	0.963273
cg16050349	3	138478129	PIK3CB	-0.118681	0.00695032	0.782083	-0.221941	2.25415e-05	0.0276927	-0.007573	0.858153	0.998441
cg16111924	7	138348981	SVOPL;SVOPL	-0.0593114	0.000868388	0.560645	-0.120367	9.76669e-06	0.016461	-0.0515226	0.0340511	0.931941
cg16177693	1	27240669	NR0B2	-0.0786979	0.0201737	0.863896	-0.198384	7.29064e-06	0.0132074	-0.0578845	0.125132	0.968262
cg16225800	8	126591906		-0.103621	0.00018249	0.392967	-0.155009	8.82918e-06	0.0153841	-0.0231208	0.43622	0.990276
cg16238026	7	30323735	ZNRF2	-0.0655541	0.0577018	0.925404	-0.162233	1.00329e-05	0.0166751	-0.0665162	0.0546609	0.94691
cg16263722	1	29523841	MECR;MECR	-0.132746	0.000467807	0.493299	-0.239557	1.08361e-06	0.00357706	-0.0400049	0.299839	0.983408
cg16286925	5	108339964	FER	-0.0740187	0.0634246	0.929575	-0.193033	1.19849e-05	0.0188016	-0.0158164	0.672773	0.995906
cg16335893	12	123634159		-0.103645	0.013016	0.833813	-0.223808	4.67091e-06	0.00982641	-0.0639826	0.103457	0.963831
cg16362140	5	10708717	DAP	-0.141631	0.0012767	0.590982	-0.342165	9.12309e-10	2.77654e-05	-0.0966096	0.0418913	0.940646
cg16386158	2	102927397	IL1RL1	-0.21494	0.000272462	0.452402	-0.348905	8.45642e-07	0.00296959	-0.0600026	0.31158	0.983784
cg16409452	14	100610186	EVL	-0.143257	0.0127263	0.833174	-0.313883	4.53856e-06	0.00969454	-0.0763061	0.195403	0.97757
cg16458752	6	33255241	WDR46;WDR46	-0.0947299	0.00956733	0.813172	-0.176428	1.21444e-05	0.0189865	-0.0267572	0.422749	0.990218
cg16576811	18	55888640	NEDD4L;NEDD4L;NEDD4L;NEDD4L;NEDD4L;NEDD4L;NEDD4L;NEDD4L;NEDD4L	-0.0740765	0.0181375	0.854384	-0.172368	4.409e-05	0.0444319	-0.0624392	0.0729118	0.954048
cg16604391	12	125359749		-0.134606	0.00966156	0.813209	-0.269928	1.97432e-05	0.0254079	-0.0885083	0.107175	0.964483
cg16618493	1	154978980	ZBTB7B	0.0633221	0.00621765	0.772995	0.117902	4.93382e-06	0.0101393	0.033434	0.133753	0.969171
cg16643422	8	13111435	DLC1	-0.140936	0.00111791	0.584584	-0.236202	1.46502e-05	0.0208459	-0.0183279	0.698323	0.996198
cg16809457	6	90399677	MDN1	-0.0795731	0.0356541	0.901743	-0.193049	1.2438e-05	0.0193132	-0.0849754	0.0260761	0.915326
cg16812352	16	4049855	ADCY9	-0.102688	0.0329368	0.898565	-0.260746	7.0588e-06	0.0129081	-0.0735932	0.138303	0.96955
cg16850945	3	52488229	TNNC1;NISCH	0.0114131	0.503512	0.995248	0.100008	3.45768e-06	0.00793204	0.0647723	0.000281291	0.697896
cg17110052	19	51858208	ETFB;ETFB	-0.0806217	0.0132227	0.834615	-0.16386	3.53683e-05	0.037549	-0.0765315	0.022888	0.909688
cg17240934	10	695301	C10orf108;C10orf108;DIP2C	0.00701961	0.869198	0.99925	0.235067	4.95326e-05	0.0476616	0.131469	0.00844924	0.87742
cg17266278	4	3526751	LRPAP1	-0.0525331	3.29337e-05	0.245462	-0.0687174	1.72678e-06	0.00498019	-0.00373666	0.759923	0.997146
cg17332306	17	76259456		-0.0656632	0.0713905	0.935415	-0.226182	1.38482e-06	0.00433007	-0.140621	0.000268155	0.687724
cg17374802	17	56270828	EPX	-0.131094	0.00181462	0.638762	-0.240899	3.24119e-06	0.00754048	-0.0439285	0.327872	0.984548
cg17413460	12	96367302	HAL	-0.101174	0.0236922	0.873348	-0.251741	1.42538e-06	0.00433804	-0.107549	0.0294267	0.92264
cg17417004	1	54819992	SSBP3;SSBP3;SSBP3	-0.0592252	0.123519	0.956885	-0.188308	1.52373e-05	0.0212723	-0.101183	0.0107517	0.880602
cg17493193	1	26440896	PDIK1L;PDIK1L;PDIK1L	-0.0839589	0.0363183	0.901743	-0.172312	4.61134e-05	0.0457638	-0.076435	0.0558046	0.94691
cg17506458	19	52602607		-0.0997818	0.0992968	0.951074	-0.305601	1.88903e-05	0.0244991	-0.132619	0.0199226	0.903418
cg17519037	17	36452075	MRPL45	-0.115689	0.00791012	0.794483	-0.228527	1.04985e-05	0.0170732	-0.0451375	0.29606	0.983408
cg17554875	5	179520998		-0.0950501	0.00590799	0.766908	-0.154771	2.93542e-05	0.0334179	-0.0641398	0.077802	0.957795
cg17738684	2	102927278	IL1RL1	-0.185707	0.00386083	0.726629	-0.377488	1.35729e-05	0.0203683	-0.0565632	0.399649	0.98881
cg17738841	2	31094363		-0.125144	0.0072615	0.788219	-0.270859	5.55606e-06	0.0109801	-0.106155	0.030716	0.925332
cg17784922	7	142659425	KEL;KEL	-0.11965	0.00614715	0.772995	-0.250405	8.03785e-06	0.0143426	-0.0737302	0.134034	0.969171
cg17851165	5	1548899		-0.0991307	0.0271103	0.883709	-0.231628	2.75658e-05	0.0319395	-0.0717636	0.127216	0.968804
cg17940256	2	65179622		-0.101059	0.0254156	0.879047	-0.250636	2.97097e-06	0.00706398	-0.0446955	0.304977	0.983711
cg17971251	1	177907297	SEC16B	-0.170992	2.17491e-05	0.21125	-0.315168	4.21394e-09	8.0155e-05	-0.0662188	0.14146	0.970418
cg18011672	2	190522601		-0.0846322	0.0374413	0.906055	-0.223994	3.19438e-06	0.00751688	-0.0937798	0.025537	0.914746
cg18014547	2	20366443		0.0744523	0.104437	0.953244	0.212306	3.95022e-05	0.0411718	0.0926368	0.0378874	0.937297
cg18151262	19	1254251	MIDN	-0.0478892	0.0207727	0.866768	-0.0966619	3.48636e-05	0.0371862	-0.00924681	0.667438	0.995643
cg18196453	6	125334555	RNF217	0.0390936	0.250467	0.980395	0.153877	3.53669e-05	0.037549	0.0870871	0.0100961	0.880303
cg18307978	7	30953124	AQP1	-0.0920037	0.00178363	0.638762	-0.210735	6.66012e-13	2.61951e-07	-0.0616875	0.0332715	0.93092
cg18337287	19	930871	ARID3A	-0.163836	0.00111361	0.584549	-0.309027	1.06687e-07	0.000632519	-0.111727	0.0236253	0.911933
cg18368116	14	21436271		-0.128799	0.00481627	0.742284	-0.31602	9.7055e-08	0.000590758	-0.0953891	0.0553327	0.94691
cg18421167	17	56276490	EPX	-0.17406	1.79392e-05	0.194036	-0.253499	7.64256e-07	0.00279114	-0.0215163	0.644253	0.995103
cg18550847	14	100610570	EVL	-0.187945	3.863e-05	0.248382	-0.248761	1.42622e-05	0.0205948	0.0315283	0.522139	0.991793
cg18593727	3	121380792	HCLS1	-0.175107	3.71006e-05	0.245462	-0.37214	1.1911e-12	2.61951e-07	-0.0743499	0.0649721	0.951184
cg18665334	2	231735434	ITM2C;ITM2C;ITM2C	-0.0738809	0.00488004	0.74744	-0.131529	2.55413e-06	0.00637155	-0.039107	0.138142	0.969441
cg18666454	7	150651937	KCNH2;KCNH2;KCNH2	-0.114628	0.0144302	0.84154	-0.296435	5.20662e-08	0.000396149	-0.0935922	0.05244	0.944657
cg19066141	12	48395868	COL2A1;COL2A1	-0.0261665	0.425712	0.992042	-0.15868	1.65127e-05	0.0223518	-0.0611878	0.078909	0.958241
cg19097880	11	128160637		-0.114687	0.000402611	0.484941	-0.161505	1.8156e-05	0.0239551	-0.0040847	0.898216	0.998945
cg19232164	11	114320724	REXO2	-0.186095	0.000152878	0.368221	-0.273426	2.29306e-06	0.00591419	0.0276744	0.591806	0.993741
cg19247032	21	43786727	TFF1	-0.134243	0.00315562	0.697303	-0.277408	9.18758e-07	0.00320172	-0.0987219	0.0378421	0.937295
cg19253809	15	74689005		-0.088966	0.00406757	0.729386	-0.172111	2.67684e-06	0.00653482	-0.0514892	0.134022	0.969171
cg19266635	12	46776389		-0.0548512	0.0151496	0.84616	-0.109046	5.06358e-05	0.0482587	-0.021383	0.371388	0.987415
cg19328051	18	12380944		-0.0196578	0.540646	0.996784	-0.171443	5.01763e-06	0.010226	-0.0701193	0.0486901	0.942837
cg19334657	6	89849755		-0.11673	0.0420828	0.912071	-0.225814	1.53532e-06	0.00458101	-0.0601717	0.335413	0.985052
cg19434937	12	7104184	LPCAT3	-0.207315	4.01487e-07	0.0305473	-0.250559	3.3464e-06	0.00771552	0.00270319	0.957888	0.999944
cg19448292	20	35504064	C20orf118	-0.154913	0.000855414	0.560269	-0.283502	2.00223e-08	0.000240538	-0.0671057	0.161173	0.97373
cg19564017	6	135721680	AHI1;AHI1;AHI1;AHI1	-0.278174	0.000426718	0.492129	-0.455997	3.5545e-07	0.00170808	-0.0468639	0.497504	0.991793
cg19726536	5	179225537	MIR1229;MGAT4B;MGAT4B	-0.0583594	0.00110793	0.584549	-0.0879784	5.21468e-05	0.0492872	-0.0140957	0.386465	0.987843
cg19764973	11	59525433	STX3	-0.169717	0.00110763	0.584549	-0.333737	1.8989e-07	0.00103199	-0.12245	0.0227526	0.90872
cg19781376	15	93616072	RGMA;RGMA;RGMA;RGMA;RGMA;RGMA	-0.0291633	0.217604	0.975139	-0.125092	2.23084e-06	0.00585292	-0.0448364	0.056425	0.94691
cg19805160	1	159870731	CCDC19	-0.154068	0.00119048	0.587372	-0.277925	1.56431e-06	0.00463719	-0.0260937	0.589361	0.993462
cg19851574	6	167178233	RPS6KA2	-0.0469928	0.0341902	0.901109	-0.108432	3.43035e-05	0.0367606	-0.00634922	0.772517	0.99744
cg19861623	14	91099023	TTC7B	-0.146088	0.00223549	0.669176	-0.292836	2.37462e-07	0.00126051	-0.0770228	0.139699	0.969818
cg19911880	8	131353969	ASAP1	-0.082583	0.0419921	0.912071	-0.227496	1.42207e-06	0.00433804	-0.0447101	0.292128	0.983408
cg19928703	13	30143971	SLC7A1	-0.220455	5.82987e-05	0.26883	-0.366235	1.4826e-09	3.76015e-05	-0.033273	0.55996	0.992348
cg19993680	10	5576748		-0.0839866	0.0234137	0.872605	-0.253639	3.90843e-08	0.000330417	-0.0683269	0.0803912	0.958241
cg20212304	6	33083808	HLA-DPB2	0.0476969	0.0176685	0.853468	0.106126	2.24214e-05	0.0276639	0.0400448	0.0741048	0.954912
cg20226253	20	34022914	GDF5	-0.0826039	0.0635169	0.929575	-0.225658	1.16506e-05	0.0183402	-0.0684964	0.123581	0.968015
cg20259557	8	145643626	SLC39A4	-0.105569	0.00393238	0.726629	-0.217073	6.05362e-07	0.00236201	-0.0507377	0.153539	0.972817
cg20263733	3	130616293	ATP2C1;ATP2C1;ATP2C1;ATP2C1	-0.211338	3.66525e-05	0.245462	-0.26247	4.27616e-05	0.0434403	0.00806021	0.883527	0.998834
cg20290167	17	81040724	METRNL	-0.0527457	0.182208	0.970873	-0.258585	6.72033e-08	0.000457898	-0.116544	0.00807881	0.872097
cg20315954	17	15137304	PMP22;PMP22;PMP22	-0.11636	0.00941994	0.812745	-0.25077	1.49117e-06	0.00447856	-0.066084	0.151545	0.97272
cg20317437	1	24172120	FUCA1	-0.144836	0.00315725	0.697303	-0.284503	4.27151e-06	0.00949794	-0.0591776	0.259364	0.981851
cg20472746	13	42039334	C13orf15	0.0939029	0.0726927	0.936239	0.282234	2.89468e-06	0.00691863	0.0451946	0.37517	0.987553
cg20554142	8	143150271		0.0396137	0.0496483	0.917581	0.117462	3.03689e-06	0.00718331	0.0605671	0.0135419	0.890435
cg20673965	19	44220148	IRGC	-0.095414	0.0153992	0.84616	-0.238564	6.74328e-07	0.00254413	-0.102224	0.00620841	0.86584
cg20840540	6	42363749	TRERF1	-0.096731	0.013887	0.839398	-0.236847	4.03074e-06	0.00910934	-0.0695117	0.0745104	0.955004
cg20873136	2	129037710	HS6ST1	-0.0323969	0.313074	0.984579	-0.154414	2.15062e-05	0.0269721	-0.0769001	0.0199058	0.903418
cg20885063	17	17939419	ATPAF2	-0.151155	0.00434221	0.734757	-0.343178	2.8407e-07	0.00146651	-0.0870571	0.114592	0.966884
cg20891917	7	112064031	IFRD1	-0.109601	0.00539689	0.757047	-0.195326	6.99668e-06	0.0128793	-0.0237232	0.538907	0.992052
cg21067750	15	40641778	PHGR1	-0.0865591	0.0512341	0.919173	-0.227654	6.59241e-06	0.012479	-0.0491573	0.291879	0.983408
cg21073459	19	54604098	OSCAR;OSCAR;OSCAR;OSCAR;OSCAR;OSCAR;OSCAR;OSCAR	-0.0388351	0.0117343	0.828123	-0.0853943	2.66571e-05	0.0311236	-0.0197872	0.274458	0.983025
cg21141030	15	65576504	PARP16	-0.165565	0.000871954	0.560645	-0.277219	4.03254e-07	0.00181649	-0.0602671	0.204017	0.978408
cg21179618	9	139424642	NOTCH1	-0.0790856	0.0135586	0.837573	-0.169364	3.57879e-05	0.0378186	-0.0745717	0.0264123	0.916265
cg21196930	6	23214308		0.00125675	0.962469	0.999886	0.11293	2.46316e-05	0.0295957	0.0933705	2.33913e-05	0.537245
cg21220721	1	6341230	ACOT7;ACOT7;ACOT7;ACOT7	-0.13582	1.13151e-05	0.15495	-0.237704	1.99643e-09	4.55699e-05	-0.0359728	0.279574	0.983062
cg21239317	7	23640510	CCDC126	-0.0860414	0.0125495	0.830953	-0.192173	1.40174e-05	0.0205013	-0.0874398	0.0162883	0.897484
cg21247590	2	198070356		-0.0963656	0.0216038	0.869779	-0.215657	4.61687e-06	0.00975769	-0.0787054	0.0325091	0.928241
cg21498475	12	113737469	SLC24A6	-0.043281	0.148771	0.964999	-0.214562	1.23936e-09	3.32815e-05	-0.0882365	0.0037972	0.83869
cg21627181	6	25754190	SLC17A4	-0.0943081	0.020269	0.864645	-0.230132	1.40123e-05	0.0205013	-0.0902547	0.028191	0.918684
cg21723861	17	39686628		-0.1169	0.00675096	0.778779	-0.216382	2.86425e-05	0.0328074	-0.0629207	0.168354	0.974373
cg21727145	15	101458127	LRRK1	0.077698	0.0278909	0.884807	0.173017	3.64774e-05	0.0384582	0.0346471	0.349587	0.985864
cg21824343	17	1633714	WDR81;WDR81;WDR81;WDR81	-0.0378568	0.00181587	0.638762	-0.0621671	3.05036e-05	0.0341336	-0.00159174	0.895061	0.998868
cg21868031	1	207925112	CD46;CD46;CD46;CD46;CD46;CD46;CD46;CD46;CD46;CD46;CD46;CD46;CD46;CD46	0.0386497	0.362216	0.987856	0.227241	1.71845e-05	0.0230057	0.128334	0.0105019	0.880602
cg21932513	1	17751974	RCC2;RCC2	-0.0447223	0.198458	0.972835	-0.192032	3.23325e-05	0.0352777	-0.0778791	0.0454896	0.94179
cg22027879	19	49469965	FTL	-0.218746	5.71062e-06	0.144832	-0.246421	3.92524e-05	0.0410051	0.0507875	0.288958	0.983408
cg22242539	17	1665220	SERPINF1	-0.0648511	0.000941943	0.573346	-0.104692	6.61519e-06	0.012479	-0.00312707	0.855243	0.998403
cg22312249	17	72779428	TMEM104	-0.118754	0.00266067	0.685533	-0.217299	2.58014e-05	0.030594	-0.0691805	0.102361	0.963273
cg22483743	6	42387064	TRERF1	-0.092299	0.0108717	0.826655	-0.193903	4.37285e-06	0.00959649	-0.0454266	0.180961	0.975986
cg22485289	20	4795999	RASSF2;RASSF2	-0.0516391	0.340117	0.986049	-0.260245	4.49313e-05	0.0450287	-0.142337	0.00691661	0.86584
cg22532234	19	40229215	CLC	-0.0796742	0.0287112	0.887145	-0.21579	4.80395e-07	0.00204959	-0.0916347	0.0117423	0.880602
cg22609785	10	80416672		-0.152373	0.00063363	0.524539	-0.250672	2.17126e-05	0.027073	-0.0332884	0.461607	0.991087
cg22704057	2	74425085	MTHFD2;MTHFD2	-0.0436272	0.315934	0.984579	-0.21743	4.88277e-05	0.0473683	-0.114402	0.0159216	0.897484
cg22805603	2	32490766	NLRC4;NLRC4	0.0598839	0.0122489	0.830027	0.161051	8.37685e-08	0.000523855	0.0521771	0.0443239	0.94179
cg22930808	3	122281881	PARP9;PARP9;DTX3L;PARP9;PARP9;PARP9;PARP9	-0.112599	0.120801	0.956387	-0.280736	4.04634e-05	0.041982	-0.00200537	0.971874	0.999951
cg22945457	1	225612608	LBR;LBR	-0.103255	0.00126959	0.589007	-0.179367	2.05182e-05	0.0261643	-0.0424206	0.240202	0.981539
cg22996170	19	12895529		-0.129223	0.00932343	0.811217	-0.281718	1.16139e-05	0.0183402	-0.0774674	0.10665	0.964268
cg23072086	1	21606767	ECE1;ECE1;ECE1;ECE1	0.111724	0.00189654	0.644868	0.170465	2.10157e-05	0.0266201	0.0417231	0.234802	0.980956
cg23085143	7	138349443	SVOPL;SVOPL	-0.271781	0.000822922	0.553852	-0.523886	1.09699e-07	0.000642038	-0.161646	0.128341	0.968804
cg23090159	7	65419194	VKORC1L1	-0.105885	0.00907349	0.807443	-0.198298	9.62421e-06	0.0163939	-0.0621804	0.104899	0.964268
cg23160522	15	75015787	CYP1A1	-0.072621	0.0303718	0.892521	-0.164896	3.56797e-05	0.0377918	-0.0444571	0.156989	0.97369
cg23196129	2	120937418		-0.0592124	0.0573714	0.925088	-0.187114	2.80548e-06	0.00674072	-0.0872116	0.0052191	0.85501
cg23205629	8	33421410	RNF122	-0.1488	0.000349576	0.47416	-0.219089	2.2666e-06	0.00587915	-0.0227067	0.582788	0.993066
cg23288563	14	21491469	NDRG2;NDRG2;NDRG2;NDRG2;NDRG2;NDRG2;NDRG2;NDRG2	0.0497684	0.0471358	0.916351	0.177714	1.15592e-05	0.0183227	0.0774843	0.0304757	0.924855
cg23299618	11	45102239		0.0743558	0.0053769	0.756413	0.152571	1.08915e-06	0.00357706	0.0636549	0.0227417	0.90872
cg23432896	3	186490915		-0.046691	0.239421	0.978178	-0.182878	3.11168e-05	0.0345625	-0.0842821	0.0149235	0.893336
cg23441018	15	34657364	LPCAT4	0.122568	9.2905e-05	0.314166	0.158103	1.24921e-05	0.0193315	0.0343244	0.267272	0.982428
cg23498922	20	47731131	STAU1;STAU1;STAU1;STAU1;STAU1	-0.101111	0.00417515	0.729386	-0.178897	3.01402e-05	0.0339738	-0.0269194	0.459584	0.991087
cg23516680	10	103923333	NOLC1	-0.0860715	0.0196337	0.859661	-0.203399	1.7481e-05	0.0233343	-0.0672584	0.103678	0.964227
cg23534301	17	28098852	SSH2	-0.131944	0.000283731	0.452402	-0.19933	1.05091e-05	0.0170732	-0.0289671	0.404017	0.988993
cg23584308	14	105352991	KIAA0284;KIAA0284	-0.0791051	0.0258247	0.88099	-0.189112	6.32816e-07	0.00244821	-0.0372471	0.279109	0.983062
cg23706836	8	6407997	ANGPT2;ANGPT2;ANGPT2;MCPH1	-0.138964	0.00394499	0.726629	-0.266051	4.21897e-06	0.00944126	-0.0402915	0.430595	0.990276
cg23709430	17	3977501	ZZEF1	-0.0771923	0.0315929	0.896202	-0.192364	1.76451e-06	0.00503451	-0.105191	0.0019288	0.820779
cg23791626	17	65542892	PITPNC1;PITPNC1	-0.0682673	0.0483491	0.917096	-0.217225	6.01499e-07	0.00236201	-0.110769	0.00223798	0.821417
cg23824902	1	9619882	SLC25A33	-0.130396	0.00122632	0.587372	-0.26194	7.87455e-08	0.000506314	-0.0947133	0.0150081	0.893524
cg23871276	7	1577697	MAFK	-0.0401112	0.000510447	0.507184	-0.0595561	1.85936e-05	0.0243902	0.00275919	0.819994	0.998116
cg23933289	1	178998656	FAM20B	-0.159365	0.00057011	0.516089	-0.239698	1.66444e-05	0.0223518	-0.0168318	0.716796	0.996369
cg23943829	5	132009111	IL4;IL4	-0.0323985	0.372701	0.988649	-0.216515	3.22856e-08	0.000307058	-0.108853	0.00404848	0.83869
cg24058805	1	66777579	PDE4B;PDE4B;PDE4B	-0.0278996	0.000112667	0.339322	-0.0420339	8.88359e-06	0.01542	0.00357988	0.66539	0.995643
cg24198439	14	23589255	CEBPE	-0.0785343	0.013658	0.838607	-0.201569	2.78465e-06	0.00672607	-0.106671	0.0021585	0.820779
cg24368962	11	111570978	SIK2	-0.187318	0.000280191	0.452402	-0.35411	8.10807e-10	2.77654e-05	-0.0865603	0.101162	0.963273
cg24371033	2	241807924	AGXT	-0.0335898	0.156624	0.967081	-0.10853	4.94846e-05	0.0476616	-0.0353215	0.122056	0.968015
cg24376793	1	202545589	PPP1R12B;PPP1R12B;PPP1R12B;PPP1R12B	-0.143666	0.00647255	0.777803	-0.29831	3.04561e-05	0.0341336	-0.0742191	0.208124	0.978495
cg24459209	11	57148215	PRG3	-0.193928	0.000491068	0.49445	-0.27857	2.60023e-05	0.0306729	-0.0193362	0.710735	0.996369
cg24477886	17	36813798		0.065395	0.0499024	0.917816	0.214019	8.98774e-08	0.000554462	0.124089	0.000335317	0.713225
cg24491618	7	150649807	KCNH2;KCNH2;KCNH2	-0.173419	3.97298e-05	0.248454	-0.260619	9.94668e-06	0.0166329	-0.0252218	0.589028	0.993462
cg24512544	8	141588943	EIF2C2;EIF2C2	-0.0774559	0.0185636	0.855735	-0.156038	7.16534e-06	0.0130322	-0.0329244	0.300237	0.983408
cg24527461	17	79419366	BAHCC1	0.0771517	0.0359394	0.901743	0.187406	1.56097e-05	0.021594	0.0706373	0.0528129	0.944657
cg24576940	7	150648283	KCNH2;KCNH2;KCNH2	-0.161144	0.00335431	0.706258	-0.286777	1.98952e-06	0.00541487	-0.0642653	0.180488	0.975986
cg24627621	6	42109176	C6orf132	-0.105484	0.00232522	0.677404	-0.21826	6.24859e-08	0.000445713	-0.0419004	0.205626	0.978408
cg24678767	15	74902976	CLK3	-0.0969017	6.25286e-05	0.27619	-0.173236	3.87791e-08	0.000330417	-0.0289474	0.276049	0.983062
cg24686074	10	102497666		-0.000563743	0.980684	0.999886	0.120443	2.96607e-05	0.0335992	0.0656659	0.042386	0.941214
cg24804436	6	42955017	PPP2R5D;PPP2R5D;PPP2R5D	-0.0845977	0.0866273	0.945966	-0.239548	1.50982e-05	0.0211427	-0.0759192	0.107907	0.964901
cg24830730	7	150653195	KCNH2;KCNH2;KCNH2	-0.0405355	0.0347909	0.901457	-0.0953253	1.50929e-05	0.0211427	-0.0370559	0.0479482	0.942757
cg24836822	7	150648840	KCNH2;KCNH2;KCNH2	-0.143378	5.39702e-05	0.264361	-0.203188	4.09255e-06	0.00920346	-0.0179123	0.613159	0.994311
cg24958325	2	241498221	ANKMY1;ANKMY1;DUSP28	-0.0623707	0.0533941	0.923703	-0.141015	2.86461e-05	0.0328074	-0.0821447	0.0131419	0.890067
cg25066772	14	93136682	RIN3	-0.0666335	0.0214195	0.869269	-0.146106	2.26101e-06	0.00587915	-0.0514796	0.0675837	0.952384
cg25087851	11	60623918	GPR44	-0.102649	0.00533754	0.753916	-0.20433	1.29397e-05	0.0197926	-0.0404618	0.305714	0.983784
cg25173129	17	56269410	EPX	-0.153621	3.32445e-05	0.245462	-0.265496	3.45736e-09	6.86231e-05	-0.0389259	0.329711	0.984863
cg25332499	11	64756382	BATF2	-0.0713489	0.0353383	0.901743	-0.205238	3.16872e-07	0.00158963	-0.0466781	0.157569	0.97369
cg25424525	4	146096030	OTUD4;OTUD4;OTUD4	-0.141778	0.00803406	0.795151	-0.265818	7.06887e-06	0.0129081	-0.0833308	0.0843297	0.959624
cg25479097	13	113305704	C13orf35	-0.0891292	0.100546	0.951759	-0.301561	1.35666e-06	0.00427125	-0.0753216	0.187546	0.976499
cg25600606	11	33308345	HIPK3;HIPK3	0.0950616	0.00248012	0.685089	0.166666	1.07529e-05	0.0174073	0.0430427	0.174138	0.975191
cg25668878	3	46256527		-0.0744941	0.0459375	0.91489	-0.185265	2.65857e-05	0.0311198	-0.0843498	0.0245184	0.913231
cg25689499	17	81042554	METRNL	-0.105529	0.00553751	0.760573	-0.206042	1.12633e-06	0.00367274	-0.0185201	0.628947	0.994701
cg25709050	17	29817279	RAB11FIP4	-0.105191	0.00378692	0.724223	-0.226463	8.79582e-06	0.0153841	-0.0422131	0.313973	0.98385
cg25854298	10	73936754	ASCC1	-0.145841	0.00412901	0.729386	-0.316891	2.49703e-06	0.00626333	-0.0922374	0.110133	0.96573
cg25888881	10	31288287	ZNF438;ZNF438;ZNF438;ZNF438;ZNF438;ZNF438;ZNF438;ZNF438;ZNF438	0.0642533	0.019125	0.85834	0.153649	6.26137e-06	0.0121119	0.0356675	0.218689	0.979607
cg25939647	15	40173065	GPR176	-0.130094	0.00339979	0.709021	-0.308239	7.62593e-09	0.000124333	-0.0853263	0.0773481	0.957654
cg25948982	20	45179157	C20orf123	-0.120214	2.75617e-05	0.234638	-0.163562	1.70616e-06	0.00496104	-0.0454157	0.106512	0.964268
cg26023748	10	54515151		-0.0291746	0.360828	0.987766	-0.145681	4.53271e-05	0.0452788	-0.0847364	0.00626047	0.86584
cg26102082	17	47590272	NGFR	-0.151252	4.02412e-06	0.144296	-0.210991	6.57047e-08	0.000457898	0.00135101	0.971376	0.999951
cg26103369	14	75153307	KIAA0317	-0.210558	0.000280161	0.452402	-0.350533	2.12998e-06	0.0056206	-0.0388834	0.521308	0.991793
cg26109393	14	96741054		-0.0364681	0.0814894	0.942761	-0.124221	3.42208e-07	0.00167981	-0.0336478	0.103723	0.964227
cg26118698	21	47599972	C21orf56;C21orf56	-0.0447419	0.187776	0.971332	-0.172396	1.31297e-05	0.0199616	-0.039545	0.281839	0.983062
cg26180383	8	129061048	MIR1207;PVT1	-0.0400803	0.149696	0.965386	-0.152889	5.6212e-06	0.011061	-0.0876204	0.000683464	0.781706
cg26252077	1	61607055	NFIA;NFIA;NFIA;NFIA	-0.140466	0.000388189	0.484941	-0.229688	2.5702e-06	0.00637679	-0.0492296	0.21892	0.979607
cg26385286	6	10527815	GCNT2	-0.189559	0.00274156	0.685533	-0.3514	7.4584e-07	0.00274585	-0.0723947	0.230087	0.980656
cg26396815	4	102878132	BANK1;BANK1;BANK1	-0.253117	1.28449e-07	0.0293194	-0.256147	5.35932e-05	0.0499306	0.0144523	0.791687	0.997478
cg26423824	17	25898825	KSR1	-0.170095	1.04044e-05	0.15495	-0.278067	2.29533e-08	0.000261962	-0.0560095	0.170846	0.974772
cg26457013	19	55740188	TMEM86B;TMEM86B	-0.111259	0.000891158	0.561323	-0.236939	1.07559e-08	0.000153444	-0.0576721	0.091993	0.960795
cg26508444	10	126330845	FAM53B	-0.0879523	0.00289457	0.685679	-0.154814	1.85422e-05	0.0243902	-0.0329308	0.282941	0.983194
cg26516974	6	52475065		-0.0750123	0.032898	0.898173	-0.181213	1.22962e-05	0.0191582	-0.0665966	0.0508878	0.943926
cg26547058	8	142243143		-0.0440169	0.000940052	0.572959	-0.0807428	2.60431e-06	0.00642648	-0.0146186	0.295618	0.983408
cg26572165	1	160807694	CD244;CD244;CD244	0.0455532	0.181356	0.970734	0.185172	7.75023e-06	0.0139845	0.0690573	0.0432422	0.94179
cg26661897	1	100732290	RTCD1;RTCD1	0.0527945	0.306679	0.984397	0.295928	1.90736e-06	0.00537492	0.217741	1.82159e-05	0.537245
cg26789365	10	133743048		-0.101833	0.011306	0.827045	-0.174586	5.23509e-05	0.0493778	-0.056886	0.132589	0.969171
cg26791242	1	87596895	LOC339524;LOC339524;LOC339524;LOC339524;LOC339524	-0.0855578	0.0123049	0.830185	-0.184361	5.79804e-06	0.01136	-0.00614107	0.856476	0.998403
cg26803289	1	182760430	NPL	-0.114153	0.0113545	0.827045	-0.241293	1.36082e-05	0.0203683	-0.0344551	0.439893	0.990739
cg26860613	12	6661647	IFFO1;IFFO1	-0.210432	1.43009e-05	0.171804	-0.293233	1.73456e-06	0.00498019	-0.0169654	0.735244	0.996895
cg26872742	5	16792048	MYO10	-0.162639	0.051089	0.919173	-0.432177	1.40434e-05	0.0205013	-0.141267	0.0383158	0.937297
cg26873132	11	9191490	DENND5A	-0.0553121	0.0100838	0.815203	-0.118328	1.91932e-05	0.0248214	-0.0358018	0.0989096	0.963273
cg26899718	16	68404797	SMPD3	-0.0292846	0.273835	0.982116	-0.143724	1.35548e-05	0.0203683	-0.0656851	0.0231941	0.91057
cg26922697	6	33284542	ZBTB22;ZBTB22	-0.0562957	0.0808718	0.941692	-0.152516	3.23018e-05	0.0352777	-0.0532508	0.0672421	0.952384
cg27014783	2	2712909		-0.0853608	0.00977446	0.813209	-0.159217	3.46591e-05	0.0370547	-0.011092	0.731171	0.996891
cg27046460	1	230837380		0.0328403	0.287702	0.982932	0.157152	1.50166e-05	0.0211427	0.0981157	0.0010923	0.819859
cg27061971	5	72746990		-0.0705915	0.0302539	0.892244	-0.154405	1.66471e-05	0.0223518	-0.0523032	0.0686553	0.952384
cg27075898	12	133296313	PGAM5;PGAM5	0.103831	0.00547954	0.758068	0.16302	1.87445e-05	0.0244488	-0.0327132	0.441789	0.990764
cg27469152	17	56282313	EPX	-0.127296	0.00111447	0.584549	-0.298188	8.90786e-11	6.34339e-06	-0.0647757	0.0972571	0.963273
cg27545787	1	2316653	MORN1	-0.0149721	0.424051	0.992024	-0.113066	5.3148e-05	0.0497187	-0.0675631	0.00545211	0.855606
cg27652869	5	172216846		0.0850927	0.00671277	0.778779	0.150725	4.87144e-05	0.0473683	0.0329324	0.330964	0.984863
