# Supplementary material for: Replicated methylation changes associated with eczema herpeticum and allergic response
Source: Clin Epigenetics. 2019 Aug 23;11:122. doi: 10.1186/s13148-019-0714-1 (PMC6706929; doi:10.1186/s13148-019-0714-1)
Supplement: Supplementary file 4 — Tables S5–S8. DMPs significant from severity analysis to follow up on results in Additional file 3: Table S4. (XLSX 120 kb) [file 13148_2019_714_MOESM4_ESM.xlsx]

## Sheet: SuppTableS5 IgE
Supplementary Table S5: Effect sizes, p-values and FDR-adjusted q-values for 335 CpGs significant in
comparison of log tIgE with methyation from model with six cell types (no specific
adjustment for eosinophil fraction) from discovery data set.
CpG	CHR	Pos	Gene	Diff-IgE	Pval-IgE	Qval-IgE
cg00024471	3	188692547	NA	-0.0514171	0.00852305	0.0148398
cg00100703	17	33514885	UNC45B;UNC45B	-0.0665509	0.0109695	0.0184453
cg00170714	17	40724562	MLX;MLX;PSMC3IP;PSMC3IP;MLX	-0.0740779	0.00113731	0.00284907
cg00324520	15	41411926	NA	-0.0437358	0.0204925	0.0318413
cg00340958	20	48328658	B4GALT5	0.0520392	0.0039306	0.00784522
cg00366037	10	76781121	MYST4	-0.0826395	0.0014444	0.003546
cg00381391	3	33837694	NA	-0.113729	1.46165e-05	0.00010163
cg00582671	1	872235	SAMD11	-0.0638464	0.00402281	0.00799676
cg00638845	6	137544615	NA	-0.131184	2.13651e-05	0.000129509
cg00711896	16	30410051	ZNF48	-0.0436128	0.00103706	0.00269416
cg00736681	8	134546052	ST3GAL1;ST3GAL1	-0.143317	9.6874e-08	3.89574e-06
cg00793181	12	52995634	KRT72;KRT72;KRT72	-0.0526906	0.00134309	0.0033306
cg00851028	1	234905772	NA	-0.0411563	0.00379422	0.0076351
cg00869582	16	12564745	SNX29	-0.0635465	0.00675799	0.0123156
cg00944309	5	60142446	NA	-0.0990194	1.47064e-06	2.21465e-05
cg00978785	17	71185631	NA	-0.0504271	0.000281006	0.000992619
cg00986350	16	88540396	ZFPM1	-0.0669989	0.00352434	0.00721021
cg01093786	11	96047698	MAML2	0.0636359	0.00485849	0.00929495
cg01104306	11	4066205	STIM1	-0.0783212	6.67274e-05	0.00031503
cg01126699	14	104625468	KIF26A	-0.0144588	0.0156486	0.0255265
cg01258949	11	47092992	C11orf49;C11orf49;C11orf49;C11orf49	-0.115959	0.000322397	0.0010917
cg01304182	16	30409908	ZNF48	-0.0227406	0.00782513	0.0137711
cg01310029	3	3152374	IL5RA;IL5RA;IL5RA;IL5RA;IL5RA;IL5RA	-0.0760609	0.00814137	0.0142765
cg01376665	15	40641810	PHGR1	-0.0539364	0.00302861	0.00630104
cg01378515	3	124773106	HEG1	-0.047788	0.00683763	0.0123885
cg01445399	1	87596934	LOC339524;LOC339524;LOC339524;LOC339524;LOC339524	-0.0652994	0.00261052	0.00554877
cg01614759	10	45495435	C10orf25;ZNF22	-0.0865487	0.00149459	0.00365096
cg01632240	8	42009223	AP3M2;AP3M2	0.0303638	0.0327579	0.0481561
cg01649647	20	35177530	MYL9;MYL9	-0.0555496	0.000120645	0.000533665
cg01770400	1	173886485	SERPINC1;SERPINC1	-0.0762802	0.000879743	0.00241315
cg01901579	14	95615731	DICER1	-0.109062	1.13698e-05	8.8089e-05
cg01942646	1	27240694	NR0B2	-0.0968188	3.83269e-05	0.000200197
cg01998785	16	55542709	LPCAT2	-0.105865	1.03146e-07	3.89574e-06
cg02065192	1	6421414	ACOT7;ACOT7;ACOT7	-0.0427866	0.00869767	0.0150903
cg02133716	8	128981622	PVT1	-0.0921735	0.000252184	0.000917203
cg02195201	11	19135951	NA	-0.107743	0.000256134	0.000924718
cg02245534	17	81043668	METRNL	-0.0918818	1.1753e-06	2.06097e-05
cg02402423	19	41255444	C19orf54;SNRPA	-0.115926	2.44073e-08	1.49333e-06
cg02427831	19	51961937	SIGLEC8	-0.0568378	0.0148609	0.0244037
cg02464901	2	188851274	NA	-0.0664461	0.00155047	0.00373176
cg02475695	16	616220	NHLRC4	-0.0872262	3.72076e-05	0.00019644
cg02494549	2	161798364	NA	-0.169948	1.11016e-08	1.32873e-06
cg02593766	17	48608677	MYCBPAP;EPN3	0.0435102	0.0182722	0.0291288
cg02596233	7	150970209	SMARCD3;SMARCD3	-0.0519499	0.0216196	0.0332766
cg02752812	6	167101267	RPS6KA2	-0.0531686	0.00722396	0.0128812
cg02859042	12	124971861	NCOR2;NCOR2	-0.0762077	0.00169115	0.00403086
cg02970679	17	56269818	EPX	-0.100425	4.65939e-05	0.000231882
cg02985445	7	97908505	NA	-0.0908447	1.21828e-06	2.06268e-05
cg03131767	12	123446272	ABCB9;ABCB9;ABCB9	-0.10877	7.9002e-08	3.52636e-06
cg03437605	8	22847209	RHOBTB2	-0.0519456	0.0193104	0.0305853
cg03453890	8	145643535	SLC39A4	-0.0535925	0.00187841	0.0043919
cg03493123	5	177029444	B4GALT7	-0.074353	2.14267e-07	6.18854e-06
cg03507593	12	124939480	NCOR2;NCOR2	-0.0177546	0.0179945	0.0287794
cg03651219	10	5576480	NA	-0.0720188	0.00465055	0.00902538
cg03661164	7	148560646	EZH2;EZH2	-0.119827	9.31294e-07	1.90527e-05
cg03678274	1	236017128	LYST;MIR1537	0.0701858	0.00425817	0.00836304
cg03693099	9	135936901	CEL	-0.0757376	3.96588e-06	4.57606e-05
cg03695871	11	65547172	DKFZp761E198	-0.0209345	0.00677234	0.0123156
cg03761216	1	51986130	EPS15	-0.10954	4.64479e-06	4.9528e-05
cg04077085	4	9937674	SLC2A9;SLC2A9	-0.119159	2.20417e-05	0.000130772
cg04079215	1	95095221	NA	0.0468728	0.000865488	0.00238738
cg04120520	16	85708039	KIAA0182;KIAA0182	-0.0624509	0.016614	0.0269224
cg04138746	16	17034451	NA	-0.0993971	0.00253619	0.00548824
cg04217850	3	66428294	SLC25A26;SLC25A26;SLC25A26	-0.0730566	0.000141022	0.000596913
cg04223924	2	98552472	TMEM131	-0.0530176	0.0137405	0.0227157
cg04365699	3	177320997	NA	-0.0780206	0.00517777	0.00974056
cg04385523	3	44381576	C3orf23;C3orf23;C3orf23	-0.0785638	0.000413456	0.00131823
cg04497992	16	616212	NHLRC4	-0.0472997	1.35309e-08	1.32873e-06
cg04741118	12	96720813	CDK17;CDK17	-0.0880135	4.26705e-05	0.000220539
cg04923746	1	211666304	RD3;RD3	-0.0637477	0.00494613	0.00941298
cg04933530	14	77419754	NA	-0.104859	3.92209e-06	4.57606e-05
cg04983687	16	88558223	ZFPM1	-0.0763244	4.67541e-05	0.000231882
cg05184016	7	149543136	ZNF862	-0.0383121	3.00739e-06	3.88587e-05
cg05215575	16	4838722	SEPT12;SEPT12;LOC440335;LOC440335	-0.0560711	0.00286626	0.00601425
cg05218678	6	46081541	NA	-0.0746791	0.000160297	0.000650461
cg05219423	10	11291279	CUGBP2;CUGBP2;CUGBP2;CUGBP2	-0.0849017	0.000397012	0.00127779
cg05300717	11	65546210	DKFZp761E198	-0.0510506	1.72944e-06	2.42615e-05
cg05373256	11	61522178	C11orf9;DKFZP434K028;C11orf9	-0.0665944	0.000611138	0.00176511
cg05480350	8	128972681	MIR1205;PVT1	-0.0746945	0.000124831	0.000547252
cg05851148	5	179225977	MGAT4B;MIR1229;MGAT4B	-0.0139541	0.0175601	0.0281765
cg05875421	14	91709951	GPR68	0.0822433	0.000437661	0.00137751
cg06043201	8	28974428	KIF13B	0.0467595	0.000481034	0.00147617
cg06070625	3	69812798	MITF;MITF	-0.0843321	0.000479764	0.00147617
cg06266582	11	64871778	C11orf2	-0.081651	0.00227969	0.00504202
cg06391412	3	71295684	FOXP1;FOXP1	-0.105163	1.41445e-05	0.000100652
cg06398474	2	240291509	HDAC4	0.0855907	1.1686e-06	2.06097e-05
cg06528816	2	47242277	TTC7A	-0.0996207	1.4696e-05	0.00010163
cg06558622	7	149543177	ZNF862	-0.0378637	0.00093303	0.00250338
cg06559756	17	65464297	PITPNC1;PITPNC1	-0.0527963	0.00486518	0.00929495
cg06647928	5	73612203	NA	-0.0577502	0.00305668	0.00633262
cg06648780	3	105133817	ALCAM	-0.0651722	0.00625101	0.0115385
cg06680065	12	71835739	LGR5	-0.0633808	0.0334372	0.0490079
cg06824199	1	47157809	KIAA0494	-0.0580695	0.00628351	0.0115551
cg06864151	7	1913918	MAD1L1;MAD1L1;MAD1L1	-0.099967	0.00108715	0.00277007
cg06866208	16	67560245	NA	-0.0636096	2.42141e-05	0.000139872
cg06958964	10	45494806	C10orf25;ZNF22	-0.0987087	0.000286213	0.00100199
cg06996254	12	47427791	NA	-0.103301	7.13645e-06	6.48888e-05
cg07177867	15	52030746	LYSMD2;LYSMD2	-0.108719	3.21303e-10	1.5776e-07
cg07209977	1	15224956	KIAA1026;KIAA1026	-0.0526357	0.000909224	0.00248016
cg07313835	1	167342724	POU2F1	-0.062562	0.00220474	0.00498861
cg07386061	3	52492874	NISCH	-0.0562184	0.00982065	0.0168599
cg07410597	3	66404129	SLC25A26;SLC25A26;SLC25A26	-0.0884618	0.000586629	0.00172476
cg07584558	19	42703228	DEDD2	0.0539688	0.00166371	0.0039848
cg07636225	11	63466987	RTN3;RTN3;RTN3;RTN3	-0.094135	1.14821e-05	8.8089e-05
cg07765167	17	36451845	MRPL45	-0.068752	0.000362607	0.00118693
cg07766916	16	88853845	NA	-0.114976	0.000544611	0.0016293
cg07819010	11	46619375	NA	-0.0966502	4.74097e-06	4.9528e-05
cg07828169	5	132114623	2017-09-08	-0.0611248	0.00456566	0.00893123
cg07895206	5	6492253	UBE2QL1	-0.0798043	0.000714377	0.00200434
cg07908654	13	41631052	NA	-0.080989	0.000984134	0.00258401
cg07948085	10	9805340	NA	-0.0916921	0.000966377	0.00256482
cg07970948	7	149543165	ZNF862	-0.0243416	0.00253733	0.00548824
cg08067346	16	25011481	ARHGAP17;ARHGAP17	-0.12891	1.09946e-05	8.70701e-05
cg08077807	14	62001072	PRKCH	-0.137914	3.81613e-06	4.57606e-05
cg08085199	16	69170548	CIRH1A	-0.064551	0.000513094	0.00155512
cg08105265	17	56274480	EPX	-0.0640796	0.0202857	0.0317207
cg08122652	3	122281939	PARP9;PARP9;DTX3L;PARP9;PARP9;PARP9;PARP9	-0.102993	0.00154493	0.00373176
cg08268892	6	157131429	ARID1B;ARID1B;ARID1B	-0.0584842	0.00542687	0.0101315
cg08404225	3	3151899	IL5RA;IL5RA;IL5RA;IL5RA;IL5RA;IL5RA;IL5RA;IL5RA;IL5RA;IL5RA;IL5RA;IL5RA	-0.0990429	1.81952e-05	0.000119118
cg08698681	3	171091657	TNIK;TNIK;TNIK;TNIK;TNIK;TNIK;TNIK;TNIK;TNIK	-0.0885545	7.58241e-06	6.76903e-05
cg08770358	13	48876684	RB1	-0.0813999	0.00725114	0.0128812
cg08773180	11	57157607	PRG2	-0.0948619	6.49606e-06	6.18431e-05
cg08884974	15	31505024	NA	-0.0625144	0.00390539	0.00782672
cg08940169	16	88540241	ZFPM1	-0.0303129	0.00033686	0.00112516
cg08969102	5	133563532	NA	-0.119163	2.79186e-06	3.70488e-05
cg09147843	16	53467612	RBL2	-0.0711495	0.00474091	0.00912859
cg09187107	17	79006087	FLJ90757	0.0170408	0.0102978	0.0174352
cg09227119	20	35504403	C20orf118	-0.0657702	0.000205702	0.000807999
cg09241885	20	35504371	C20orf118	-0.08907	2.05647e-05	0.000129509
cg09249800	1	6341287	ACOT7;ACOT7;ACOT7;ACOT7	-0.067888	8.61724e-06	7.42292e-05
cg09332506	1	160309220	COPA;COPA	-0.103535	6.54958e-06	6.18431e-05
cg09377531	8	141046469	TRAPPC9;TRAPPC9	-0.113294	0.000435188	0.00137751
cg09423651	3	136618442	NCK1	-0.105131	0.000140112	0.000596913
cg09480190	16	85671771	KIAA0182;KIAA0182	-0.0317971	0.00109872	0.00278079
cg09565310	5	112541553	MCC;MCC	-0.101514	5.18381e-05	0.000254525
cg09597192	6	32141591	AGPAT1;AGPAT1	-0.10468	7.27971e-07	1.6247e-05
cg09705784	17	76565232	DNAH17	-0.10519	2.49641e-05	0.000142527
cg09764807	10	43820676	NA	-0.102559	0.000243646	0.000893457
cg10036013	7	4778839	FOXK1	-0.0594206	0.00424881	0.00836304
cg10065736	12	117440120	FBXW8;FBXW8	-0.0718861	0.000280826	0.000992619
cg10101109	12	112455255	ERP29;ERP29	-0.073253	0.00687765	0.0124152
cg10142520	11	65344604	EHBP1L1	0.0201785	0.00253285	0.00548824
cg10159529	3	3152530	IL5RA;IL5RA;IL5RA;IL5RA;IL5RA;IL5RA	-0.0864732	0.000355045	0.00116998
cg10298741	16	73019173	ZFHX3;ZFHX3	-0.0648116	0.00254915	0.00548963
cg10298992	16	75103853	ZNRF1	-0.0389246	0.00297129	0.00620809
cg10402121	10	126487101	NA	-0.0744492	0.00060538	0.00176511
cg10433549	17	41472748	NA	-0.0493655	0.0173821	0.0279824
cg10454864	2	112654017	NA	-0.122553	0.000550844	0.0016293
cg10462803	16	85568220	NA	-0.0539925	0.0213699	0.0329957
cg10704177	1	62209607	INADL	-0.118646	7.13708e-07	1.6247e-05
cg10977795	6	158507753	SYNJ2	0.0639062	0.000939216	0.00250628
cg11137709	14	21508979	RNASE7	-0.0661288	0.0169058	0.027305
cg11385906	8	28745680	INTS9;INTS9;INTS9	-0.0523701	0.00271463	0.00574518
cg11398517	20	42355625	GTSF1L;GTSF1L;GTSF1L;GTSF1L	-0.0667813	4.61541e-05	0.000231882
cg11432630	7	100224149	TFR2	0.0617154	0.0021844	0.00496546
cg11456013	6	111192760	NA	-0.0914344	1.28839e-05	9.30296e-05
cg11668148	15	72636405	HEXA	-0.0775407	0.0153245	0.025081
cg11683482	1	44678623	DMAP1;DMAP1;DMAP1	-0.0866162	2.57626e-08	1.49333e-06
cg11699125	1	6341327	ACOT7;ACOT7;ACOT7;ACOT7	-0.0614521	0.000128561	0.000558613
cg11770323	13	80066032	NDFIP2;NDFIP2	-0.112316	2.73727e-08	1.49333e-06
cg11791710	10	129172535	DOCK1	-0.0741251	0.00216747	0.00494989
cg11830436	10	34943260	PARD3	-0.0646132	0.0022237	0.00500843
cg11949606	21	34096277	SYNJ1;SYNJ1;SYNJ1;SYNJ1	-0.103046	1.65978e-06	2.39691e-05
cg11988722	20	33416959	NA	-0.0793972	0.000209743	0.00081733
cg12043019	22	50356277	PIM3	0.0846363	0.000608312	0.00176511
cg12074090	8	6360436	ANGPT2;ANGPT2;ANGPT2;MCPH1	-0.118117	1.35166e-07	4.67913e-06
cg12077754	2	75089669	HK2	-0.135218	3.3742e-05	0.000184081
cg12104982	19	5592815	SAFB2	-0.0498311	0.00062424	0.00179053
cg12213680	6	24877462	FAM65B;FAM65B;FAM65B	-0.0391078	0.00184337	0.00434339
cg12220466	12	48922312	NA	-0.0812385	0.00770407	0.0136068
cg12298872	1	228352449	C1orf69	-0.0540881	0.00224618	0.00501307
cg12402318	15	52135487	TMOD3	-0.0904342	0.000243835	0.000893457
cg12524168	5	76028910	F2R	0.0443062	0.00245298	0.00540095
cg12614529	4	154269418	MND1	-0.118378	4.77218e-08	2.34314e-06
cg12838007	14	70086897	KIAA0247	-0.06094	0.000697182	0.00196733
cg13054523	17	81055722	NA	-0.0604677	6.67855e-07	1.6247e-05
cg13209388	1	6355060	ACOT7;ACOT7;ACOT7;ACOT7	-0.106821	0.000287742	0.00100199
cg13423371	9	138701748	CAMSAP1	-0.0804904	0.00248167	0.00543974
cg13429095	1	206913187	NA	-0.0576662	0.000530252	0.00159726
cg13576859	9	97403129	FBP1;FBP1	-0.0924267	6.53422e-06	6.18431e-05
cg13585029	9	95886330	NINJ1	-0.0691465	0.000990902	0.00258794
cg13628444	9	134883788	MED27	-0.0979783	9.78807e-09	1.32873e-06
cg13638867	11	2241568	NA	-0.0743672	0.00368061	0.00746768
cg13645296	15	64275810	DAPK2	-0.0754336	0.000632247	0.00179441
cg13753183	9	32989852	APTX;APTX;APTX;APTX;APTX;APTX;APTX	-0.0616535	0.000806366	0.00224958
cg13792581	20	43590115	TOMM34	-0.0902155	0.000335669	0.00112516
cg13835688	9	130859454	SLC25A25;SLC25A25;SLC25A25;SLC25A25	-0.112523	2.13581e-05	0.000129509
cg13850063	9	138362321	NA	-0.0279945	0.00469201	0.00906999
cg13876325	17	16190098	PIGL	-0.0548063	0.0101823	0.0172993
cg13953978	9	132600788	USP20;USP20;USP20	-0.0755791	0.00197356	0.00457084
cg13968233	1	197564458	DENND1B;DENND1B	-0.135537	3.67314e-07	1.00195e-05
cg14011077	9	138362327	NA	-0.0198639	0.0107333	0.0181101
cg14025883	9	5436224	C9orf46	-0.0868123	0.000145929	0.000608924
cg14084609	14	100610407	EVL	-0.117928	3.59103e-05	0.000193758
cg14109551	6	118903047	C6orf204;C6orf204	-0.0597032	0.00502482	0.00948918
cg14206516	1	175099472	TNN	-0.086685	0.000627233	0.00179053
cg14226212	9	113530240	MUSK;MUSK;MUSK	-0.0691111	0.00257564	0.00549844
cg14355482	21	22373039	NCAM2	-0.0635274	0.0121723	0.0203285
cg14480531	17	55700565	MSI2;MSI2	-0.0824628	0.00184882	0.00434339
cg14588003	15	93361889	NA	-0.0570068	0.028014	0.0418081
cg14611258	17	17946468	C17orf39	-0.104817	3.71834e-05	0.00019644
cg14613878	20	35504198	C20orf118	-0.0953287	7.4353e-05	0.000344409
cg14769121	7	98722470	SMURF1;SMURF1	-0.118323	9.11626e-07	1.90527e-05
cg14890343	17	78161178	CARD14;CARD14	-0.0534733	0.0253192	0.0383695
cg15075897	12	7862691	DPPA3	-0.0809251	0.00418089	0.00827749
cg15215978	6	167135152	RPS6KA2	-0.0607239	0.0235985	0.0358726
cg15344640	5	176774729	LMAN2	-0.0801399	0.00117571	0.00293033
cg15384400	4	36257279	NA	0.128204	6.72125e-07	1.6247e-05
cg15482717	11	70053254	FADD	-0.0761429	0.000231498	0.000874351
cg15491950	3	132004600	NA	-0.0770934	0.00024167	0.000893457
cg15526939	5	82805379	VCAN;VCAN;VCAN;VCAN	-0.0710153	0.00533494	0.00999792
cg15700636	11	57156050	PRG2	-0.0981536	2.32241e-05	0.00013575
cg15867698	14	69438267	ACTN1;ACTN1;ACTN1	-0.0585037	0.00112858	0.00284171
cg15998761	2	191300784	MFSD6	-0.0709478	0.00499617	0.0094715
cg16177693	1	27240669	NR0B2	-0.0874117	1.09342e-05	8.70701e-05
cg16225800	8	126591906	NA	-0.0513271	0.000928684	0.00250338
cg16263722	1	29523841	MECR;MECR	-0.0769321	0.000165308	0.000661677
cg16286925	5	108339964	FER	-0.0649173	0.000921048	0.00249853
cg16335893	12	123634159	NA	-0.0874814	1.55085e-05	0.000104311
cg16362140	5	10708717	DAP	-0.121157	1.07493e-06	2.06097e-05
cg16386158	2	102927397	IL1RL1	-0.139277	4.17156e-06	4.65509e-05
cg16409452	14	100610186	EVL	-0.0955263	0.00227869	0.00504202
cg16643422	8	13111435	DLC1	-0.072743	0.00370527	0.00748677
cg16812352	16	4049855	ADCY9	-0.0921655	0.000366607	0.00119208
cg17332306	17	76259456	NA	-0.0694214	0.000442111	0.00138265
cg17374802	17	56270828	EPX	-0.0843911	0.000306201	0.00105136
cg17413460	12	96367302	HAL	-0.0850489	0.000980736	0.00258401
cg17493193	1	26440896	PDIK1L;PDIK1L;PDIK1L	-0.0488212	0.0198322	0.0313106
cg17519037	17	36452075	MRPL45	-0.0604603	0.00844535	0.0147568
cg17738684	2	102927278	IL1RL1	-0.0796712	0.0255856	0.0386539
cg17784922	7	142659425	KEL;KEL	-0.0975893	0.000117018	0.000522328
cg17851165	5	1548899	NA	-0.057838	0.0199647	0.0314188
cg17940256	2	65179622	NA	-0.0840386	0.000242708	0.000893457
cg17971251	1	177907297	SEC16B	-0.087009	0.000229371	0.00087303
cg18151262	19	1254251	MIDN	-0.0509844	5.92647e-06	5.93856e-05
cg18307978	7	30953124	AQP1	-0.067507	5.55589e-06	5.68322e-05
cg18337287	19	930871	ARID3A	-0.0983749	0.000152668	0.000629917
cg18368116	14	21436271	NA	-0.0970972	0.000165756	0.000661677
cg18421167	17	56276490	EPX	-0.0882366	0.000318773	0.00108693
cg18550847	14	100610570	EVL	-0.113715	6.80192e-06	6.3014e-05
cg18593727	3	121380792	HCLS1	-0.0662584	0.00192489	0.00447924
cg18666454	7	150651937	KCNH2;KCNH2;KCNH2	-0.106721	2.21061e-05	0.000130772
cg19097880	11	128160637	NA	-0.0498452	0.0046393	0.00902538
cg19232164	11	114320724	REXO2	-0.0736202	0.00588649	0.0109067
cg19247032	21	43786727	TFF1	-0.105811	9.37744e-06	7.67387e-05
cg19253809	15	74689005	NA	-0.0529296	0.00257065	0.00549844
cg19434937	12	7104184	LPCAT3	-0.0963326	4.62621e-05	0.000231882
cg19448292	20	35504064	C20orf118	-0.0663723	0.00888051	0.0153533
cg19726536	5	179225537	MIR1229;MGAT4B;MGAT4B	-0.0275731	0.00108885	0.00277007
cg19764973	11	59525433	STX3	-0.0622112	0.0298803	0.0440578
cg19805160	1	159870731	CCDC19	-0.130791	1.42947e-07	4.67913e-06
cg19851574	6	167178233	RPS6KA2	-0.030755	0.00926538	0.0159625
cg19928703	13	30143971	SLC7A1	-0.066912	0.0291004	0.0431029
cg19993680	10	5576748	NA	-0.049621	0.016307	0.0265125
cg20226253	20	34022914	GDF5	-0.0759797	0.00107261	0.00275734
cg20259557	8	145643626	SLC39A4	-0.0737696	6.09301e-05	0.000290453
cg20263733	3	130616293	ATP2C1;ATP2C1;ATP2C1;ATP2C1	-0.116146	1.86334e-05	0.000120382
cg20290167	17	81040724	METRNL	-0.0954561	1.6338e-05	0.000108405
cg20315954	17	15137304	PMP22;PMP22;PMP22	-0.123863	1.68021e-07	5.15615e-06
cg20317437	1	24172120	FUCA1	-0.129613	1.31067e-06	2.14514e-05
cg20472746	13	42039334	C13orf15	0.0832478	0.00141124	0.00348201
cg20673965	19	44220148	IRGC	-0.0739206	0.000156602	0.000640762
cg20840540	6	42363749	TRERF1	-0.0877344	1.26463e-05	9.30296e-05
cg20885063	17	17939419	ATPAF2	-0.13693	1.8805e-06	2.5648e-05
cg20891917	7	112064031	IFRD1	-0.0601239	0.00337261	0.00692866
cg21067750	15	40641778	PHGR1	-0.0757768	0.00205791	0.00474383
cg21073459	19	54604098	OSCAR;OSCAR;OSCAR;OSCAR;OSCAR;OSCAR;OSCAR;OSCAR	-0.0422468	1.48846e-06	2.21465e-05
cg21220721	1	6341230	ACOT7;ACOT7;ACOT7;ACOT7	-0.074631	2.11185e-05	0.000129509
cg21239317	7	23640510	CCDC126	-0.0554075	0.00361269	0.00736029
cg21247590	2	198070356	NA	-0.0498994	0.0101689	0.0172993
cg21498475	12	113737469	SLC24A6	-0.0767462	1.15858e-06	2.06097e-05
cg21627181	6	25754190	SLC17A4	-0.0899239	3.0665e-05	0.000171097
cg21723861	17	39686628	NA	-0.129481	1.28569e-08	1.32873e-06
cg21727145	15	101458127	LRRK1	0.0657891	0.000460321	0.00143049
cg21932513	1	17751974	RCC2;RCC2	-0.0445861	0.0282919	0.0420949
cg22027879	19	49469965	FTL	-0.0946689	0.00013298	0.000572745
cg22312249	17	72779428	TMEM104	-0.10461	1.43643e-06	2.21465e-05
cg22483743	6	42387064	TRERF1	-0.0419655	0.0201602	0.031625
cg22532234	19	40229215	CLC	-0.0581237	0.00223882	0.00501307
cg22609785	10	80416672	NA	-0.0929891	8.97351e-05	0.000411775
cg22704057	2	74425085	MTHFD2;MTHFD2	-0.0539855	0.0273963	0.0410109
cg22805603	2	32490766	NLRC4;NLRC4	0.046737	0.000549528	0.0016293
cg22945457	1	225612608	LBR;LBR	-0.0804794	1.23324e-05	9.30296e-05
cg23072086	1	21606767	ECE1;ECE1;ECE1;ECE1	0.0594539	0.00085071	0.00235988
cg23090159	7	65419194	VKORC1L1	-0.085162	1.51753e-05	0.000103487
cg23196129	2	120937418	NA	-0.0744157	4.00755e-06	4.57606e-05
cg23288563	14	21491469	NDRG2;NDRG2;NDRG2;NDRG2;NDRG2;NDRG2;NDRG2;NDRG2	0.0414916	0.0225666	0.0344106
cg23299618	11	45102239	NA	0.0440531	0.00181806	0.00431241
cg23498922	20	47731131	STAU1;STAU1;STAU1;STAU1;STAU1	-0.063239	0.0010535	0.00272245
cg23516680	10	103923333	NOLC1	-0.0805608	0.000214204	0.000821673
cg23584308	14	105352991	KIAA0284;KIAA0284	-0.045996	0.0116346	0.0194969
cg23706836	8	6407997	ANGPT2;ANGPT2;ANGPT2;MCPH1	-0.124957	3.41833e-06	4.30359e-05
cg23791626	17	65542892	PITPNC1;PITPNC1	-0.0584622	0.00207297	0.00475621
cg23824902	1	9619882	SLC25A33	-0.0462063	0.0258409	0.0389199
cg23871276	7	1577697	MAFK	-0.0183033	0.00275777	0.00581145
cg23943829	5	132009111	IL4;IL4	-0.0548791	0.00546489	0.0101639
cg24368962	11	111570978	SIK2	-0.100777	0.000305878	0.00105136
cg24371033	2	241807924	AGXT	-0.0295979	0.0127004	0.0211386
cg24459209	11	57148215	PRG3	-0.106924	0.000110591	0.000498165
cg24491618	7	150649807	KCNH2;KCNH2;KCNH2	-0.0576613	0.0224019	0.0342659
cg24576940	7	150648283	KCNH2;KCNH2;KCNH2	-0.0584678	0.0219879	0.0337377
cg24627621	6	42109176	C6orf132	-0.0628895	0.0003474	0.00115252
cg24678767	15	74902976	CLK3	-0.0578015	2.1086e-05	0.000129509
cg24804436	6	42955017	PPP2R5D;PPP2R5D;PPP2R5D	-0.0655737	0.00699984	0.0125895
cg24830730	7	150653195	KCNH2;KCNH2;KCNH2	-0.0226241	0.0209443	0.0324406
cg24836822	7	150648840	KCNH2;KCNH2;KCNH2	-0.0511842	0.007267	0.0128812
cg25066772	14	93136682	RIN3	-0.0362346	0.0140443	0.02314
cg25087851	11	60623918	GPR44	-0.0807758	0.000101483	0.000461372
cg25173129	17	56269410	EPX	-0.0918856	8.96489e-06	7.51263e-05
cg25332499	11	64756382	BATF2	-0.0611101	0.000398171	0.00127779
cg25479097	13	113305704	C13orf35	-0.111678	0.000212667	0.000821673
cg25600606	11	33308345	HIPK3;HIPK3	0.061321	0.00014634	0.000608924
cg25668878	3	46256527	NA	-0.049006	0.0129708	0.0215158
cg25689499	17	81042554	METRNL	-0.0528237	0.00992788	0.0169846
cg25854298	10	73936754	ASCC1	-0.137076	4.47754e-06	4.8855e-05
cg25888881	10	31288287	ZNF438;ZNF438;ZNF438;ZNF438;ZNF438;ZNF438;ZNF438;ZNF438;ZNF438	0.04423	0.00313456	0.00646667
cg25939647	15	40173065	GPR176	-0.111475	8.35627e-06	7.32666e-05
cg26102082	17	47590272	NGFR	-0.0451188	0.00662211	0.0121323
cg26103369	14	75153307	KIAA0317	-0.13364	2.88935e-05	0.000163066
cg26118698	21	47599972	C21orf56;C21orf56	-0.0747081	7.24032e-05	0.000338571
cg26252077	1	61607055	NFIA;NFIA;NFIA;NFIA	-0.0909546	9.0274e-06	7.51263e-05
cg26385286	6	10527815	GCNT2	-0.073235	0.0203984	0.0317956
cg26396815	4	102878132	BANK1;BANK1;BANK1	-0.115655	3.15714e-05	0.000174175
cg26423824	17	25898825	KSR1	-0.0585592	0.00709601	0.0127158
cg26457013	19	55740188	TMEM86B;TMEM86B	-0.0770023	1.27996e-05	9.30296e-05
cg26516974	6	52475065	NA	-0.0709579	5.97353e-05	0.00028767
cg26547058	8	142243143	NA	-0.0163534	0.0272001	0.0408418
cg26572165	1	160807694	CD244;CD244;CD244	0.0413514	0.0183458	0.0291515
cg26789365	10	133743048	NA	-0.073811	0.000183398	0.000726197
cg26791242	1	87596895	LOC339524;LOC339524;LOC339524;LOC339524;LOC339524	-0.0645879	0.000494633	0.00150848
cg26860613	12	6661647	IFFO1;IFFO1	-0.107797	5.97604e-05	0.00028767
cg26873132	11	9191490	DENND5A	-0.0412998	0.000264763	0.000948896
cg26922697	6	33284542	ZBTB22;ZBTB22	-0.0333073	0.0291449	0.0431029
cg27014783	2	2712909	NA	-0.0542442	0.00150633	0.00366143
cg27469152	17	56282313	EPX	-0.11089	2.21216e-08	1.49333e-06

## Sheet: SuppTableS6 Eos
Supplementary Table S6: Effect sizes, p-values and FDR-adjusted q-values for 431 CpGs significant in
comparison of eosinophil count with methyation from model with six cell types (no
specific adjustment for eosinophil fraction) from discovery data set.
CpG	CHR	Pos	Gene	Diff-EOS	Pval-EOS	Qval-EOS
cg00024471	3	188692547	NA	-0.335774	7.78478e-12	1.69881e-11
cg00100703	17	33514885	UNC45B;UNC45B	-0.364976	2.13922e-08	3.31343e-08
cg00170714	17	40724562	MLX;MLX;PSMC3IP;PSMC3IP;MLX	-0.45821	1.54444e-15	5.05547e-15
cg00286717	11	6225537	C11orf42	-0.407475	1.10759e-08	1.75996e-08
cg00324520	15	41411926	NA	-0.218154	9.41202e-06	1.25579e-05
cg00340958	20	48328658	B4GALT5	0.286095	4.4432e-09	7.27204e-09
cg00366037	10	76781121	MYST4	-0.510278	5.89381e-14	1.62576e-13
cg00381391	3	33837694	NA	-0.703521	3.9367e-28	7.15897e-27
cg00582671	1	872235	SAMD11	-0.523848	2.5706e-20	1.34273e-19
cg00637085	5	126952391	NA	-0.360383	8.14759e-07	1.13008e-06
cg00638845	6	137544615	NA	-0.552709	2.51743e-12	5.85809e-12
cg00711896	16	30410051	ZNF48	-0.224004	1.33984e-10	2.61951e-10
cg00736681	8	134546052	ST3GAL1;ST3GAL1	-0.739432	4.56089e-28	7.99784e-27
cg00793181	12	52995634	KRT72;KRT72;KRT72	-0.248751	9.51699e-09	1.51716e-08
cg00837308	16	88473488	NA	-0.311736	2.69863e-08	4.10225e-08
cg00851028	1	234905772	NA	-0.273607	6.86428e-14	1.88288e-13
cg00869582	16	12564745	SNX29	-0.469459	1.20428e-14	3.62762e-14
cg00944309	5	60142446	NA	-0.549457	1.29107e-25	1.59754e-24
cg00978785	17	71185631	NA	-0.228698	2.54415e-10	4.82308e-10
cg00986350	16	88540396	ZFPM1	-0.408774	2.95939e-12	6.85405e-12
cg01093786	11	96047698	MAML2	0.356706	1.87461e-09	3.16299e-09
cg01104306	11	4066205	STIM1	-0.389442	1.97121e-14	5.7956e-14
cg01126699	14	104625468	KIF26A	-0.052353	0.000919685	0.00113459
cg01258949	11	47092992	C11orf49;C11orf49;C11orf49;C11orf49	-0.567078	3.72627e-12	8.43134e-12
cg01304182	16	30409908	ZNF48	-0.137392	4.91505e-10	8.87239e-10
cg01310029	3	3152374	IL5RA;IL5RA;IL5RA;IL5RA;IL5RA;IL5RA	-0.457551	3.28314e-09	5.40946e-09
cg01376665	15	40641810	PHGR1	-0.318074	2.61796e-11	5.54059e-11
cg01378515	3	124773106	HEG1	-0.289567	1.44475e-10	2.78185e-10
cg01425762	16	81666633	CMIP;CMIP	-0.103545	0.00654854	0.0078232
cg01445399	1	87596934	LOC339524;LOC339524;LOC339524;LOC339524;LOC339524	-0.441414	9.43936e-16	3.21856e-15
cg01613077	20	4764277	RASSF2;RASSF2	-0.390064	7.74087e-07	1.0767e-06
cg01614759	10	45495435	C10orf25;ZNF22	-0.669837	1.54778e-23	1.31027e-22
cg01632240	8	42009223	AP3M2;AP3M2	0.283391	1.98531e-13	5.13046e-13
cg01649647	20	35177530	MYL9;MYL9	-0.352631	3.13023e-22	2.02229e-21
cg01770400	1	173886485	SERPINC1;SERPINC1	-0.383377	2.12991e-10	4.05343e-10
cg01888395	9	132145105	NA	-0.428136	1.84199e-14	5.4483e-14
cg01901579	14	95615731	DICER1	-0.75442	2.53149e-36	6.21481e-34
cg01942646	1	27240694	NR0B2	-0.539097	1.33706e-17	5.33736e-17
cg01998785	16	55542709	LPCAT2	-0.603108	3.88792e-39	1.90897e-36
cg02065192	1	6421414	ACOT7;ACOT7;ACOT7	-0.26273	4.39714e-10	7.99628e-10
cg02124524	16	85655007	KIAA0182;KIAA0182	-0.249149	7.98714e-14	2.16668e-13
cg02133716	8	128981622	PVT1	-0.602069	7.47053e-22	4.4766e-21
cg02195201	11	19135951	NA	-0.52655	2.88426e-11	6.07799e-11
cg02245534	17	81043668	METRNL	-0.457062	7.04086e-22	4.32133e-21
cg02402423	19	41255444	C19orf54;SNRPA	-0.475238	3.53275e-17	1.38766e-16
cg02427831	19	51961937	SIGLEC8	-0.441258	1.55897e-13	4.11534e-13
cg02464901	2	188851274	NA	-0.273543	5.96646e-07	8.37009e-07
cg02475695	16	616220	NHLRC4	-0.485658	1.80164e-18	7.69224e-18
cg02494549	2	161798364	NA	-0.757657	1.38854e-22	9.46906e-22
cg02593766	17	48608677	MYCBPAP;EPN3	0.300013	9.00459e-10	1.5734e-09
cg02596233	7	150970209	SMARCD3;SMARCD3	-0.365183	4.18622e-10	7.64103e-10
cg02752812	6	167101267	RPS6KA2	-0.335176	3.41431e-11	7.13373e-11
cg02757667	2	179149472	OSBPL6	-0.194013	0.000197383	0.000249861
cg02859042	12	124971861	NCOR2;NCOR2	-0.372068	6.62091e-09	1.06586e-08
cg02906503	17	76564972	DNAH17	-0.149958	0.000520743	0.000652257
cg02970679	17	56269818	EPX	-0.557153	6.65054e-18	2.74404e-17
cg02985445	7	97908505	NA	-0.460747	4.57133e-21	2.55059e-20
cg03106413	1	6683528	PHF13	-0.23657	5.93436e-06	8.00487e-06
cg03131767	12	123446272	ABCB9;ABCB9;ABCB9	-0.524461	8.83414e-24	8.03252e-23
cg03159676	16	85600536	NA	-0.172803	0.0139802	0.0164611
cg03231953	22	19716778	NA	-0.184873	0.000214078	0.000270212
cg03437605	8	22847209	RHOBTB2	-0.449384	5.14953e-16	1.81901e-15
cg03453890	8	145643535	SLC39A4	-0.290897	7.15704e-11	1.43433e-10
cg03479289	11	33563377	C11orf41	0.235339	2.51526e-08	3.83538e-08
cg03493123	5	177029444	B4GALT7	-0.361869	4.39773e-23	3.27165e-22
cg03507593	12	124939480	NCOR2;NCOR2	-0.141113	1.22686e-12	2.93848e-12
cg03538814	19	34667843	LSM14A;LSM14A	-0.103796	0.0236535	0.0273268
cg03651219	10	5576480	NA	-0.487977	5.6659e-15	1.77195e-14
cg03661164	7	148560646	EZH2;EZH2	-0.602513	8.83919e-22	5.22897e-21
cg03678274	1	236017128	LYST;MIR1537	0.296652	7.93136e-06	1.06112e-05
cg03693099	9	135936901	CEL	-0.344207	6.53169e-15	2.02979e-14
cg03695871	11	65547172	DKFZp761E198	-0.134734	5.78878e-11	1.18082e-10
cg03715305	19	5894715	NDUFA11	-0.194141	1.90007e-05	2.48783e-05
cg03761216	1	51986130	EPS15	-0.516949	6.28226e-16	2.20328e-15
cg03837680	17	77967529	TBC1D16	-0.0800468	0.0397668	0.0454081
cg03966055	22	40387288	NA	-0.167009	0.00274568	0.00333695
cg04066472	8	142157867	DENND3	-0.226694	1.58535e-08	2.47113e-08
cg04077085	4	9937674	SLC2A9;SLC2A9	-0.617479	8.69513e-19	3.9168e-18
cg04079215	1	95095221	NA	0.252664	5.79589e-11	1.18082e-10
cg04111761	3	46282766	CCR3;CCR3;CCR3;CCR3	-0.397908	2.85997e-10	5.33933e-10
cg04120520	16	85708039	KIAA0182;KIAA0182	-0.441768	1.22341e-10	2.40278e-10
cg04138746	16	17034451	NA	-0.644713	2.0711e-14	5.98182e-14
cg04217850	3	66428294	SLC25A26;SLC25A26;SLC25A26	-0.387233	2.41404e-14	6.85142e-14
cg04365699	3	177320997	NA	-0.367475	5.93379e-07	8.34811e-07
cg04385523	3	44381576	C3orf23;C3orf23;C3orf23	-0.461413	1.36171e-15	4.54829e-15
cg04497992	16	616212	NHLRC4	-0.245659	1.60678e-31	5.25952e-30
cg04741118	12	96720813	CDK17;CDK17	-0.366143	3.50835e-10	6.50038e-10
cg04766834	13	45912168	TPT1;SNORA31	-0.20837	0.00095886	0.00117995
cg04923746	1	211666304	RD3;RD3	-0.30671	5.33104e-07	7.52167e-07
cg04933530	14	77419754	NA	-0.466866	2.04963e-14	5.95483e-14
cg04983687	16	88558223	ZFPM1	-0.530083	1.29457e-34	1.05939e-32
cg05184016	7	149543136	ZNF862	-0.215144	1.62214e-29	3.79271e-28
cg05193538	1	26097991	MAN1C1	-0.0914115	0.0170188	0.0198485
cg05215575	16	4838722	SEPT12;SEPT12;LOC440335;LOC440335	-0.280893	2.50019e-08	3.82428e-08
cg05218678	6	46081541	NA	-0.315465	2.36235e-09	3.97231e-09
cg05219423	10	11291279	CUGBP2;CUGBP2;CUGBP2;CUGBP2	-0.532696	1.51471e-18	6.64037e-18
cg05300717	11	65546210	DKFZp761E198	-0.266451	1.18245e-21	6.83039e-21
cg05373256	11	61522178	C11orf9;DKFZP434K028;C11orf9	-0.367837	1.47271e-13	3.90866e-13
cg05480350	8	128972681	MIR1205;PVT1	-0.373933	1.07284e-13	2.86285e-13
cg05486260	8	139206451	FAM135B	-0.31125	3.55584e-07	5.09013e-07
cg05851148	5	179225977	MGAT4B;MIR1229;MGAT4B	-0.0756482	6.783e-07	9.48847e-07
cg05875421	14	91709951	GPR68	0.289961	6.23371e-06	8.38563e-06
cg06043201	8	28974428	KIF13B	0.257406	4.71701e-13	1.15803e-12
cg06070625	3	69812798	MITF;MITF	-0.602301	8.86044e-23	6.30504e-22
cg06266582	11	64871778	C11orf2	-0.412156	4.29335e-09	7.05028e-09
cg06391412	3	71295684	FOXP1;FOXP1	-0.698895	1.05837e-32	4.81466e-31
cg06398474	2	240291509	HDAC4	0.342661	4.22145e-13	1.04157e-12
cg06528816	2	47242277	TTC7A	-0.591242	1.9967e-23	1.66166e-22
cg06558622	7	149543177	ZNF862	-0.281571	1.37647e-25	1.6484e-24
cg06559756	17	65464297	PITPNC1;PITPNC1	-0.374167	2.35372e-14	6.71905e-14
cg06647928	5	73612203	NA	-0.305465	1.4324e-09	2.45055e-09
cg06648780	3	105133817	ALCAM	-0.488681	8.98342e-16	3.10624e-15
cg06680065	12	71835739	LGR5	-0.477663	2.68268e-10	5.05782e-10
cg06824199	1	47157809	KIAA0494	-0.500996	3.7383e-22	2.38377e-21
cg06864151	7	1913918	MAD1L1;MAD1L1;MAD1L1	-0.52088	6.28379e-11	1.27493e-10
cg06866208	16	67560245	NA	-0.406447	3.68453e-30	1.00506e-28
cg06958964	10	45494806	C10orf25;ZNF22	-0.523469	2.78693e-14	7.86426e-14
cg06996254	12	47427791	NA	-0.435749	9.96007e-13	2.39725e-12
cg07092805	13	21005388	CRYL1	0.213417	2.37856e-07	3.41484e-07
cg07177867	15	52030746	LYSMD2;LYSMD2	-0.491642	3.02048e-28	5.70406e-27
cg07209977	1	15224956	KIAA1026;KIAA1026	-0.182994	1.76992e-05	2.32361e-05
cg07313835	1	167342724	POU2F1	-0.306339	1.34123e-08	2.11072e-08
cg07386061	3	52492874	NISCH	-0.389235	9.10996e-12	1.9792e-11
cg07410597	3	66404129	SLC25A26;SLC25A26;SLC25A26	-0.601109	6.90502e-19	3.19846e-18
cg07456681	16	15146876	NTAN1	-0.165453	0.000376365	0.000473834
cg07584558	19	42703228	DEDD2	0.156481	0.00124741	0.00152737
cg07602847	11	65545237	DKFZp761E198;DKFZp761E198	-0.215815	1.96722e-06	2.69806e-06
cg07636225	11	63466987	RTN3;RTN3;RTN3;RTN3	-0.45606	3.84347e-16	1.37748e-15
cg07644446	3	64034134	NA	0.244749	1.99889e-06	2.73386e-06
cg07765167	17	36451845	MRPL45	-0.391848	1.75311e-15	5.66299e-15
cg07766916	16	88853845	NA	-0.470852	1.11299e-07	1.6216e-07
cg07819010	11	46619375	NA	-0.488532	2.67618e-20	1.38316e-19
cg07828169	5	132114623	2017-09-08	-0.432707	1.48657e-15	4.93179e-15
cg07895206	5	6492253	UBE2QL1	-0.389011	1.03851e-09	1.79546e-09
cg07908654	13	41631052	NA	-0.626551	6.47541e-26	8.59304e-25
cg07912766	18	45458698	SMAD2;SMAD2	-0.183813	0.000609597	0.000759676
cg07948085	10	9805340	NA	-0.429478	5.7587e-09	9.33176e-09
cg07970948	7	149543165	ZNF862	-0.181231	2.27985e-19	1.09746e-18
cg08067346	16	25011481	ARHGAP17;ARHGAP17	-0.737339	3.75061e-24	3.75826e-23
cg08077807	14	62001072	PRKCH	-0.624448	1.76509e-14	5.25248e-14
cg08085199	16	69170548	CIRH1A	-0.410238	2.3421e-18	9.91353e-18
cg08105265	17	56274480	EPX	-0.42136	5.39613e-09	8.77317e-09
cg08106792	1	153509323	S100A6	0.142986	1.08133e-07	1.58487e-07
cg08122652	3	122281939	PARP9;PARP9;DTX3L;PARP9;PARP9;PARP9;PARP9	-0.445238	1.66763e-07	2.40825e-07
cg08223760	1	43291209	ERMAP;ERMAP	-0.636416	6.76099e-13	1.65157e-12
cg08268892	6	157131429	ARID1B;ARID1B;ARID1B	-0.432765	8.86463e-15	2.68675e-14
cg08377000	4	90033921	TIGD2	-0.195362	0.0169018	0.019759
cg08404225	3	3151899	IL5RA;IL5RA;IL5RA;IL5RA;IL5RA;IL5RA;IL5RA;IL5RA;IL5RA;IL5RA;IL5RA;IL5RA	-0.434581	3.13077e-12	7.21695e-12
cg08473858	11	118476352	PHLDB1	-0.0664361	0.00634681	0.0076007
cg08698681	3	171091657	TNIK;TNIK;TNIK;TNIK;TNIK;TNIK;TNIK;TNIK;TNIK	-0.540134	1.40159e-27	2.21994e-26
cg08770358	13	48876684	RB1	-0.474617	2.47298e-09	4.14414e-09
cg08773180	11	57157607	PRG2	-0.559446	1.46339e-25	1.71077e-24
cg08832745	7	102531568	FBXL13;FBXL13	-0.220593	6.58277e-05	8.55064e-05
cg08884974	15	31505024	NA	-0.381455	3.23005e-12	7.37654e-12
cg08889930	3	127317798	MCM2	-0.348208	3.07379e-11	6.4497e-11
cg08924256	8	107672853	OXR1;OXR1	-0.298682	0.000114481	0.000146763
cg08940169	16	88540241	ZFPM1	-0.237724	4.49903e-34	2.76128e-32
cg08945642	5	205863	CCDC127	-0.451147	2.68857e-10	5.05782e-10
cg08969102	5	133563532	NA	-0.61711	6.91474e-22	4.29764e-21
cg09147843	16	53467612	RBL2	-0.535577	1.89169e-17	7.49047e-17
cg09187107	17	79006087	FLJ90757	0.117686	7.55667e-11	1.50826e-10
cg09227119	20	35504403	C20orf118	-0.381855	1.21397e-16	4.6206e-16
cg09241885	20	35504371	C20orf118	-0.477602	2.80408e-20	1.43417e-19
cg09249800	1	6341287	ACOT7;ACOT7;ACOT7;ACOT7	-0.430958	1.98715e-29	4.43496e-28
cg09332506	1	160309220	COPA;COPA	-0.585463	2.91477e-23	2.30831e-22
cg09377531	8	141046469	TRAPPC9;TRAPPC9	-0.865305	6.54901e-28	1.10882e-26
cg09423651	3	136618442	NCK1	-0.501608	5.14774e-12	1.14368e-11
cg09480190	16	85671771	KIAA0182;KIAA0182	-0.181592	1.72524e-13	4.48196e-13
cg09565310	5	112541553	MCC;MCC	-0.656548	4.51353e-26	6.33183e-25
cg09597192	6	32141591	AGPAT1;AGPAT1	-0.529625	2.38633e-22	1.56225e-21
cg09705784	17	76565232	DNAH17	-0.73265	5.24857e-36	8.59016e-34
cg09764807	10	43820676	NA	-0.441679	1.53715e-09	2.60255e-09
cg09793866	8	38009548	STAR;STAR	-0.263926	3.79816e-07	5.42121e-07
cg10036013	7	4778839	FOXK1	-0.234039	2.00411e-05	2.61707e-05
cg10065736	12	117440120	FBXW8;FBXW8	-0.427203	2.10558e-16	7.83212e-16
cg10101109	12	112455255	ERP29;ERP29	-0.402746	3.38807e-08	5.13439e-08
cg10142520	11	65344604	EHBP1L1	0.0759982	1.75694e-05	2.31276e-05
cg10159529	3	3152530	IL5RA;IL5RA;IL5RA;IL5RA;IL5RA;IL5RA	-0.583098	1.63019e-21	9.30725e-21
cg10298741	16	73019173	ZFHX3;ZFHX3	-0.430072	3.53297e-14	9.85617e-14
cg10298992	16	75103853	ZNRF1	-0.237858	1.88113e-12	4.4193e-12
cg10315334	17	34207332	CCL5;CCL5	0.156692	0.00137325	0.00167727
cg10402121	10	126487101	NA	-0.387173	4.17319e-12	9.39924e-12
cg10433549	17	41472748	NA	-0.393562	2.05467e-13	5.2819e-13
cg10454864	2	112654017	NA	-0.857086	9.52114e-22	5.56533e-21
cg10462803	16	85568220	NA	-0.414463	1.9589e-11	4.18183e-11
cg10619318	5	135470751	SMAD5;SMAD5;SMAD5OS;SMAD5	-0.244771	1.2624e-08	1.99948e-08
cg10704177	1	62209607	INADL	-0.700584	1.15863e-31	4.06347e-30
cg10977795	6	158507753	SYNJ2	0.282854	5.47639e-08	8.19788e-08
cg11137709	14	21508979	RNASE7	-0.516352	2.64796e-13	6.73652e-13
cg11142013	13	24441476	MIPEP	-0.249292	8.37658e-10	1.47946e-09
cg11202380	1	33473905	AK2	-0.321086	2.27876e-08	3.50744e-08
cg11385906	8	28745680	INTS9;INTS9;INTS9	-0.397688	3.3339e-19	1.57398e-18
cg11398517	20	42355625	GTSF1L;GTSF1L;GTSF1L;GTSF1L	-0.271072	7.02155e-10	1.24461e-09
cg11432630	7	100224149	TFR2	0.37418	1.239e-12	2.95316e-12
cg11456013	6	111192760	NA	-0.546838	1.68984e-24	1.80372e-23
cg11525409	2	74236068	NA	0.251353	7.78775e-08	1.15522e-07
cg11668148	15	72636405	HEXA	-0.524495	8.84342e-11	1.75794e-10
cg11683482	1	44678623	DMAP1;DMAP1;DMAP1	-0.348862	1.08247e-17	4.39249e-17
cg11699125	1	6341327	ACOT7;ACOT7;ACOT7;ACOT7	-0.404511	9.89197e-24	8.83083e-23
cg11770323	13	80066032	NDFIP2;NDFIP2	-0.554386	2.93558e-27	4.36779e-26
cg11791710	10	129172535	DOCK1	-0.392543	1.03012e-09	1.7926e-09
cg11830436	10	34943260	PARD3	-0.40837	1.69744e-13	4.43321e-13
cg11949606	21	34096277	SYNJ1;SYNJ1;SYNJ1;SYNJ1	-0.441688	4.79365e-15	1.50877e-14
cg11988722	20	33416959	NA	-0.393389	1.50966e-12	3.58088e-12
cg12043019	22	50356277	PIM3	0.443976	6.85294e-12	1.50888e-11
cg12074090	8	6360436	ANGPT2;ANGPT2;ANGPT2;MCPH1	-0.509861	6.90028e-17	2.68892e-16
cg12077754	2	75089669	HK2	-0.807673	2.28862e-22	1.51853e-21
cg12098228	7	2106321	MAD1L1;MAD1L1;MAD1L1	0.289903	1.20437e-06	1.66108e-06
cg12104982	19	5592815	SAFB2	-0.347884	1.21508e-22	8.52292e-22
cg12213680	6	24877462	FAM65B;FAM65B;FAM65B	-0.25222	2.09132e-15	6.71137e-15
cg12220466	12	48922312	NA	-0.343368	1.40794e-05	1.86334e-05
cg12298872	1	228352449	C1orf69	-0.181995	0.000125537	0.000160518
cg12402318	15	52135487	TMOD3	-0.47052	2.47449e-13	6.328e-13
cg12524168	5	76028910	F2R	0.1341	0.000840077	0.00104161
cg12580580	10	74544059	CCDC109A	-0.308524	0.000815619	0.00101385
cg12614529	4	154269418	MND1	-0.610486	2.03583e-30	5.87994e-29
cg12838007	14	70086897	KIAA0247	-0.280105	2.58233e-09	4.31267e-09
cg13007701	8	13078829	DLC1	0.176668	0.00285053	0.00345583
cg13054523	17	81055722	NA	-0.349845	1.63112e-34	1.14411e-32
cg13209388	1	6355060	ACOT7;ACOT7;ACOT7;ACOT7	-0.602398	3.59083e-15	1.13748e-14
cg13233042	11	63432489	ATL3	-0.597613	9.85227e-14	2.64342e-13
cg13423371	9	138701748	CAMSAP1	-0.467711	1.0507e-11	2.26269e-11
cg13424284	1	26624129	UBXN11;UBXN11;UBXN11	-0.181037	9.72535e-05	0.000125004
cg13429095	1	206913187	NA	-0.323652	7.72242e-15	2.38472e-14
cg13458609	9	130608923	ENG;ENG	-0.143241	2.05446e-08	3.19222e-08
cg13480658	1	4795012	AJAP1;AJAP1	-0.106376	1.3093e-09	2.25568e-09
cg13576859	9	97403129	FBP1;FBP1	-0.560817	9.04544e-31	2.77582e-29
cg13585029	9	95886330	NINJ1	-0.405782	8.55428e-15	2.60879e-14
cg13587621	9	95497984	BICD2;BICD2	-0.378188	3.18437e-09	5.26439e-09
cg13628444	9	134883788	MED27	-0.469934	4.90902e-26	6.69536e-25
cg13638867	11	2241568	NA	-0.293673	1.22289e-05	1.62281e-05
cg13645296	15	64275810	DAPK2	-0.476794	3.78959e-16	1.36815e-15
cg13710553	7	129598625	NA	-0.0705446	0.0214985	0.0249545
cg13753183	9	32989852	APTX;APTX;APTX;APTX;APTX;APTX;APTX	-0.397454	2.77995e-16	1.01108e-15
cg13792581	20	43590115	TOMM34	-0.571702	1.54609e-18	6.71797e-18
cg13821176	8	126448338	TRIB1	-0.235851	5.10032e-07	7.21688e-07
cg13835688	9	130859454	SLC25A25;SLC25A25;SLC25A25;SLC25A25	-0.748582	1.08043e-31	4.06347e-30
cg13850063	9	138362321	NA	-0.161996	3.07728e-10	5.72327e-10
cg13876325	17	16190098	PIGL	-0.304797	5.55889e-08	8.2961e-08
cg13953978	9	132600788	USP20;USP20;USP20	-0.482726	2.9536e-14	8.28696e-14
cg13968233	1	197564458	DENND1B;DENND1B	-0.605148	1.14588e-18	5.11481e-18
cg14011077	9	138362327	NA	-0.17581	8.12478e-21	4.38381e-20
cg14025883	9	5436224	C9orf46	-0.420919	4.67581e-12	1.04832e-11
cg14084609	14	100610407	EVL	-0.759373	6.76358e-26	8.73926e-25
cg14109551	6	118903047	C6orf204;C6orf204	-0.360033	6.40501e-11	1.29418e-10
cg14206516	1	175099472	TNN	-0.551601	1.26587e-16	4.78111e-16
cg14226212	9	113530240	MUSK;MUSK;MUSK	-0.457493	8.44578e-15	2.5918e-14
cg14355482	21	22373039	NCAM2	-0.435885	5.00186e-11	1.0319e-10
cg14480531	17	55700565	MSI2;MSI2	-0.499307	4.10678e-13	1.0184e-12
cg14588003	15	93361889	NA	-0.357688	6.97606e-08	1.03795e-07
cg14611258	17	17946468	C17orf39	-0.503382	3.88227e-14	1.07695e-13
cg14613878	20	35504198	C20orf118	-0.693659	1.22864e-34	1.05939e-32
cg14634136	2	127410953	NA	-0.190346	0.00353335	0.00426259
cg14684068	11	63894400	MACROD1	-0.0887278	0.0225093	0.0260662
cg14769121	7	98722470	SMURF1;SMURF1	-0.689497	2.9218e-29	5.97752e-28
cg14890343	17	78161178	CARD14;CARD14	-0.173147	0.00765991	0.00912868
cg15044010	7	104897205	SRPK2;SRPK2	-0.28213	0.00211273	0.00257407
cg15075897	12	7862691	DPPA3	-0.512793	4.89333e-12	1.0921e-11
cg15215978	6	167135152	RPS6KA2	-0.434638	1.14269e-10	2.25325e-10
cg15227982	10	104535854	C10orf26;C10orf26	-0.0690282	0.037815	0.0432801
cg15344640	5	176774729	LMAN2	-0.502906	2.23144e-15	7.11453e-15
cg15384400	4	36257279	NA	0.503788	3.72114e-13	9.32183e-13
cg15482717	11	70053254	FADD	-0.433866	6.10559e-18	2.54055e-17
cg15491950	3	132004600	NA	-0.422481	1.49825e-15	4.93718e-15
cg15526939	5	82805379	VCAN;VCAN;VCAN;VCAN	-0.352458	1.62781e-07	2.35769e-07
cg15700636	11	57156050	PRG2	-0.60688	8.96069e-25	9.7771e-24
cg15867698	14	69438267	ACTN1;ACTN1;ACTN1	-0.431197	1.33764e-22	9.25046e-22
cg15915361	12	46855182	NA	-0.414886	5.09954e-08	7.6571e-08
cg15937266	1	3777197	DFFB	-0.314447	5.49093e-10	9.80381e-10
cg15998761	2	191300784	MFSD6	-0.484506	4.02779e-13	1.00388e-12
cg16050349	3	138478129	PIK3CB	-0.354553	4.77688e-09	7.79218e-09
cg16177693	1	27240669	NR0B2	-0.436374	1.42774e-16	5.35132e-16
cg16225800	8	126591906	NA	-0.287672	2.28283e-12	5.33746e-12
cg16263722	1	29523841	MECR;MECR	-0.52121	3.25042e-23	2.53327e-22
cg16286925	5	108339964	FER	-0.323761	8.52942e-10	1.50106e-09
cg16335893	12	123634159	NA	-0.522388	1.2771e-23	1.11974e-22
cg16362140	5	10708717	DAP	-0.720177	3.2793e-32	1.34178e-30
cg16386158	2	102927397	IL1RL1	-0.495109	1.36315e-09	2.34024e-09
cg16409452	14	100610186	EVL	-0.715199	7.60574e-19	3.49011e-18
cg16458752	6	33255241	WDR46;WDR46	-0.236249	1.45377e-07	2.11184e-07
cg16576811	18	55888640	NEDD4L;NEDD4L;NEDD4L;NEDD4L;NEDD4L;NEDD4L;NEDD4L;NEDD4L;NEDD4L	-0.297371	5.04612e-10	9.07563e-10
cg16604391	12	125359749	NA	-0.40798	9.3182e-08	1.36983e-07
cg16618493	1	154978980	ZBTB7B	0.117367	0.000170836	0.000217871
cg16643422	8	13111435	DLC1	-0.329319	4.79612e-07	6.80606e-07
cg16809457	6	90399677	MDN1	-0.135015	0.01073	0.012695
cg16812352	16	4049855	ADCY9	-0.493824	1.57799e-13	4.14329e-13
cg17110052	19	51858208	ETFB;ETFB	-0.31795	5.42985e-12	1.20093e-11
cg17266278	4	3526751	LRPAP1	-0.106682	5.11231e-10	9.16111e-10
cg17374802	17	56270828	EPX	-0.57137	4.16044e-23	3.14274e-22
cg17413460	12	96367302	HAL	-0.457475	2.33904e-11	4.97173e-11
cg17417004	1	54819992	SSBP3;SSBP3;SSBP3	-0.129374	0.0192145	0.0223562
cg17493193	1	26440896	PDIK1L;PDIK1L;PDIK1L	-0.257827	2.17125e-06	2.96134e-06
cg17519037	17	36452075	MRPL45	-0.414784	3.18382e-12	7.30492e-12
cg17738684	2	102927278	IL1RL1	-0.508302	7.95319e-08	1.17621e-07
cg17738841	2	31094363	NA	-0.397003	9.2138e-09	1.47361e-08
cg17784922	7	142659425	KEL;KEL	-0.387981	1.47859e-08	2.31945e-08
cg17851165	5	1548899	NA	-0.41568	1.34443e-10	2.61951e-10
cg17940256	2	65179622	NA	-0.477483	2.25144e-16	8.24966e-16
cg17971251	1	177907297	SEC16B	-0.563616	1.79033e-20	9.55494e-20
cg18011672	2	190522601	NA	-0.265773	6.58546e-06	8.83459e-06
cg18151262	19	1254251	MIDN	-0.217296	8.89934e-14	2.40086e-13
cg18196453	6	125334555	RNF217	0.109701	0.0247424	0.0285176
cg18307978	7	30953124	AQP1	-0.384954	1.3703e-23	1.18038e-22
cg18337287	19	930871	ARID3A	-0.671846	8.00314e-25	8.93078e-24
cg18368116	14	21436271	NA	-0.656329	1.30146e-25	1.59754e-24
cg18421167	17	56276490	EPX	-0.499581	1.24193e-15	4.20545e-15
cg18550847	14	100610570	EVL	-0.712439	4.97512e-30	1.28567e-28
cg18593727	3	121380792	HCLS1	-0.455342	1.15121e-16	4.41597e-16
cg18666454	7	150651937	KCNH2;KCNH2;KCNH2	-0.599536	2.82675e-19	1.34751e-18
cg19097880	11	128160637	NA	-0.250508	8.74779e-08	1.28984e-07
cg19232164	11	114320724	REXO2	-0.386675	4.28206e-08	6.4692e-08
cg19247032	21	43786727	TFF1	-0.376291	1.33701e-08	2.11072e-08
cg19266635	12	46776389	NA	-0.131132	8.18022e-05	0.00010542
cg19328051	18	12380944	NA	-0.309216	1.9037e-10	3.63703e-10
cg19334657	6	89849755	NA	-0.225283	0.00951209	0.0113086
cg19434937	12	7104184	LPCAT3	-0.590302	7.52388e-24	6.97024e-23
cg19448292	20	35504064	C20orf118	-0.57301	2.32149e-20	1.22564e-19
cg19564017	6	135721680	AHI1;AHI1;AHI1;AHI1	-0.448495	1.2466e-06	1.71451e-06
cg19726536	5	179225537	MIR1229;MGAT4B;MGAT4B	-0.155424	9.07282e-13	2.19446e-12
cg19764973	11	59525433	STX3	-0.54091	3.49996e-13	8.81273e-13
cg19805160	1	159870731	CCDC19	-0.686707	2.59806e-29	5.54629e-28
cg19851574	6	167178233	RPS6KA2	-0.181461	2.76931e-09	4.59369e-09
cg19861623	14	91099023	TTC7B	-0.443564	3.65275e-10	6.74248e-10
cg19911880	8	131353969	ASAP1	-0.203045	0.000539115	0.00067355
cg19928703	13	30143971	SLC7A1	-0.730222	3.52333e-23	2.70305e-22
cg19993680	10	5576748	NA	-0.337389	6.40609e-10	1.13963e-09
cg20226253	20	34022914	GDF5	-0.329892	2.07494e-07	2.98768e-07
cg20259557	8	145643626	SLC39A4	-0.347579	7.09321e-13	1.72414e-12
cg20263733	3	130616293	ATP2C1;ATP2C1;ATP2C1;ATP2C1	-0.699154	2.56826e-24	2.68301e-23
cg20290167	17	81040724	METRNL	-0.50662	3.56566e-21	2.01235e-20
cg20315954	17	15137304	PMP22;PMP22;PMP22	-0.623559	2.90622e-24	2.97282e-23
cg20317437	1	24172120	FUCA1	-0.616238	1.26462e-19	6.14779e-19
cg20472746	13	42039334	C13orf15	0.476022	9.28363e-12	2.00804e-11
cg20673965	19	44220148	IRGC	-0.451322	1.06359e-19	5.22221e-19
cg20840540	6	42363749	TRERF1	-0.446034	4.68414e-19	2.19039e-18
cg20885063	17	17939419	ATPAF2	-0.807308	9.24043e-33	4.81466e-31
cg20891917	7	112064031	IFRD1	-0.31628	6.29538e-09	1.01679e-08
cg21067750	15	40641778	PHGR1	-0.488388	1.72518e-15	5.60968e-15
cg21073459	19	54604098	OSCAR;OSCAR;OSCAR;OSCAR;OSCAR;OSCAR;OSCAR;OSCAR	-0.0729463	0.0030935	0.00374116
cg21141030	15	65576504	PARP16	-0.303001	3.19683e-06	4.32409e-06
cg21179618	9	139424642	NOTCH1	-0.103151	0.0280879	0.0322977
cg21220721	1	6341230	ACOT7;ACOT7;ACOT7;ACOT7	-0.500126	1.07864e-32	4.81466e-31
cg21239317	7	23640510	CCDC126	-0.331287	4.05305e-11	8.39682e-11
cg21247590	2	198070356	NA	-0.367122	2.86351e-13	7.24732e-13
cg21498475	12	113737469	SLC24A6	-0.437454	1.02181e-29	2.50854e-28
cg21627181	6	25754190	SLC17A4	-0.563723	1.32008e-26	1.90635e-25
cg21723861	17	39686628	NA	-0.579595	4.65634e-23	3.41233e-22
cg21727145	15	101458127	LRRK1	0.205961	8.02189e-05	0.000103651
cg21824343	17	1633714	WDR81;WDR81;WDR81;WDR81	-0.0954288	2.38065e-08	3.65281e-08
cg21932513	1	17751974	RCC2;RCC2	-0.358891	7.10965e-12	1.55841e-11
cg22027879	19	49469965	FTL	-0.545122	8.18781e-19	3.72242e-18
cg22312249	17	72779428	TMEM104	-0.514846	3.35539e-20	1.69845e-19
cg22483743	6	42387064	TRERF1	-0.324862	1.80319e-12	4.25657e-12
cg22532234	19	40229215	CLC	-0.322806	1.359e-10	2.62716e-10
cg22609785	10	80416672	NA	-0.422712	1.382e-11	2.96315e-11
cg22704057	2	74425085	MTHFD2;MTHFD2	-0.156854	0.0145916	0.0171399
cg22805603	2	32490766	NLRC4;NLRC4	0.31605	1.76992e-18	7.62307e-18
cg22930808	3	122281881	PARP9;PARP9;DTX3L;PARP9;PARP9;PARP9;PARP9	-0.324046	0.000983676	0.00120746
cg22945457	1	225612608	LBR;LBR	-0.376248	6.95591e-16	2.42224e-15
cg22996170	19	12895529	NA	-0.32654	7.34148e-07	1.02405e-06
cg23072086	1	21606767	ECE1;ECE1;ECE1;ECE1	0.233224	2.31343e-06	3.14652e-06
cg23090159	7	65419194	VKORC1L1	-0.423885	4.47493e-16	1.59217e-15
cg23160522	15	75015787	CYP1A1	-0.256981	3.85268e-10	7.05845e-10
cg23196129	2	120937418	NA	-0.436393	1.47652e-27	2.26553e-26
cg23205629	8	33421410	RNF122	-0.37938	5.52044e-11	1.13412e-10
cg23299618	11	45102239	NA	0.168147	9.61228e-06	1.27903e-05
cg23432896	3	186490915	NA	-0.120941	0.0106175	0.0125923
cg23441018	15	34657364	LPCAT4	0.107451	0.0138474	0.0163439
cg23498922	20	47731131	STAU1;STAU1;STAU1;STAU1;STAU1	-0.327875	1.00984e-10	1.99932e-10
cg23516680	10	103923333	NOLC1	-0.45377	1.32236e-15	4.44713e-15
cg23534301	17	28098852	SSH2	-0.300543	4.49887e-10	8.15108e-10
cg23584308	14	105352991	KIAA0284;KIAA0284	-0.34303	2.22633e-14	6.39257e-14
cg23706836	8	6407997	ANGPT2;ANGPT2;ANGPT2;MCPH1	-0.63906	7.37698e-21	4.02455e-20
cg23709430	17	3977501	ZZEF1	-0.189706	8.00922e-05	0.000103651
cg23791626	17	65542892	PITPNC1;PITPNC1	-0.405619	1.09957e-17	4.4253e-17
cg23824902	1	9619882	SLC25A33	-0.358706	3.86618e-11	8.04363e-11
cg23871276	7	1577697	MAFK	-0.097601	1.43888e-09	2.45308e-09
cg23933289	1	178998656	FAM20B	-0.278681	2.63601e-05	3.43311e-05
cg23943829	5	132009111	IL4;IL4	-0.35877	3.30168e-12	7.50521e-12
cg24058805	1	66777579	PDE4B;PDE4B;PDE4B	-0.0689735	1.03321e-09	1.7926e-09
cg24198439	14	23589255	CEBPE	-0.177473	0.000197446	0.000249861
cg24368962	11	111570978	SIK2	-0.740816	3.55528e-29	6.98258e-28
cg24371033	2	241807924	AGXT	-0.0861536	0.00621954	0.00746649
cg24376793	1	202545589	PPP1R12B;PPP1R12B;PPP1R12B;PPP1R12B	-0.665439	1.24503e-18	5.50729e-18
cg24459209	11	57148215	PRG3	-0.564369	2.00757e-14	5.86736e-14
cg24491618	7	150649807	KCNH2;KCNH2;KCNH2	-0.574447	5.04228e-22	3.17405e-21
cg24512544	8	141588943	EIF2C2;EIF2C2	-0.243174	8.82215e-09	1.41558e-08
cg24576940	7	150648283	KCNH2;KCNH2;KCNH2	-0.528435	7.75895e-18	3.17471e-17
cg24627621	6	42109176	C6orf132	-0.443424	6.38543e-23	4.61065e-22
cg24678767	15	74902976	CLK3	-0.294917	2.22003e-16	8.19576e-16
cg24804436	6	42955017	PPP2R5D;PPP2R5D;PPP2R5D	-0.221446	0.000452327	0.000568012
cg24830730	7	150653195	KCNH2;KCNH2;KCNH2	-0.0625878	0.015372	0.0180134
cg24836822	7	150648840	KCNH2;KCNH2;KCNH2	-0.461023	6.9113e-25	7.89174e-24
cg25087851	11	60623918	GPR44	-0.48448	4.75136e-20	2.38053e-19
cg25173129	17	56269410	EPX	-0.529555	2.60924e-23	2.10023e-22
cg25332499	11	64756382	BATF2	-0.393341	9.06837e-20	4.49754e-19
cg25479097	13	113305704	C13orf35	-0.619452	1.52347e-14	4.56113e-14
cg25600606	11	33308345	HIPK3;HIPK3	0.287039	1.35906e-10	2.62716e-10
cg25668878	3	46256527	NA	-0.30762	1.49798e-09	2.54501e-09
cg25689499	17	81042554	METRNL	-0.397071	7.45772e-14	2.0343e-13
cg25709050	17	29817279	RAB11FIP4	-0.308306	4.32653e-08	6.51634e-08
cg25854298	10	73936754	ASCC1	-0.820299	7.7127e-28	1.26231e-26
cg25888881	10	31288287	ZNF438;ZNF438;ZNF438;ZNF438;ZNF438;ZNF438;ZNF438;ZNF438;ZNF438	0.31838	5.77317e-18	2.42276e-17
cg25939647	15	40173065	GPR176	-0.641563	5.00599e-24	4.72681e-23
cg25948982	20	45179157	C20orf123	-0.14843	0.000182975	0.000232748
cg26023748	10	54515151	NA	-0.0909751	0.0341359	0.0391605
cg26102082	17	47590272	NGFR	-0.381242	6.40675e-21	3.53451e-20
cg26103369	14	75153307	KIAA0317	-0.779014	1.82855e-22	1.22988e-21
cg26109393	14	96741054	NA	-0.140824	1.1377e-06	1.57355e-06
cg26118698	21	47599972	C21orf56;C21orf56	-0.287875	1.52385e-08	2.38283e-08
cg26180383	8	129061048	MIR1207;PVT1	-0.103975	0.00396828	0.00477555
cg26252077	1	61607055	NFIA;NFIA;NFIA;NFIA	-0.434546	9.35107e-16	3.21075e-15
cg26385286	6	10527815	GCNT2	-0.417587	3.90958e-07	5.56406e-07
cg26396815	4	102878132	BANK1;BANK1;BANK1	-0.717407	4.55935e-24	4.38949e-23
cg26423824	17	25898825	KSR1	-0.516975	7.47619e-22	4.4766e-21
cg26457013	19	55740188	TMEM86B;TMEM86B	-0.427043	2.45268e-23	2.00711e-22
cg26508444	10	126330845	FAM53B	-0.22462	1.11126e-07	1.6216e-07
cg26516974	6	52475065	NA	-0.307856	1.53082e-10	2.93607e-10
cg26547058	8	142243143	NA	-0.10832	2.21051e-08	3.41308e-08
cg26572165	1	160807694	CD244;CD244;CD244	0.283773	8.8101e-10	1.54491e-09
cg26789365	10	133743048	NA	-0.3397	6.99874e-11	1.40835e-10
cg26791242	1	87596895	LOC339524;LOC339524;LOC339524;LOC339524;LOC339524	-0.398895	9.67698e-17	3.74126e-16
cg26803289	1	182760430	NPL	-0.28844	2.94679e-06	3.99689e-06
cg26860613	12	6661647	IFFO1;IFFO1	-0.66565	4.22492e-24	4.14887e-23
cg26872742	5	16792048	MYO10	-0.310052	0.000844493	0.00104445
cg26873132	11	9191490	DENND5A	-0.183543	3.80571e-10	6.99851e-10
cg26899718	16	68404797	SMPD3	-0.169667	1.60981e-05	2.12478e-05
cg26922697	6	33284542	ZBTB22;ZBTB22	-0.23576	2.65182e-09	4.41371e-09
cg27014783	2	2712909	NA	-0.276138	2.83204e-10	5.30737e-10
cg27469152	17	56282313	EPX	-0.616457	2.82798e-35	3.47135e-33
cg27545787	1	2316653	MORN1	-0.0693979	0.0419513	0.0477914

## Sheet: SuppTableS7 Easi
Supplementary Table S7: Effect sizes, p-values and FDR-adjusted q-values for 337 CpGs significant in
comparison of EASI with methyation from model with six cell types (no specific
adjustment for eosinophil fraction) from discovery data set.
CpG	CHR	Pos	Gene	Diff_EASI	pval_easi	qval_easi
cg00024471	3	188692547	NA	-0.17389	0.000234664	0.000748181
cg00100703	17	33514885	UNC45B;UNC45B	-0.229314	0.000269402	0.000821591
cg00170714	17	40724562	MLX;MLX;PSMC3IP;PSMC3IP;MLX	-0.207564	0.000178452	0.000600137
cg00340958	20	48328658	B4GALT5	0.168893	0.000114528	0.000414129
cg00366037	10	76781121	MYST4	-0.198264	0.00209913	0.00456051
cg00381391	3	33837694	NA	-0.35982	9.81918e-09	8.01557e-07
cg00582671	1	872235	SAMD11	-0.242318	5.68354e-06	3.57771e-05
cg00638845	6	137544615	NA	-0.271954	0.000403028	0.00113078
cg00711896	16	30410051	ZNF48	-0.0767749	0.0215042	0.0327906
cg00736681	8	134546052	ST3GAL1;ST3GAL1	-0.329116	1.23309e-06	1.25948e-05
cg00793181	12	52995634	KRT72;KRT72;KRT72	-0.10452	0.0104965	0.0182112
cg00837308	16	88473488	NA	-0.125565	0.0178035	0.0282898
cg00869582	16	12564745	SNX29	-0.148208	0.0104107	0.0181909
cg00944309	5	60142446	NA	-0.23386	5.43378e-06	3.51965e-05
cg00978785	17	71185631	NA	-0.125821	0.000242416	0.000762989
cg00986350	16	88540396	ZFPM1	-0.158981	0.00541519	0.0101872
cg01104306	11	4066205	STIM1	-0.114477	0.0211424	0.0323393
cg01258949	11	47092992	C11orf49;C11orf49;C11orf49;C11orf49	-0.268295	0.000791692	0.00199202
cg01310029	3	3152374	IL5RA;IL5RA;IL5RA;IL5RA;IL5RA;IL5RA	-0.191531	0.00723803	0.0132607
cg01376665	15	40641810	PHGR1	-0.159449	0.000343544	0.00101006
cg01378515	3	124773106	HEG1	-0.121667	0.00488618	0.009263
cg01445399	1	87596934	LOC339524;LOC339524;LOC339524;LOC339524;LOC339524	-0.18721	0.000391463	0.00110465
cg01614759	10	45495435	C10orf25;ZNF22	-0.306289	4.81508e-06	3.37744e-05
cg01632240	8	42009223	AP3M2;AP3M2	0.116062	0.0008265	0.00205673
cg01649647	20	35177530	MYL9;MYL9	-0.186938	6.7728e-08	2.41384e-06
cg01770400	1	173886485	SERPINC1;SERPINC1	-0.148442	0.00952998	0.0168317
cg01888395	9	132145105	NA	-0.165856	0.00241856	0.0051193
cg01901579	14	95615731	DICER1	-0.323306	6.88264e-08	2.41384e-06
cg01942646	1	27240694	NR0B2	-0.263196	5.28297e-06	3.50532e-05
cg01998785	16	55542709	LPCAT2	-0.261539	1.57653e-07	3.36555e-06
cg02065192	1	6421414	ACOT7;ACOT7;ACOT7	-0.157213	6.26436e-05	0.000260661
cg02133716	8	128981622	PVT1	-0.304571	3.97474e-07	5.87719e-06
cg02195201	11	19135951	NA	-0.249949	0.000644862	0.00165773
cg02245534	17	81043668	METRNL	-0.270904	2.3812e-09	2.33834e-07
cg02402423	19	41255444	C19orf54;SNRPA	-0.227089	1.7622e-05	8.92001e-05
cg02427831	19	51961937	SIGLEC8	-0.142878	0.01361	0.0225
cg02464901	2	188851274	NA	-0.199545	8.57276e-05	0.000334065
cg02475695	16	616220	NHLRC4	-0.254561	5.93805e-07	7.67258e-06
cg02494549	2	161798364	NA	-0.269867	0.000489147	0.00134928
cg02593766	17	48608677	MYCBPAP;EPN3	0.137014	0.00223279	0.00480141
cg02596233	7	150970209	SMARCD3;SMARCD3	-0.148087	0.00730075	0.0133259
cg02859042	12	124971861	NCOR2;NCOR2	-0.138501	0.0209197	0.0320987
cg02970679	17	56269818	EPX	-0.2723	6.10447e-06	3.79405e-05
cg02985445	7	97908505	NA	-0.156755	0.00111692	0.00262396
cg03106413	1	6683528	PHF13	-0.1389	0.0036813	0.00723006
cg03131767	12	123446272	ABCB9;ABCB9;ABCB9	-0.194574	0.000161569	0.000550907
cg03437605	8	22847209	RHOBTB2	-0.210292	9.34447e-05	0.00035607
cg03453890	8	145643535	SLC39A4	-0.162145	9.35501e-05	0.00035607
cg03493123	5	177029444	B4GALT7	-0.173791	1.66687e-06	1.57391e-05
cg03507593	12	124939480	NCOR2;NCOR2	-0.0623244	0.000640774	0.0016559
cg03651219	10	5576480	NA	-0.13563	0.0330963	0.048364
cg03661164	7	148560646	EZH2;EZH2	-0.307997	2.58695e-07	4.70441e-06
cg03693099	9	135936901	CEL	-0.159219	0.000109616	0.000402614
cg03695871	11	65547172	DKFZp761E198	-0.0468945	0.0143988	0.0234877
cg03715305	19	5894715	NDUFA11	-0.106913	0.0114404	0.0193644
cg03761216	1	51986130	EPS15	-0.239686	5.85869e-05	0.000245865
cg04077085	4	9937674	SLC2A9;SLC2A9	-0.248596	0.000354877	0.00103103
cg04111761	3	46282766	CCR3;CCR3;CCR3;CCR3	-0.198581	0.000892288	0.00215819
cg04138746	16	17034451	NA	-0.298105	0.000216847	0.000700472
cg04217850	3	66428294	SLC25A26;SLC25A26;SLC25A26	-0.148773	0.00201955	0.00444664
cg04385523	3	44381576	C3orf23;C3orf23;C3orf23	-0.22723	3.20768e-05	0.000147399
cg04497992	16	616212	NHLRC4	-0.116567	1.44914e-08	8.01557e-07
cg04741118	12	96720813	CDK17;CDK17	-0.195199	0.000288668	0.000869547
cg04856396	17	3589140	P2RX5;P2RX5	0.0898813	0.012807	0.0213161
cg04923746	1	211666304	RD3;RD3	-0.18865	0.000580972	0.00155878
cg04933530	14	77419754	NA	-0.265147	2.28135e-06	1.93128e-05
cg04983687	16	88558223	ZFPM1	-0.241489	8.41722e-08	2.75524e-06
cg05184016	7	149543136	ZNF862	-0.0867753	2.01389e-05	9.83281e-05
cg05215575	16	4838722	SEPT12;SEPT12;LOC440335;LOC440335	-0.206204	5.26709e-06	3.50532e-05
cg05218678	6	46081541	NA	-0.127395	0.0112833	0.0193035
cg05219423	10	11291279	CUGBP2;CUGBP2;CUGBP2;CUGBP2	-0.262564	4.93175e-06	3.41055e-05
cg05300717	11	65546210	DKFZp761E198	-0.0906823	0.000829394	0.00205673
cg05373256	11	61522178	C11orf9;DKFZP434K028;C11orf9	-0.137006	0.00469392	0.0090381
cg05480350	8	128972681	MIR1205;PVT1	-0.139533	0.00444195	0.0085866
cg05486260	8	139206451	FAM135B	-0.153385	0.00875175	0.0156829
cg05851148	5	179225977	MGAT4B;MIR1229;MGAT4B	-0.0355509	0.0135145	0.0224176
cg06043201	8	28974428	KIF13B	0.152929	1.82143e-06	1.59701e-05
cg06070625	3	69812798	MITF;MITF	-0.256688	1.21607e-05	6.70887e-05
cg06266582	11	64871778	C11orf2	-0.176338	0.00798114	0.0144603
cg06391412	3	71295684	FOXP1;FOXP1	-0.243537	4.79573e-05	0.000208547
cg06398474	2	240291509	HDAC4	0.135705	0.00237136	0.00506234
cg06528816	2	47242277	TTC7A	-0.260622	4.22396e-06	3.09547e-05
cg06558622	7	149543177	ZNF862	-0.103875	0.000207081	0.000682395
cg06559756	17	65464297	PITPNC1;PITPNC1	-0.108781	0.0190461	0.0298774
cg06647928	5	73612203	NA	-0.171529	0.000315826	0.000934161
cg06648780	3	105133817	ALCAM	-0.160941	0.00600544	0.0112117
cg06809298	6	75953853	COX7A2;COX7A2	-0.326835	0.0274206	0.0408342
cg06824199	1	47157809	KIAA0494	-0.215884	2.63296e-05	0.000125513
cg06864151	7	1913918	MAD1L1;MAD1L1;MAD1L1	-0.305565	3.8878e-05	0.000175129
cg06866208	16	67560245	NA	-0.17751	1.10558e-06	1.18009e-05
cg06996254	12	47427791	NA	-0.215391	0.000152255	0.000522779
cg07092805	13	21005388	CRYL1	0.126903	0.000612696	0.00160874
cg07177867	15	52030746	LYSMD2;LYSMD2	-0.263968	7.72595e-10	9.4836e-08
cg07209977	1	15224956	KIAA1026;KIAA1026	-0.118382	0.00281557	0.00576019
cg07313835	1	167342724	POU2F1	-0.154444	0.00241889	0.0051193
cg07376535	18	905450	ADCYAP1;ADCYAP1	-0.138381	0.00159115	0.00360026
cg07386061	3	52492874	NISCH	-0.204708	0.000109878	0.000402614
cg07410597	3	66404129	SLC25A26;SLC25A26;SLC25A26	-0.26712	1.93664e-05	9.60497e-05
cg07584558	19	42703228	DEDD2	0.113805	0.00753218	0.0136974
cg07602847	11	65545237	DKFZp761E198;DKFZp761E198	-0.094128	0.0263298	0.0396563
cg07636225	11	63466987	RTN3;RTN3;RTN3;RTN3	-0.17828	0.00094736	0.00228016
cg07765167	17	36451845	MRPL45	-0.162279	0.000629535	0.00163962
cg07766916	16	88853845	NA	-0.282563	0.000602878	0.00159147
cg07819010	11	46619375	NA	-0.261675	5.14387e-07	7.01566e-06
cg07828169	5	132114623	2017-09-08	-0.177301	0.000795184	0.00199202
cg07895206	5	6492253	UBE2QL1	-0.224811	9.54605e-05	0.000360547
cg07908654	13	41631052	NA	-0.230738	0.000114708	0.000414129
cg07948085	10	9805340	NA	-0.173406	0.0141413	0.0231445
cg07970948	7	149543165	ZNF862	-0.0658553	0.000857942	0.00209577
cg08067346	16	25011481	ARHGAP17;ARHGAP17	-0.283029	0.00016331	0.000553002
cg08077807	14	62001072	PRKCH	-0.247575	0.0011595	0.00268546
cg08085199	16	69170548	CIRH1A	-0.179471	7.94156e-05	0.000317017
cg08106792	1	153509323	S100A6	0.0640443	0.00919596	0.0163004
cg08122652	3	122281939	PARP9;PARP9;DTX3L;PARP9;PARP9;PARP9;PARP9	-0.283503	0.000377385	0.0010773
cg08223760	1	43291209	ERMAP;ERMAP	-0.27066	0.00157667	0.00360026
cg08268892	6	157131429	ARID1B;ARID1B;ARID1B	-0.181098	0.000466063	0.00129286
cg08404225	3	3151899	IL5RA;IL5RA;IL5RA;IL5RA;IL5RA;IL5RA;IL5RA;IL5RA;IL5RA;IL5RA;IL5RA;IL5RA	-0.262719	4.4865e-06	3.23952e-05
cg08473858	11	118476352	PHLDB1	-0.0585324	0.00904707	0.0160946
cg08698681	3	171091657	TNIK;TNIK;TNIK;TNIK;TNIK;TNIK;TNIK;TNIK;TNIK	-0.232997	1.7865e-06	1.59485e-05
cg08773180	11	57157607	PRG2	-0.247502	1.93586e-06	1.66756e-05
cg08884974	15	31505024	NA	-0.181018	0.00059019	0.00157491
cg08889930	3	127317798	MCM2	-0.170533	0.000515482	0.00141398
cg08940169	16	88540241	ZFPM1	-0.102911	3.45352e-07	5.29899e-06
cg08945642	5	205863	CCDC127	-0.163486	0.0159801	0.0257802
cg08969102	5	133563532	NA	-0.216361	0.000794838	0.00199202
cg09147843	16	53467612	RBL2	-0.218668	0.000380493	0.0010799
cg09187107	17	79006087	FLJ90757	0.0663716	3.2232e-05	0.000147399
cg09227119	20	35504403	C20orf118	-0.180112	3.24218e-05	0.000147399
cg09241885	20	35504371	C20orf118	-0.139942	0.00803326	0.0145012
cg09249800	1	6341287	ACOT7;ACOT7;ACOT7;ACOT7	-0.184578	7.51083e-07	8.94932e-06
cg09332506	1	160309220	COPA;COPA	-0.221344	0.00012727	0.000446355
cg09377531	8	141046469	TRAPPC9;TRAPPC9	-0.354188	7.35854e-06	4.40615e-05
cg09423651	3	136618442	NCK1	-0.302806	5.16684e-06	3.50532e-05
cg09480190	16	85671771	KIAA0182;KIAA0182	-0.078609	0.000967304	0.00230557
cg09565310	5	112541553	MCC;MCC	-0.299769	6.60807e-07	8.3194e-06
cg09597192	6	32141591	AGPAT1;AGPAT1	-0.209154	0.000104337	0.000391063
cg09705784	17	76565232	DNAH17	-0.317899	1.5186e-07	3.36555e-06
cg10065736	12	117440120	FBXW8;FBXW8	-0.211333	1.21312e-05	6.70887e-05
cg10101109	12	112455255	ERP29;ERP29	-0.244879	0.000184162	0.00061097
cg10159529	3	3152530	IL5RA;IL5RA;IL5RA;IL5RA;IL5RA;IL5RA	-0.280199	1.76023e-06	1.59485e-05
cg10298741	16	73019173	ZFHX3;ZFHX3	-0.207145	6.91815e-05	0.000280728
cg10298992	16	75103853	ZNRF1	-0.0974042	0.00250532	0.0052465
cg10402121	10	126487101	NA	-0.243339	3.2635e-06	2.50372e-05
cg10433549	17	41472748	NA	-0.120762	0.018995	0.0298774
cg10454864	2	112654017	NA	-0.4171	8.98502e-07	1.02596e-05
cg10704177	1	62209607	INADL	-0.241103	6.3275e-05	0.000261076
cg10977795	6	158507753	SYNJ2	0.109872	0.0217378	0.0330441
cg11137709	14	21508979	RNASE7	-0.2463	0.000250286	0.000777788
cg11142013	13	24441476	MIPEP	-0.0954015	0.0153296	0.0248411
cg11202380	1	33473905	AK2	-0.160176	0.0029083	0.0059252
cg11385906	8	28745680	INTS9;INTS9;INTS9	-0.155297	0.000248154	0.000776073
cg11398517	20	42355625	GTSF1L;GTSF1L;GTSF1L;GTSF1L	-0.152463	0.000216779	0.000700472
cg11432630	7	100224149	TFR2	0.160975	0.00111352	0.00262396
cg11456013	6	111192760	NA	-0.267661	1.16518e-07	3.17835e-06
cg11525409	2	74236068	NA	0.126988	0.00251105	0.0052465
cg11668148	15	72636405	HEXA	-0.235294	0.00265066	0.00546837
cg11683482	1	44678623	DMAP1;DMAP1;DMAP1	-0.198615	2.82572e-07	4.70671e-06
cg11699125	1	6341327	ACOT7;ACOT7;ACOT7;ACOT7	-0.202369	1.25803e-07	3.25102e-06
cg11770323	13	80066032	NDFIP2;NDFIP2	-0.325713	1.16833e-11	5.73651e-09
cg11791710	10	129172535	DOCK1	-0.176275	0.00323988	0.0065196
cg11830436	10	34943260	PARD3	-0.133466	0.0114767	0.0193644
cg11949606	21	34096277	SYNJ1;SYNJ1;SYNJ1;SYNJ1	-0.156482	0.00423015	0.00820951
cg11988722	20	33416959	NA	-0.233355	8.56913e-06	5.00886e-05
cg12043019	22	50356277	PIM3	0.147835	0.0166643	0.0267391
cg12074090	8	6360436	ANGPT2;ANGPT2;ANGPT2;MCPH1	-0.282502	4.35496e-07	6.10939e-06
cg12077754	2	75089669	HK2	-0.371298	3.18842e-06	2.50372e-05
cg12098228	7	2106321	MAD1L1;MAD1L1;MAD1L1	0.18081	0.00104022	0.00246738
cg12104982	19	5592815	SAFB2	-0.116378	0.00115067	0.00267762
cg12213680	6	24877462	FAM65B;FAM65B;FAM65B	-0.120825	6.7937e-05	0.000277975
cg12220466	12	48922312	NA	-0.261929	0.000422077	0.0011775
cg12380764	1	206971195	IL19	-0.0658753	0.0199468	0.0308956
cg12402318	15	52135487	TMOD3	-0.134629	0.0311791	0.0456984
cg12614529	4	154269418	MND1	-0.238774	1.25748e-05	6.86023e-05
cg13054523	17	81055722	NA	-0.146972	1.03077e-06	1.15025e-05
cg13209388	1	6355060	ACOT7;ACOT7;ACOT7;ACOT7	-0.32996	4.60307e-06	3.27552e-05
cg13233042	11	63432489	ATL3	-0.328287	1.39271e-05	7.36372e-05
cg13423371	9	138701748	CAMSAP1	-0.163331	0.0127925	0.0213161
cg13429095	1	206913187	NA	-0.105145	0.0114248	0.0193644
cg13458609	9	130608923	ENG;ENG	-0.0862609	0.000261086	0.000801207
cg13576859	9	97403129	FBP1;FBP1	-0.242697	1.25692e-06	1.25948e-05
cg13585029	9	95886330	NINJ1	-0.149777	0.00392824	0.00765383
cg13587621	9	95497984	BICD2;BICD2	-0.162985	0.00612109	0.0113413
cg13628444	9	134883788	MED27	-0.193939	9.53539e-06	5.50809e-05
cg13645296	15	64275810	DAPK2	-0.218679	5.50136e-05	0.000232859
cg13753183	9	32989852	APTX;APTX;APTX;APTX;APTX;APTX;APTX	-0.118361	0.0100123	0.0176202
cg13792581	20	43590115	TOMM34	-0.219845	0.000369334	0.0010664
cg13835688	9	130859454	SLC25A25;SLC25A25;SLC25A25;SLC25A25	-0.326423	3.39189e-07	5.29899e-06
cg13850063	9	138362321	NA	-0.05889	0.016988	0.0271697
cg13876325	17	16190098	PIGL	-0.121101	0.0220141	0.0333609
cg13953978	9	132600788	USP20;USP20;USP20	-0.199873	0.000842476	0.00206828
cg13968233	1	197564458	DENND1B;DENND1B	-0.271948	5.43386e-05	0.000232002
cg14011077	9	138362327	NA	-0.0562483	0.00333693	0.0066603
cg14025883	9	5436224	C9orf46	-0.283459	2.57662e-07	4.70441e-06
cg14084609	14	100610407	EVL	-0.326139	2.95096e-06	2.41487e-05
cg14206516	1	175099472	TNN	-0.284218	3.8902e-06	2.9386e-05
cg14226212	9	113530240	MUSK;MUSK;MUSK	-0.203937	0.00031263	0.00093031
cg14355482	21	22373039	NCAM2	-0.236929	0.000116525	0.000417618
cg14480531	17	55700565	MSI2;MSI2	-0.247667	0.000122551	0.000432898
cg14613878	20	35504198	C20orf118	-0.276065	3.23105e-06	2.50372e-05
cg14769121	7	98722470	SMURF1;SMURF1	-0.271598	5.61856e-06	3.57771e-05
cg15215978	6	167135152	RPS6KA2	-0.239443	0.000223018	0.000715699
cg15344640	5	176774729	LMAN2	-0.216337	0.000371394	0.0010664
cg15384400	4	36257279	NA	0.386594	2.32349e-10	4.05238e-08
cg15482717	11	70053254	FADD	-0.185839	0.000272923	0.000827191
cg15491950	3	132004600	NA	-0.158171	0.00255843	0.00530037
cg15700636	11	57156050	PRG2	-0.348264	2.476e-10	4.05238e-08
cg15867698	14	69438267	ACTN1;ACTN1;ACTN1	-0.154264	0.000518469	0.00141427
cg15915361	12	46855182	NA	-0.161386	0.0274446	0.0408342
cg15937266	1	3777197	DFFB	-0.10568	0.0305157	0.0448599
cg15998761	2	191300784	MFSD6	-0.182165	0.00353726	0.00700321
cg16050349	3	138478129	PIK3CB	-0.127102	0.0269947	0.0405333
cg16177693	1	27240669	NR0B2	-0.200622	4.28416e-05	0.00019123
cg16225800	8	126591906	NA	-0.115923	0.00269027	0.00552688
cg16263722	1	29523841	MECR;MECR	-0.223809	6.85297e-06	4.15409e-05
cg16286925	5	108339964	FER	-0.178975	0.000237355	0.000751879
cg16335893	12	123634159	NA	-0.26202	1.40738e-07	3.36088e-06
cg16362140	5	10708717	DAP	-0.296076	1.4589e-06	1.43263e-05
cg16386158	2	102927397	IL1RL1	-0.28111	0.000216613	0.000700472
cg16409452	14	100610186	EVL	-0.320721	2.4047e-05	0.000115756
cg16812352	16	4049855	ADCY9	-0.319828	2.22473e-07	4.36937e-06
cg17110052	19	51858208	ETFB;ETFB	-0.111825	0.0104872	0.0182112
cg17266278	4	3526751	LRPAP1	-0.0392992	0.0150806	0.0245185
cg17374802	17	56270828	EPX	-0.170198	0.0038165	0.00746574
cg17413460	12	96367302	HAL	-0.193303	0.00252911	0.00526183
cg17493193	1	26440896	PDIK1L;PDIK1L;PDIK1L	-0.130334	0.0114395	0.0193644
cg17519037	17	36452075	MRPL45	-0.163692	0.00360171	0.00710217
cg17738684	2	102927278	IL1RL1	-0.269293	0.00185298	0.00413552
cg17738841	2	31094363	NA	-0.306927	4.06975e-07	5.87719e-06
cg17784922	7	142659425	KEL;KEL	-0.251102	4.79956e-05	0.000208547
cg17851165	5	1548899	NA	-0.228872	0.000131126	0.000453824
cg17940256	2	65179622	NA	-0.158241	0.00557463	0.0104471
cg17971251	1	177907297	SEC16B	-0.249945	1.37371e-05	7.36372e-05
cg18151262	19	1254251	MIDN	-0.0884786	0.00168719	0.0037827
cg18307978	7	30953124	AQP1	-0.19311	1.00325e-07	3.03714e-06
cg18337287	19	930871	ARID3A	-0.319393	2.69078e-07	4.70671e-06
cg18368116	14	21436271	NA	-0.248821	0.000120632	0.000429206
cg18421167	17	56276490	EPX	-0.207704	0.000631136	0.00163962
cg18550847	14	100610570	EVL	-0.277549	9.91275e-06	5.65949e-05
cg18593727	3	121380792	HCLS1	-0.162426	0.00205283	0.00447974
cg18666454	7	150651937	KCNH2;KCNH2;KCNH2	-0.277875	6.85295e-06	4.15409e-05
cg19097880	11	128160637	NA	-0.204318	1.10228e-06	1.18009e-05
cg19232164	11	114320724	REXO2	-0.162256	0.0140591	0.0230871
cg19247032	21	43786727	TFF1	-0.186486	0.002191	0.00473912
cg19434937	12	7104184	LPCAT3	-0.198942	0.000702513	0.00179653
cg19448292	20	35504064	C20orf118	-0.214109	0.000540293	0.00146566
cg19564017	6	135721680	AHI1;AHI1;AHI1;AHI1	-0.195193	0.029683	0.0437668
cg19726536	5	179225537	MIR1229;MGAT4B;MGAT4B	-0.0835211	5.32212e-05	0.000229225
cg19764973	11	59525433	STX3	-0.164814	0.0197483	0.0307219
cg19805160	1	159870731	CCDC19	-0.346377	1.46925e-08	8.01557e-07
cg19861623	14	91099023	TTC7B	-0.14491	0.0334001	0.048663
cg19911880	8	131353969	ASAP1	-0.121919	0.025985	0.0392573
cg19928703	13	30143971	SLC7A1	-0.291943	8.02061e-05	0.00031759
cg19993680	10	5576748	NA	-0.134216	0.00836058	0.0150368
cg20226253	20	34022914	GDF5	-0.181442	0.00153971	0.0035327
cg20259557	8	145643626	SLC39A4	-0.191565	2.02263e-05	9.83281e-05
cg20263733	3	130616293	ATP2C1;ATP2C1;ATP2C1;ATP2C1	-0.336708	2.87579e-07	4.70671e-06
cg20290167	17	81040724	METRNL	-0.160439	0.00487506	0.009263
cg20315954	17	15137304	PMP22;PMP22;PMP22	-0.201576	0.000862552	0.0020966
cg20317437	1	24172120	FUCA1	-0.288351	1.62535e-05	8.31299e-05
cg20472746	13	42039334	C13orf15	0.278378	1.10786e-05	6.25243e-05
cg20673965	19	44220148	IRGC	-0.216782	5.44793e-06	3.51965e-05
cg20840540	6	42363749	TRERF1	-0.127031	0.0127261	0.0213161
cg20885063	17	17939419	ATPAF2	-0.326028	4.09669e-06	3.04769e-05
cg20891917	7	112064031	IFRD1	-0.147329	0.0033231	0.00665977
cg21067750	15	40641778	PHGR1	-0.224692	0.000180548	0.000603055
cg21220721	1	6341230	ACOT7;ACOT7;ACOT7;ACOT7	-0.177157	4.77151e-05	0.000208547
cg21247590	2	198070356	NA	-0.121703	0.011194	0.0192177
cg21498475	12	113737469	SLC24A6	-0.165761	2.70394e-05	0.000127657
cg21627181	6	25754190	SLC17A4	-0.274738	1.43744e-07	3.36088e-06
cg21723861	17	39686628	NA	-0.302887	1.05155e-07	3.03714e-06
cg21727145	15	101458127	LRRK1	0.120261	0.0102655	0.0180013
cg22027879	19	49469965	FTL	-0.200253	0.00113671	0.00265774
cg22312249	17	72779428	TMEM104	-0.16444	0.00299685	0.0060804
cg22483743	6	42387064	TRERF1	-0.113346	0.0107825	0.0185762
cg22532234	19	40229215	CLC	-0.145734	0.00186577	0.00414522
cg22609785	10	80416672	NA	-0.190596	0.00124282	0.00286491
cg22805603	2	32490766	NLRC4;NLRC4	0.120898	0.000291378	0.000872358
cg22930808	3	122281881	PARP9;PARP9;DTX3L;PARP9;PARP9;PARP9;PARP9	-0.229474	0.012195	0.020506
cg22945457	1	225612608	LBR;LBR	-0.182149	7.30305e-05	0.000293918
cg22996170	19	12895529	NA	-0.147286	0.0183721	0.029099
cg23072086	1	21606767	ECE1;ECE1;ECE1;ECE1	0.15174	0.000552992	0.00149186
cg23090159	7	65419194	VKORC1L1	-0.211314	1.40976e-05	7.36372e-05
cg23160522	15	75015787	CYP1A1	-0.109289	0.0070213	0.0129118
cg23196129	2	120937418	NA	-0.219945	1.77809e-08	8.73044e-07
cg23205629	8	33421410	RNF122	-0.120494	0.0272387	0.040775
cg23498922	20	47731131	STAU1;STAU1;STAU1;STAU1;STAU1	-0.113512	0.0174624	0.0278378
cg23516680	10	103923333	NOLC1	-0.235776	7.7882e-06	4.60724e-05
cg23534301	17	28098852	SSH2	-0.137005	0.00244863	0.00515998
cg23584308	14	105352991	KIAA0284;KIAA0284	-0.189397	1.45141e-05	7.50151e-05
cg23706836	8	6407997	ANGPT2;ANGPT2;ANGPT2;MCPH1	-0.287668	1.4071e-05	7.36372e-05
cg23791626	17	65542892	PITPNC1;PITPNC1	-0.12065	0.0106773	0.0184596
cg23871276	7	1577697	MAFK	-0.0463223	0.0020468	0.00447974
cg23933289	1	178998656	FAM20B	-0.143236	0.019292	0.0301668
cg23943829	5	132009111	IL4;IL4	-0.220975	2.494e-06	2.07552e-05
cg24198439	14	23589255	CEBPE	-0.12463	0.00477555	0.00915936
cg24368962	11	111570978	SIK2	-0.291952	1.89993e-05	9.51902e-05
cg24376793	1	202545589	PPP1R12B;PPP1R12B;PPP1R12B;PPP1R12B	-0.260929	0.000597664	0.00158623
cg24459209	11	57148215	PRG3	-0.329912	7.65522e-07	8.94932e-06
cg24491618	7	150649807	KCNH2;KCNH2;KCNH2	-0.206058	0.000841497	0.00206828
cg24576940	7	150648283	KCNH2;KCNH2;KCNH2	-0.137688	0.0288546	0.0426735
cg24627621	6	42109176	C6orf132	-0.169764	8.1512e-05	0.000320179
cg24678767	15	74902976	CLK3	-0.177389	6.80292e-08	2.41384e-06
cg24804436	6	42955017	PPP2R5D;PPP2R5D;PPP2R5D	-0.145702	0.0160142	0.0257802
cg24830730	7	150653195	KCNH2;KCNH2;KCNH2	-0.0622907	0.00897937	0.0160323
cg24836822	7	150648840	KCNH2;KCNH2;KCNH2	-0.181155	8.96948e-05	0.000346773
cg24958325	2	241498221	ANKMY1;ANKMY1;DUSP28	-0.103494	0.0136756	0.0225326
cg25087851	11	60623918	GPR44	-0.184905	0.000348548	0.00101867
cg25173129	17	56269410	EPX	-0.273293	6.33227e-08	2.41384e-06
cg25332499	11	64756382	BATF2	-0.156425	0.000258307	0.000797664
cg25479097	13	113305704	C13orf35	-0.285788	0.000107859	0.000401204
cg25600606	11	33308345	HIPK3;HIPK3	0.13473	0.000782769	0.0019914
cg25689499	17	81042554	METRNL	-0.119619	0.0188813	0.0298094
cg25709050	17	29817279	RAB11FIP4	-0.149476	0.00605494	0.0112613
cg25854298	10	73936754	ASCC1	-0.352826	1.77079e-06	1.59485e-05
cg25888881	10	31288287	ZNF438;ZNF438;ZNF438;ZNF438;ZNF438;ZNF438;ZNF438;ZNF438;ZNF438	0.109567	0.00314806	0.00636089
cg25939647	15	40173065	GPR176	-0.288268	3.01269e-06	2.42497e-05
cg26023748	10	54515151	NA	-0.0874937	0.0284797	0.0422463
cg26102082	17	47590272	NGFR	-0.12404	0.00223935	0.00480141
cg26103369	14	75153307	KIAA0317	-0.234977	0.00336473	0.00668859
cg26109393	14	96741054	NA	-0.0624688	0.0200928	0.0310238
cg26118698	21	47599972	C21orf56;C21orf56	-0.178019	0.000131248	0.000453824
cg26180383	8	129061048	MIR1207;PVT1	-0.0771458	0.0202752	0.0312073
cg26252077	1	61607055	NFIA;NFIA;NFIA;NFIA	-0.249913	5.64358e-07	7.48919e-06
cg26385286	6	10527815	GCNT2	-0.238561	0.00191636	0.00423844
cg26396815	4	102878132	BANK1;BANK1;BANK1	-0.323358	1.58847e-06	1.5293e-05
cg26423824	17	25898825	KSR1	-0.216843	3.11301e-05	0.00014557
cg26457013	19	55740188	TMEM86B;TMEM86B	-0.210126	1.17891e-06	1.23158e-05
cg26516974	6	52475065	NA	-0.139847	0.00159893	0.00360125
cg26572165	1	160807694	CD244;CD244;CD244	0.143317	0.000959571	0.00229829
cg26789365	10	133743048	NA	-0.138376	0.00483562	0.00923849
cg26791242	1	87596895	LOC339524;LOC339524;LOC339524;LOC339524;LOC339524	-0.220645	7.3846e-07	8.94932e-06
cg26860613	12	6661647	IFFO1;IFFO1	-0.333868	2.08679e-07	4.26923e-06
cg26873132	11	9191490	DENND5A	-0.0885798	0.00158857	0.00360026
cg26899718	16	68404797	SMPD3	-0.102895	0.00536149	0.010125
cg26922697	6	33284542	ZBTB22;ZBTB22	-0.102042	0.00689038	0.0127187
cg27014783	2	2712909	NA	-0.0994358	0.0197721	0.0307219
cg27469152	17	56282313	EPX	-0.280197	1.31925e-08	8.01557e-07

## Sheet: SuppTableS8 RL
Supplementary Table S8: Effect sizes, p-values and FDR-adjusted q-values for 276 CpGs significant in
comparison of RL with methyation from model with six cell types (no specific
adjustment for eosinophil fraction) from discovery data set.
CpG	CHR	Pos	Gene	Diff_RL	pval_rl	qval_rl
cg00024471	3	188692547		-0.0172856	0.000167384	0.00108139
cg00100703	17	33514885	UNC45B;UNC45B	-0.017206	0.00582419	0.0134257
cg00170714	17	40724562	MLX;MLX;PSMC3IP;PSMC3IP;MLX	-0.017063	0.00157864	0.00490579
cg00340958	20	48328658	B4GALT5	0.0122836	0.00438621	0.0105055
cg00366037	10	76781121	MYST4	-0.0209007	0.000730521	0.00283715
cg00381391	3	33837694		-0.0328476	5.16887e-08	8.45971e-06
cg00582671	1	872235	SAMD11	-0.0190244	0.000250214	0.00138039
cg00638845	6	137544615		-0.0257057	0.000623851	0.00250904
cg00736681	8	134546052	ST3GAL1;ST3GAL1	-0.0282537	1.77065e-05	0.000268991
cg00837308	16	88473488		-0.013558	0.00842139	0.0182862
cg00869582	16	12564745	SNX29	-0.0161568	0.00363548	0.00901502
cg00944309	5	60142446		-0.0211207	2.0036e-05	0.000282177
cg00978785	17	71185631		-0.00827969	0.015325	0.0290524
cg00986350	16	88540396	ZFPM1	-0.018281	0.000794038	0.00295358
cg01258949	11	47092992	C11orf49;C11orf49;C11orf49;C11orf49	-0.023369	0.00281524	0.00759495
cg01310029	3	3152374	IL5RA;IL5RA;IL5RA;IL5RA;IL5RA;IL5RA	-0.0172476	0.012568	0.0243909
cg01376665	15	40641810	PHGR1	-0.013898	0.00137736	0.00439144
cg01378515	3	124773106	HEG1	-0.0114347	0.00663374	0.01501
cg01445399	1	87596934	LOC339524;LOC339524;LOC339524;LOC339524;LOC339524	-0.0157662	0.00209632	0.00612674
cg01614759	10	45495435	C10orf25;ZNF22	-0.0224719	0.000617917	0.00250904
cg01632240	8	42009223	AP3M2;AP3M2	0.00947948	0.00477069	0.0111543
cg01649647	20	35177530	MYL9;MYL9	-0.0162366	1.73297e-06	8.50886e-05
cg01888395	9	132145105		-0.013801	0.00960587	0.0200701
cg01901579	14	95615731	DICER1	-0.0241089	3.95802e-05	0.000388677
cg01942646	1	27240694	NR0B2	-0.0233441	2.79242e-05	0.000311861
cg01998785	16	55542709	LPCAT2	-0.0197873	5.26981e-05	0.000453943
cg02065192	1	6421414	ACOT7;ACOT7;ACOT7	-0.0127698	0.000979493	0.00341086
cg02133716	8	128981622	PVT1	-0.0248774	2.21728e-05	0.000282177
cg02195201	11	19135951		-0.0195962	0.00587021	0.0134686
cg02245534	17	81043668	METRNL	-0.0237061	1.41529e-07	1.73727e-05
cg02402423	19	41255444	C19orf54;SNRPA	-0.0188029	0.000297731	0.00152277
cg02464901	2	188851274		-0.0121401	0.0172952	0.0325362
cg02475695	16	616220	NHLRC4	-0.0186874	0.00019568	0.00116995
cg02494549	2	161798364		-0.0220331	0.00335779	0.00849831
cg02593766	17	48608677	MYCBPAP;EPN3	0.0143871	0.00094331	0.00333212
cg02970679	17	56269818	EPX	-0.0237841	4.83708e-05	0.000424108
cg02985445	7	97908505		-0.0151691	0.00102328	0.00351349
cg03106413	1	6683528	PHF13	-0.0122338	0.0088407	0.0189554
cg03131767	12	123446272	ABCB9;ABCB9;ABCB9	-0.014462	0.00393263	0.00960657
cg03437605	8	22847209	RHOBTB2	-0.0140758	0.00845412	0.0182862
cg03453890	8	145643535	SLC39A4	-0.00926513	0.0264324	0.0470228
cg03493123	5	177029444	B4GALT7	-0.0138652	0.000104103	0.000751681
cg03661164	7	148560646	EZH2;EZH2	-0.0250982	1.80788e-05	0.000268991
cg03693099	9	135936901	CEL	-0.0162788	3.59697e-05	0.000375768
cg03761216	1	51986130	EPS15	-0.0244466	1.74352e-05	0.000268991
cg04077085	4	9937674	SLC2A9;SLC2A9	-0.023415	0.000516667	0.00214986
cg04111761	3	46282766	CCR3;CCR3;CCR3;CCR3	-0.0135795	0.0211169	0.0382598
cg04138746	16	17034451		-0.0260035	0.000860934	0.00317833
cg04365699	3	177320997		-0.016762	0.0123124	0.0241816
cg04385523	3	44381576	C3orf23;C3orf23;C3orf23	-0.0179528	0.000763802	0.00288482
cg04497992	16	616212	NHLRC4	-0.00815225	5.7123e-05	0.000475379
cg04741118	12	96720813	CDK17;CDK17	-0.0176984	0.000740853	0.00283715
cg04923746	1	211666304	RD3;RD3	-0.0152842	0.00476027	0.0111543
cg04933530	14	77419754		-0.019793	0.000376067	0.00179271
cg04983687	16	88558223	ZFPM1	-0.0194438	8.91363e-06	0.00021883
cg05184016	7	149543136	ZNF862	-0.00653744	0.000964027	0.00338098
cg05215575	16	4838722	SEPT12;SEPT12;LOC440335;LOC440335	-0.0186593	2.32051e-05	0.000282177
cg05219423	10	11291279	CUGBP2;CUGBP2;CUGBP2;CUGBP2	-0.0166169	0.00365375	0.00901502
cg05300717	11	65546210	DKFZp761E198	-0.00779375	0.00286937	0.00761546
cg05373256	11	61522178	C11orf9;DKFZP434K028;C11orf9	-0.0136898	0.0034744	0.00867003
cg05486260	8	139206451	FAM135B	-0.0148645	0.00916055	0.0194711
cg06043201	8	28974428	KIF13B	0.0105623	0.000912428	0.00329413
cg06070625	3	69812798	MITF;MITF	-0.0192554	0.000735017	0.00283715
cg06391412	3	71295684	FOXP1;FOXP1	-0.021877	0.000143618	0.000952925
cg06398474	2	240291509	HDAC4	0.0134152	0.00196819	0.00591618
cg06528816	2	47242277	TTC7A	-0.0234789	1.44987e-05	0.00026023
cg06558622	7	149543177	ZNF862	-0.00896225	0.000937366	0.00333212
cg06559756	17	65464297	PITPNC1;PITPNC1	-0.0113624	0.0109962	0.0222186
cg06647928	5	73612203		-0.0128122	0.00653105	0.014846
cg06824199	1	47157809	KIAA0494	-0.0176006	0.000453726	0.00193721
cg06864151	7	1913918	MAD1L1;MAD1L1;MAD1L1	-0.0284365	9.49797e-05	0.000696045
cg06866208	16	67560245		-0.0147673	3.5926e-05	0.000375768
cg06996254	12	47427791		-0.015818	0.00471438	0.0111287
cg07092805	13	21005388	CRYL1	0.0110775	0.00225829	0.00630011
cg07177867	15	52030746	LYSMD2;LYSMD2	-0.0196745	3.86684e-06	0.000152947
cg07209977	1	15224956	KIAA1026;KIAA1026	-0.010134	0.00902559	0.0192677
cg07313835	1	167342724	POU2F1	-0.0173387	0.000433853	0.00191912
cg07386061	3	52492874	NISCH	-0.0164578	0.00144718	0.00458429
cg07410597	3	66404129	SLC25A26;SLC25A26;SLC25A26	-0.0234906	9.29032e-05	0.000691143
cg07584558	19	42703228	DEDD2	0.0156479	0.000111919	0.000796409
cg07636225	11	63466987	RTN3;RTN3;RTN3;RTN3	-0.0155056	0.00304961	0.00800727
cg07765167	17	36451845	MRPL45	-0.0119136	0.0105216	0.0215254
cg07766916	16	88853845		-0.0210609	0.00947734	0.0198862
cg07819010	11	46619375		-0.0190011	0.000242047	0.00136603
cg07828169	5	132114623	2017-09-08	-0.0130123	0.0118047	0.0233714
cg07895206	5	6492253	UBE2QL1	-0.0140451	0.0139789	0.0267069
cg07908654	13	41631052		-0.0181124	0.0017715	0.00543631
cg07912766	18	45458698	SMAD2;SMAD2	-0.0114454	0.0189745	0.0350244
cg07970948	7	149543165	ZNF862	-0.00694872	0.000233595	0.00133367
cg08067346	16	25011481	ARHGAP17;ARHGAP17	-0.0217564	0.00279692	0.00758724
cg08077807	14	62001072	PRKCH	-0.0221726	0.00265168	0.0072736
cg08085199	16	69170548	CIRH1A	-0.0160187	0.000281205	0.00148464
cg08122652	3	122281939	PARP9;PARP9;DTX3L;PARP9;PARP9;PARP9;PARP9	-0.0325403	2.08609e-05	0.000282177
cg08223760	1	43291209	ERMAP;ERMAP	-0.026465	0.00146291	0.00460442
cg08268892	6	157131429	ARID1B;ARID1B;ARID1B	-0.0118506	0.0192016	0.0353108
cg08404225	3	3151899	IL5RA;IL5RA;IL5RA;IL5RA;IL5RA;IL5RA;IL5RA;IL5RA;IL5RA;IL5RA;IL5RA;IL5RA	-0.0191379	0.000734071	0.00283715
cg08698681	3	171091657	TNIK;TNIK;TNIK;TNIK;TNIK;TNIK;TNIK;TNIK;TNIK	-0.0163285	0.000628537	0.00250904
cg08773180	11	57157607	PRG2	-0.0217958	1.23347e-05	0.00026023
cg08884974	15	31505024		-0.0122273	0.0199128	0.0363464
cg08889930	3	127317798	MCM2	-0.0122771	0.0106822	0.0217633
cg08940169	16	88540241	ZFPM1	-0.00841568	1.70471e-05	0.000268991
cg08969102	5	133563532		-0.01909	0.00224706	0.00630011
cg09187107	17	79006087	FLJ90757	0.00629128	4.60686e-05	0.000418883
cg09227119	20	35504403	C20orf118	-0.0152787	0.000288257	0.00148983
cg09241885	20	35504371	C20orf118	-0.0168099	0.000885786	0.00322163
cg09249800	1	6341287	ACOT7;ACOT7;ACOT7;ACOT7	-0.0135986	0.000183537	0.00115302
cg09332506	1	160309220	COPA;COPA	-0.0183743	0.00103863	0.003517
cg09377531	8	141046469	TRAPPC9;TRAPPC9	-0.0279162	0.000247037	0.00137836
cg09423651	3	136618442	NCK1	-0.0196742	0.00315704	0.00816853
cg09565310	5	112541553	MCC;MCC	-0.0246096	2.79468e-05	0.000311861
cg09597192	6	32141591	AGPAT1;AGPAT1	-0.0136486	0.00982991	0.0203649
cg09705784	17	76565232	DNAH17	-0.0261509	8.90424e-06	0.00021883
cg10036013	7	4778839	FOXK1	-0.013443	0.00714902	0.0159553
cg10065736	12	117440120	FBXW8;FBXW8	-0.0186564	6.55882e-05	0.000527931
cg10101109	12	112455255	ERP29;ERP29	-0.0281362	6.57184e-06	0.000201673
cg10159529	3	3152530	IL5RA;IL5RA;IL5RA;IL5RA;IL5RA;IL5RA	-0.018478	0.00133044	0.00435499
cg10163122	6	34633133	C6orf106;C6orf106	-0.0244102	0.00503891	0.0116703
cg10298741	16	73019173	ZFHX3;ZFHX3	-0.01794	0.000398607	0.00184638
cg10402121	10	126487101		-0.0208586	4.57469e-05	0.000418883
cg10454864	2	112654017		-0.0335266	5.71107e-05	0.000475379
cg10704177	1	62209607	INADL	-0.0214314	0.000212708	0.0012287
cg10977795	6	158507753	SYNJ2	0.011084	0.0175805	0.0329467
cg11137709	14	21508979	RNASE7	-0.0255768	7.26645e-05	0.000566322
cg11385906	8	28745680	INTS9;INTS9;INTS9	-0.0146785	0.000336447	0.0016356
cg11398517	20	42355625	GTSF1L;GTSF1L;GTSF1L;GTSF1L	-0.00981146	0.016084	0.0303739
cg11432630	7	100224149	TFR2	0.0120385	0.0128898	0.0249169
cg11456013	6	111192760		-0.0221833	6.47172e-06	0.000201673
cg11525409	2	74236068		0.0110542	0.00682977	0.0153124
cg11668148	15	72636405	HEXA	-0.0181971	0.0180107	0.0336245
cg11683482	1	44678623	DMAP1;DMAP1;DMAP1	-0.0139516	0.000287661	0.00148983
cg11699125	1	6341327	ACOT7;ACOT7;ACOT7;ACOT7	-0.0134541	0.000387637	0.00182282
cg11770323	13	80066032	NDFIP2;NDFIP2	-0.0268552	1.46105e-08	3.58688e-06
cg11791710	10	129172535	DOCK1	-0.013836	0.0182929	0.034022
cg11830436	10	34943260	PARD3	-0.011823	0.0205771	0.0374198
cg11949606	21	34096277	SYNJ1;SYNJ1;SYNJ1;SYNJ1	-0.0161647	0.00219678	0.00619896
cg11988722	20	33416959		-0.0214275	2.35626e-05	0.000282177
cg12074090	8	6360436	ANGPT2;ANGPT2;ANGPT2;MCPH1	-0.0233494	2.14522e-05	0.000282177
cg12077754	2	75089669	HK2	-0.0335304	1.17083e-05	0.00026023
cg12098228	7	2106321	MAD1L1;MAD1L1;MAD1L1	0.0164565	0.00218405	0.00619865
cg12104982	19	5592815	SAFB2	-0.00990581	0.00426768	0.0102717
cg12213680	6	24877462	FAM65B;FAM65B;FAM65B	-0.00915972	0.00201733	0.00596691
cg12220466	12	48922312		-0.0291498	4.25145e-05	0.000406967
cg12380764	1	206971195	IL19	-0.00705007	0.0109019	0.0221191
cg12614529	4	154269418	MND1	-0.0191347	0.000329903	0.0016356
cg12838007	14	70086897	KIAA0247	-0.0144255	0.00087192	0.00319487
cg13054523	17	81055722		-0.0112797	0.000126047	0.000871676
cg13209388	1	6355060	ACOT7;ACOT7;ACOT7;ACOT7	-0.0287909	3.32336e-05	0.000362616
cg13233042	11	63432489	ATL3	-0.0282979	0.000118901	0.000834005
cg13576859	9	97403129	FBP1;FBP1	-0.022038	4.36101e-06	0.000152947
cg13585029	9	95886330	NINJ1	-0.0150105	0.00278142	0.00758711
cg13587621	9	95497984	BICD2;BICD2	-0.0143302	0.0133692	0.0257423
cg13628444	9	134883788	MED27	-0.0139865	0.00113091	0.00375186
cg13645296	15	64275810	DAPK2	-0.0168707	0.00136735	0.00438803
cg13753183	9	32989852	APTX;APTX;APTX;APTX;APTX;APTX;APTX	-0.0108452	0.0144255	0.0274531
cg13835688	9	130859454	SLC25A25;SLC25A25;SLC25A25;SLC25A25	-0.0284533	3.7826e-06	0.000152947
cg13953978	9	132600788	USP20;USP20;USP20	-0.019539	0.000736246	0.00283715
cg13968233	1	197564458	DENND1B;DENND1B	-0.0215297	0.00112648	0.00375186
cg14025883	9	5436224	C9orf46	-0.020892	0.00013937	0.000937404
cg14084609	14	100610407	EVL	-0.0239063	0.000449702	0.00193721
cg14109551	6	118903047	C6orf204;C6orf204	-0.0129415	0.0111593	0.0223641
cg14206516	1	175099472	TNN	-0.0258081	1.46452e-05	0.00026023
cg14226212	9	113530240	MUSK;MUSK;MUSK	-0.0160686	0.0034786	0.00867003
cg14355482	21	22373039	NCAM2	-0.0213523	0.000334197	0.0016356
cg14480531	17	55700565	MSI2;MSI2	-0.022366	0.00032601	0.00163338
cg14613878	20	35504198	C20orf118	-0.0251736	8.69578e-06	0.00021883
cg14769121	7	98722470	SMURF1;SMURF1	-0.0215624	0.00019301	0.00116995
cg15344640	5	176774729	LMAN2	-0.0180067	0.00232352	0.00644548
cg15384400	4	36257279		0.028427	4.21015e-06	0.000152947
cg15482717	11	70053254	FADD	-0.0144988	0.00371027	0.00910872
cg15491950	3	132004600		-0.0127939	0.0122124	0.0240816
cg15700636	11	57156050	PRG2	-0.0311299	4.44179e-09	2.18092e-06
cg15867698	14	69438267	ACTN1;ACTN1;ACTN1	-0.013347	0.00194018	0.00588041
cg15937266	1	3777197	DFFB	-0.0122367	0.00968657	0.020153
cg15998761	2	191300784	MFSD6	-0.0192671	0.00135771	0.00438576
cg16177693	1	27240669	NR0B2	-0.0157103	0.00101284	0.00350216
cg16263722	1	29523841	MECR;MECR	-0.0191588	6.90018e-05	0.00054645
cg16286925	5	108339964	FER	-0.0191862	4.31003e-05	0.000406967
cg16335893	12	123634159		-0.0209112	1.537e-05	0.00026023
cg16362140	5	10708717	DAP	-0.0251276	2.34449e-05	0.000282177
cg16386158	2	102927397	IL1RL1	-0.0194167	0.00990177	0.0204276
cg16409452	14	100610186	EVL	-0.0235543	0.00149067	0.00466189
cg16812352	16	4049855	ADCY9	-0.0217992	0.000449046	0.00193721
cg17374802	17	56270828	EPX	-0.0159663	0.00493774	0.0114902
cg17413460	12	96367302	HAL	-0.0157615	0.0117188	0.0232952
cg17738684	2	102927278	IL1RL1	-0.0224566	0.00814953	0.0178635
cg17738841	2	31094363		-0.0225427	0.000208599	0.00121931
cg17784922	7	142659425	KEL;KEL	-0.0160648	0.00944926	0.0198862
cg17851165	5	1548899		-0.0174426	0.00303447	0.00800727
cg17940256	2	65179622		-0.0136104	0.0137061	0.0262878
cg18151262	19	1254251	MIDN	-0.00818009	0.00284189	0.00761546
cg18307978	7	30953124	AQP1	-0.0151174	2.16955e-05	0.000282177
cg18337287	19	930871	ARID3A	-0.0221946	0.000311989	0.00157924
cg18368116	14	21436271		-0.0274284	7.52539e-06	0.000217351
cg18421167	17	56276490	EPX	-0.0137147	0.0216099	0.0388662
cg18550847	14	100610570	EVL	-0.0238054	8.06512e-05	0.000614581
cg18593727	3	121380792	HCLS1	-0.0169608	0.000793334	0.00295358
cg18666454	7	150651937	KCNH2;KCNH2;KCNH2	-0.0212352	0.000427877	0.00191912
cg19097880	11	128160637		-0.013495	0.00134521	0.00437415
cg19232164	11	114320724	REXO2	-0.0216367	0.000624973	0.00250904
cg19247032	21	43786727	TFF1	-0.016091	0.00680624	0.0153124
cg19253809	15	74689005		-0.0108492	0.0116535	0.0232596
cg19434937	12	7104184	LPCAT3	-0.0169047	0.00286137	0.00761546
cg19448292	20	35504064	C20orf118	-0.0170205	0.00466646	0.0110687
cg19726536	5	179225537	MIR1229;MGAT4B;MGAT4B	-0.00528612	0.0101982	0.020951
cg19805160	1	159870731	CCDC19	-0.0251319	3.72622e-05	0.000381161
cg19861623	14	91099023	TTC7B	-0.0170322	0.00942218	0.0198862
cg19928703	13	30143971	SLC7A1	-0.0198294	0.00628823	0.0143606
cg20226253	20	34022914	GDF5	-0.0180345	0.00113858	0.00375198
cg20259557	8	145643626	SLC39A4	-0.017774	4.70262e-05	0.000419816
cg20263733	3	130616293	ATP2C1;ATP2C1;ATP2C1;ATP2C1	-0.02644	3.93979e-05	0.000388677
cg20290167	17	81040724	METRNL	-0.0146008	0.00823141	0.0179628
cg20315954	17	15137304	PMP22;PMP22;PMP22	-0.0148964	0.0110644	0.0222648
cg20317437	1	24172120	FUCA1	-0.0249349	0.000128152	0.000873926
cg20472746	13	42039334	C13orf15	0.021936	0.000389808	0.00182282
cg20673965	19	44220148	IRGC	-0.0172934	0.000193681	0.00116995
cg20840540	6	42363749	TRERF1	-0.0122603	0.0125355	0.0243909
cg20885063	17	17939419	ATPAF2	-0.0258185	0.000185516	0.00115302
cg21067750	15	40641778	PHGR1	-0.0206119	0.000370494	0.00178346
cg21179618	9	139424642	NOTCH1	-0.0122634	0.00317758	0.00816853
cg21220721	1	6341230	ACOT7;ACOT7;ACOT7;ACOT7	-0.0137798	0.00103812	0.003517
cg21498475	12	113737469	SLC24A6	-0.0187387	4.19288e-07	3.45285e-05
cg21627181	6	25754190	SLC17A4	-0.0251965	4.21937e-07	3.45285e-05
cg21723861	17	39686628		-0.0270534	1.06465e-06	6.53428e-05
cg22027879	19	49469965	FTL	-0.0183255	0.00215678	0.00619286
cg22312249	17	72779428	TMEM104	-0.0184899	0.000485119	0.00203584
cg22483743	6	42387064	TRERF1	-0.0143041	0.000745403	0.00283715
cg22532234	19	40229215	CLC	-0.0122951	0.00740213	0.0164212
cg22609785	10	80416672		-0.0164595	0.00407936	0.00991567
cg22805603	2	32490766	NLRC4;NLRC4	0.0117348	0.000256081	0.00139458
cg22930808	3	122281881	PARP9;PARP9;DTX3L;PARP9;PARP9;PARP9;PARP9	-0.0238897	0.00742465	0.0164212
cg22945457	1	225612608	LBR;LBR	-0.0133653	0.00317353	0.00816853
cg23072086	1	21606767	ECE1;ECE1;ECE1;ECE1	0.0132858	0.00197608	0.00591618
cg23090159	7	65419194	VKORC1L1	-0.0232228	5.26399e-07	3.69231e-05
cg23196129	2	120937418		-0.0182765	1.69294e-06	8.50886e-05
cg23205629	8	33421410	RNF122	-0.0169575	0.00108572	0.00365129
cg23288563	14	21491469	NDRG2;NDRG2;NDRG2;NDRG2;NDRG2;NDRG2;NDRG2;NDRG2	0.0101573	0.0214725	0.038761
cg23498922	20	47731131	STAU1;STAU1;STAU1;STAU1;STAU1	-0.0121226	0.00853903	0.0183889
cg23516680	10	103923333	NOLC1	-0.0181951	0.000430723	0.00191912
cg23534301	17	28098852	SSH2	-0.0125496	0.00419042	0.0101355
cg23584308	14	105352991	KIAA0284;KIAA0284	-0.0132818	0.00217054	0.00619613
cg23706836	8	6407997	ANGPT2;ANGPT2;ANGPT2;MCPH1	-0.0244705	0.000147432	0.000965185
cg23871276	7	1577697	MAFK	-0.00540674	0.000182643	0.00115302
cg23943829	5	132009111	IL4;IL4	-0.0134223	0.00448249	0.010684
cg24198439	14	23589255	CEBPE	-0.0148979	0.000465674	0.00197108
cg24368962	11	111570978	SIK2	-0.0263719	6.15527e-05	0.000503706
cg24376793	1	202545589	PPP1R12B;PPP1R12B;PPP1R12B;PPP1R12B	-0.0267158	0.000258466	0.00139458
cg24459209	11	57148215	PRG3	-0.0229145	0.000522614	0.00215633
cg24491618	7	150649807	KCNH2;KCNH2;KCNH2	-0.0140587	0.0197904	0.0362577
cg24627621	6	42109176	C6orf132	-0.0128753	0.00208671	0.00612674
cg24678767	15	74902976	CLK3	-0.0137687	2.43224e-05	0.000284341
cg24836822	7	150648840	KCNH2;KCNH2;KCNH2	-0.0132406	0.00331535	0.0084344
cg24958325	2	241498221	ANKMY1;ANKMY1;DUSP28	-0.00940435	0.022763	0.0407907
cg25087851	11	60623918	GPR44	-0.0126213	0.0124333	0.0243217
cg25173129	17	56269410	EPX	-0.0182771	0.000264779	0.00141312
cg25332499	11	64756382	BATF2	-0.0126275	0.00244471	0.00674356
cg25479097	13	113305704	C13orf35	-0.0278298	8.136e-05	0.000614581
cg25600606	11	33308345	HIPK3;HIPK3	0.0119178	0.00214105	0.00618385
cg25689499	17	81042554	METRNL	-0.0149866	0.00201303	0.00596691
cg25709050	17	29817279	RAB11FIP4	-0.0173636	0.000937434	0.00333212
cg25854298	10	73936754	ASCC1	-0.0255204	0.000424112	0.00191912
cg25939647	15	40173065	GPR176	-0.0256704	1.49367e-05	0.00026023
cg26102082	17	47590272	NGFR	-0.0135732	0.000452413	0.00193721
cg26103369	14	75153307	KIAA0317	-0.0226108	0.00324654	0.00830236
cg26118698	21	47599972	C21orf56;C21orf56	-0.0143386	0.001847	0.00563279
cg26252077	1	61607055	NFIA;NFIA;NFIA;NFIA	-0.0134766	0.0074893	0.0164899
cg26396815	4	102878132	BANK1;BANK1;BANK1	-0.0245585	0.000197772	0.00116995
cg26423824	17	25898825	KSR1	-0.0160355	0.00172484	0.0053264
cg26457013	19	55740188	TMEM86B;TMEM86B	-0.0151249	0.000430125	0.00191912
cg26516974	6	52475065		-0.0126989	0.00316266	0.00816853
cg26572165	1	160807694	CD244;CD244;CD244	0.01291	0.0021197	0.00615843
cg26789365	10	133743048		-0.0112924	0.0189337	0.0350244
cg26791242	1	87596895	LOC339524;LOC339524;LOC339524;LOC339524;LOC339524	-0.0187719	1.52526e-05	0.00026023
cg26860613	12	6661647	IFFO1;IFFO1	-0.0272369	1.44571e-05	0.00026023
cg26873132	11	9191490	DENND5A	-0.0062347	0.0235246	0.0420021
cg26899718	16	68404797	SMPD3	-0.0105596	0.0033927	0.00854265
cg27469152	17	56282313	EPX	-0.0211045	1.22767e-05	0.00026023
