# Supplementary material for: Replicated methylation changes associated with eczema herpeticum and allergic response
Source: Clin Epigenetics. 2019 Aug 23;11:122. doi: 10.1186/s13148-019-0714-1 (PMC6706929; doi:10.1186/s13148-019-0714-1)
Supplement: Supplementary file 5 — Table S9. Gene ontology (GO) analysis results for ADEH+ vs healthy controls. (XLSX 11 kb) [file 13148_2019_714_MOESM5_ESM.xlsx]

## Sheet: SuppTable S9 GO analysis
Supplementary Table S9: Gene ontology (GO) analysis for 490 CpGs significantly different between ADEH+
and healthy control individuals from analysis with adjustment for six cell types.
EH Vs NA
GO_term	Term	Ont	N	DE	P.DE	FDR
GO:0002761	regulation of myeloid leukocyte differentiation	BP	107	12	3.80936e-06	0.0788118
GO:0002573	myeloid leukocyte differentiation	BP	182	15	8.85178e-06	0.0915672
GO:0072677	eosinophil migration	BP	15	4	6.87554e-05	0.209358
GO:0002763	positive regulation of myeloid leukocyte differentiation	BP	50	7	7.05808e-05	0.209358
GO:0009624	response to nematode	BP	6	3	6.72251e-05	0.209358
GO:0018894	dibenzo-p-dioxin metabolic process	BP	6	3	7.0835e-05	0.209358
GO:0047184	1-acylglycerophosphocholine O-acyltransferase activity	MF	4	3	3.4663e-05	0.209358
GO:0001816	cytokine production	BP	610	26	8.90599e-05	0.23032
GO:0002376	immune system process	BP	2497	73	0.000117678	0.270516
GO:0010633	negative regulation of epithelial cell migration	BP	52	7	0.000157812	0.287856
GO:0045651	positive regulation of macrophage differentiation	BP	13	4	0.000160599	0.287856
GO:2000422	regulation of eosinophil chemotaxis	BP	2	2	0.000180875	0.287856
GO:2000424	positive regulation of eosinophil chemotaxis	BP	2	2	0.000180875	0.287856
GO:0031643	positive regulation of myelination	BP	11	4	0.000203378	0.300549
GO:0030099	myeloid cell differentiation	BP	327	18	0.000241124	0.332575
GO:0030316	osteoclast differentiation	BP	84	8	0.000336258	0.399044
GO:1902105	regulation of leukocyte differentiation	BP	227	14	0.000345329	0.399044
GO:0048245	eosinophil chemotaxis	BP	11	3	0.000347179	0.399044
GO:0002215	defense response to nematode	BP	3	2	0.000375996	0.40942
GO:0005737	cytoplasm	CC	9895	225	0.000395942	0.409582
GO:0002682	regulation of immune system process	BP	1450	47	0.000435418	0.42897
GO:0045637	regulation of myeloid cell differentiation	BP	177	12	0.000466877	0.439055
GO:0008374	O-acyltransferase activity	MF	35	5	0.000521153	0.468788
